# Supplementary material for: Mechanistic investigation of the cleavage of phosphodiester catalyzed by a symmetrical oxyimine-based macrocyclic dinuclear zinc complex: a DFT study
Source: Royal Society of Chemistry journal article supplement (doi:10.1039/c4dt01491j), 2014-08-06
Supplement: c4dt01491j1.pdf [file c4dt01491j1.pdf]

## *Supplementary Material*

### **Mechanistic Investigation of the Cleavage of Phosphodiester Catalyzed by a Symmetrical Oxyimine-Based Macrocyclic Dinuclear Zinc Complex: A DFT Study**

*Xuepeng Zhang<sup>[a]</sup>, Xiaowei Zheng<sup>[a]</sup>, David Lee Phillips<sup>[b]</sup> and Cunyuan Zhao<sup>\*[a]</sup>*

[a] MOE Key Laboratory of Bioinorganic and Synthetic Chemistry/KLGHEI of Environment and Energy Chemistry, School of Chemistry and Chemical Engineering, Sun Yat-Sen University, Guangzhou 510275, P. R. China.

[b] Department of Chemistry, The University of Hong Kong, Pokfulam Road, Hong Kong, P. R. China.

1. Cartesian coordinates of optimized structures-----Page S2-S33
2. The labels of the atoms in the active site of reaction complexes in mechanism 1-----Page S34

## 1. Cartesian coordinates of optimized structures.

### 1-RC1

C, 0, 0. 3722367238, -1. 8967193586, 3. 1289900576  
H, 0, -0. 2356533538, -2. 4000513354, 3. 8825520638  
C, 0, 1. 1184876747, -0. 734972588, 3. 5766996416  
C, 0, 1. 0290302821, -0. 4552593788, 4. 9511197868  
H, 0, 0. 4095694141, -1. 1015568436, 5. 5682401671  
C, 0, 1. 7083654601, 0. 6055566772, 5. 5405012843  
C, 0, 2. 5011897772, 1. 4103737408, 4. 7345925019  
H, 0, 3. 0573422031, 2. 2340965161, 5. 1759593205  
C, 0, 2. 6054500896, 1. 2002265829, 3. 3470746805  
C, 0, 1. 9022073116, 0. 1143477859, 2. 7261912471  
C, 0, 3. 4935446292, 2. 1031506234, 2. 6415789471  
H, 0, 4. 1405669216, 2. 7295378071, 3. 2591229713  
C, 0, 4. 3216994434, 4. 2414012019, 0. 2773272433  
H, 0, 5. 2756956825, 4. 7623611348, 0. 156167078  
H, 0, 3. 6369465092, 4. 8841997763, 0. 8502333681  
C, 0, 3. 7004285989, 3. 9522988589, -1. 0876778669  
H, 0, 2. 6711644492, 3. 5738856102, -1. 0386572867  
H, 0, 3. 6871194662, 4. 8897702419, -1. 6541092786  
C, 0, 4. 809905746, 0. 9504202549, -2. 4478824227  
H, 0, 5. 5003254453, 1. 4262876809, -3. 1472561199  
C, 0, 4. 7237172838, -0. 4998270591, -2. 51137698  
C, 0, 5. 6211697554, -1. 1162339067, -3. 3965294638  
H, 0, 6. 2884532078, -0. 4809652568, -3. 9741669356  
C, 0, 5. 695625959, -2. 499084675, -3. 547599127  
C, 0, 4. 8553033439, -3. 2884840772, -2. 7805165313  
H, 0, 4. 9143257025, -4. 3718071347, -2. 854468825  
C, 0, 3. 910875494, -2. 727891724, -1. 8959405298  
C, 0, 3. 8015685345, -1. 3015949952, -1. 7537465138  
C, 0, 3. 1560865597, -3. 6798569431, -1. 1147811184  
H, 0, 3. 4945706012, -4. 7170136537, -1. 1541430989  
C, 0, 0. 4830891951, -5. 0524926531, 0. 2306503861  
H, 0, 0. 4298941623, -5. 9159117813, 0. 8994316936  
H, 0, 0. 335852086, -5. 3955465908, -0. 8046605126  
C, 0, -0. 6129089175, -4. 0506273647, 0. 5798506859  
H, 0, -0. 6924513443, -3. 2363645172, -0. 1449088762  
H, 0, -1. 5714587248, -4. 5795127628, 0. 5757540924  
N, 0, 0. 3564070625, -2. 4091920759, 1. 9469372937  
N, 0, 2. 143247769, -3. 4457516094, -0. 3442209542  
N, 0, 4. 1718211539, 1. 7280182918, -1. 6448250836  
N, 0, 3. 6140919905, 2. 2439496264, 1. 3638446121  
O, 0, 2. 9230978905, -0. 7677445248, -0. 9505135759  
O, 0, 2. 0156626569, -0. 1055539393, 1. 4433821432  
O, 0, 4. 5105901798, 3. 0635324769, -1. 8724666825  
O, 0, 4. 6996376647, 3. 1007421566, 1. 0588390173  
O, 0, -0. 4878994189, -3. 5294434664, 1. 9037935245  
O, 0, 1. 8275699272, -4. 599977427, 0. 4164462053  
Zn, 0, 1. 3022566548, -1. 5644013048, 0. 1897972991  
Zn, 0, 2. 5772588274, 1. 1905930939, -0. 2022851772  
H, 0, 1. 626261987, 0. 7929733881, 6. 605550048  
H, 0, 6. 4063532787, -2. 9441588016, -4. 2353456391

O, 0, 1. 0751691542, 2. 2057733612, -0. 777415696  
H, 0, 0. 5684471694, 1. 76839078, -1. 4776647641  
O, 0, -4. 2068965878, 6. 3601334154, 0. 2210682541  
N, 0, -4. 7702641412, 5. 46636534, -0. 413319394  
C, 0, -4. 0112677257, 4. 2435174916, -0. 6941398823  
O, 0, -5. 9287837243, 5. 5326239654, -0. 8281044921  
C, 0, -2. 6920615784, 4. 144620318, -0. 2478085434  
C, 0, -4. 6270721331, 3. 2155543309, -1. 408598573  
C, 0, -1. 9664224833, 2. 9883732186, -0. 5143305123  
H, 0, -2. 2512726892, 4. 9717033711, 0. 2947961527  
C, 0, -3. 902283014, 2. 0583589142, -1. 6745029744  
H, 0, -5. 6508061177, 3. 3329435855, -1. 7411515858  
C, 0, -2. 583507732, 1. 9527887185, -1. 2227565886  
H, 0, -0. 9235482266, 2. 8808629615, -0. 2220737982  
H, 0, -4. 3449308442, 1. 23800785, -2. 2293835095  
O, 0, -1. 8581662791, 0. 8197065094, -1. 560600923  
P, 0, -1. 5298866464, -0. 3764955373, -0. 481359816  
O, 0, -0. 2032584942, -0. 9760973295, -0. 9582154262  
O, 0, -1. 7441885537, 0. 0236821517, 0. 9331135449  
O, 0, -2. 5923024539, -1. 5573452565, -0. 9884753996  
C, 0, -3. 932465795, -1. 6340036228, -0. 7128924675  
C, 0, -4. 52273168, -1. 1119252163, 0. 4489195115  
C, 0, -4. 70685939, -2. 3281413948, -1. 6557301616  
C, 0, -5. 8864201291, -1. 2905639881, 0. 6571604452  
H, 0, -3. 9095070109, -0. 5798994617, 1. 1661949993  
C, 0, -6. 0667752046, -2. 5088238668, -1. 4438892994  
H, 0, -4. 2212588327, -2. 7161139372, -2. 5449850718  
C, 0, -6. 644255043, -1. 986800115, -0. 2849103537  
H, 0, -6. 3709824072, -0. 9007233552, 1. 5439882836  
H, 0, -6. 6853156142, -3. 0406114485, -2. 1562153034  
N, 0, -8. 0764212626, -2. 1799600057, -0. 0528223668  
O, 0, -8. 7178494936, -2. 7979536285, -0. 9053821434  
O, 0, -8. 5593880324, -1. 7168828968, 0. 9818020946

### 1-Pre

C, 0, 1. 3759480916, -3. 1112729795, 1. 6907079014  
H, 0, 2. 2287438123, -3. 5772022466, 2. 1877702386  
C, 0, 1. 2752454921, -3. 3113752021, 0. 2576602123  
C, 0, 2. 267449884, -4. 137753296, -0. 3013919676  
H, 0, 2. 9974235133, -4. 5882602066, 0. 3669564978  
C, 0, 2. 3429512428, -4. 3901466229, -1. 665314487  
C, 0, 1. 4093761931, -3. 7870069281, -2. 4982367646  
H, 0, 1. 4455258227, -3. 9701493455, -3. 5695890386  
C, 0, 0. 4128719793, -2. 9295867681, -2. 0005129934  
C, 0, 0. 3030703068, -2. 681889438, -0. 5935714276  
C, 0, -0. 505946077, -2. 3991356451, -2. 9854022631  
H, 0, -0. 4965948803, -2. 885257599, -3. 9627249047  
C, 0, -2. 3741810214, -0. 1067159616, -4. 5614515629  
H, 0, -2. 9349626373, -0. 3408659036, -5. 4709841756  
H, 0, -1. 4082653605, 0. 3339095872, -4. 8472833876  
C, 0, -3. 1573294073, 0. 8760528259, -3. 6929215325  
H, 0, -2. 5632091936, 1. 3435149342, -2. 897950638  
H, 0, -3. 551277717, 1. 6683733619, -4. 339234948  
C, 0, -5. 1117957641, -0. 5996281345, -1. 2505905014  
H, 0, -6. 0415220608, -0. 4115629324, -1. 7925358133

C, 0, -5. 2576021527, -1. 1588575998, 0. 0853740602  
C, 0, -6. 5702405803, -1. 4946954281, 0. 4453383783  
H, 0, -7. 3578400235, -1. 3312994247, -0. 2865160227  
C, 0, -6. 8998339422, -2. 0299776758, 1. 6899264227  
C, 0, -5. 8812319381, -2. 2353608833, 2. 6018524389  
H, 0, -6. 1042794305, -2. 6665165632, 3. 574942987  
C, 0, -4. 5408008194, -1. 8995123362, 2. 3091085755  
C, 0, -4. 187333524, -1. 3325044444, 1. 0324408645  
C, 0, -3. 5972240206, -2. 2293770097, 3. 3461104316  
H, 0, -3. 9915840911, -2. 7845232425, 4. 1990674945  
C, 0, -0. 8468509048, -1. 8817139684, 5. 2473071318  
H, 0, -0. 5435178113, -2. 5758060094, 6. 035866161  
H, 0, -1. 38382924, -1. 0383366582, 5. 7058411629  
C, 0, 0. 3870310583, -1. 3591723404, 4. 5103489729  
H, 0, 0. 1790138565, -0. 5029600018, 3. 8622776161  
H, 0, 1. 1167310616, -1. 0299138226, 5. 2580219079  
N, 0, 0. 5892244833, -2. 4131087425, 2. 4352562067  
N, 0, -2. 3239911092, -1. 9865854905, 3. 3825636486  
N, 0, -4. 018815768, -0. 2907472395, -1. 8544140126  
N, 0, -1. 355055345, -1. 4348788002, -2. 8488680156  
O, 0, -2. 9598260578, -1. 0021421139, 0. 7499970219  
O, 0, -0. 6707697961, -1. 9505649059, -0. 1235316944  
O, 0, -4. 3134320879, 0. 259970172, -3. 1102969562  
O, 0, -2. 188518978, -1. 4042733136, -3. 9919187746  
O, 0, 1. 0442358892, -2. 3867140294, 3. 763185569  
O, 0, -1. 7365749053, -2. 6816057426, 4. 4677437919  
Zn, 0, -1. 1544871717, -1. 3035022225, 1. 7704547566  
Zn, 0, -1. 8030504332, -0. 2854861208, -1. 0415269795  
H, 0, 3. 1133986609, -5. 0381647292, -2. 068596255  
H, 0, -7. 9264682592, -2. 2840738592, 1. 9303360414  
O, 0, -1. 9493322014, 1. 6295821165, -0. 9474943343  
H, 0, -2. 8134512344, 1. 8873850056, -0. 5915734195  
O, 0, 1. 2263122803, 6. 671938721, -3. 7507090614  
N, 0, 1. 9673896389, 6. 570357244, -2. 7710145521  
C, 0, 1. 674157875, 5. 5154692138, -1. 7970489051  
O, 0, 2. 9390161197, 7. 2979879398, -2. 5568915005  
C, 0, 0. 567968822, 4. 6880765682, -2. 0000431066  
C, 0, 2. 5070594076, 5. 3702007441, -0. 6867609853  
C, 0, 0. 2783777638, 3. 6851445013, -1. 0796046882  
H, 0, -0. 0574023772, 4. 8450709975, -2. 870463873  
C, 0, 2. 2247655559, 4. 3664360257, 0. 2327321452  
H, 0, 3. 3539209859, 6. 0331305866, -0. 5612617279  
C, 0, 1. 1200652227, 3. 5332942249, 0. 0261016715  
H, 0, -0. 5875295357, 3. 0272259082, -1. 1840764159  
H, 0, 2. 8461992101, 4. 2190150542, 1. 1096150173  
O, 0, 0. 8480651265, 2. 5989575981, 1. 0109529164  
P, 0, 0. 6962733202, 0. 9893241559, 0. 8015503338  
O, 0, -0. 348388631, 0. 5318042519, 1. 8207508886  
O, 0, 0. 6152350191, 0. 5332239053, -0. 6213927366  
O, 0, 2. 1076231331, 0. 4706309695, 1. 5210915916  
C, 0, 3. 3756706512, 0. 5634605867, 1. 0145273963  
C, 0, 3. 6706439036, 0. 6987586744, -0. 3512418998  
C, 0, 4. 4109499658, 0. 476267451, 1. 9589625726  
C, 0, 4. 9995725714, 0. 7492564903, -0. 7593258142  
H, 0, 2. 8658917107, 0. 7473030203, -1. 074475006

C, 0, 5. 7359390116, 0. 5206202272, 1. 5498335757  
H, 0, 4. 1518023018, 0. 3749301851, 3. 0075282331  
C, 0, 6. 0180322378, 0. 6578160599, 0. 1891720718  
H, 0, 5. 2575322395, 0. 8522810835, -1. 8062422951  
H, 0, 6. 5506486638, 0. 455030072, 2. 2602713216  
N, 0, 7. 4132727359, 0. 6973699701, -0. 2497392215  
O, 0, 8. 2893833676, 0. 6093219654, 0. 613389077  
O, 0, 7. 6340243, 0. 812662529, -1. 4565356446

1-RC2

C, 0, -0. 6473554935, -0. 0894800467, -0. 0159285941  
H, 0, -0. 2086615278, -0. 588327879, 0. 8503432478  
C, 0, -1. 1264615909, -0. 948451657, -1. 0812649961  
C, 0, -1. 0288758182, -2. 3294536575, -0. 8295253492  
H, 0, -0. 6573024377, -2. 6504037923, 0. 1408486963  
C, 0, -1. 3860556129, -3. 2826176365, -1. 7744197078  
C, 0, -1. 8371684229, -2. 8448096823, -3. 0136462701  
H, 0, -2. 1225524136, -3. 5727521919, -3. 7694323841  
C, 0, -1. 9315350075, -1. 4791356693, -3. 3324471195  
C, 0, -1. 5987697246, -0. 4833944632, -2. 3577112977  
C, 0, -2. 4502145453, -1. 179283355, -4. 650987258  
H, 0, -2. 9176311656, -2. 014180736, -5. 1763772746  
C, 0, -2. 7456574413, 0. 3924552364, -7. 6250990974  
H, 0, -3. 4242764948, -0. 0008753352, -8. 3875882053  
H, 0, -1. 7303152873, 0. 0300921437, -7. 8397091449  
C, 0, -2. 7709707327, 1. 9229256407, -7. 6278799551  
H, 0, -1. 908162408, 2. 3871057528, -7. 1340803413  
H, 0, -2. 7973176767, 2. 2672991538, -8. 6677389132  
C, 0, -4. 7297655734, 3. 4331401359, -5. 2286720702  
H, 0, -5. 4751083586, 3. 7568684022, -5. 9590598188  
C, 0, -4. 8955945487, 3. 9594913485, -3. 8805672875  
C, 0, -6. 0626859063, 4. 7111416416, -3. 6858621664  
H, 0, -6. 7447294027, 4. 8198237343, -4. 5258924645  
C, 0, -6. 3829736096, 5. 3153887004, -2. 470369694  
C, 0, -5. 5057099131, 5. 1580663319, -1. 4145532977  
H, 0, -5. 7349928804, 5. 6014699235, -0. 4484551983  
C, 0, -4. 3034079454, 4. 427773721, -1. 5484731316  
C, 0, -3. 9485808515, 3. 8136541434, -2. 8039371712  
C, 0, -3. 5415464492, 4. 3021876789, -0. 3342283052  
H, 0, -4. 0060071858, 4. 7012456098, 0. 5691619076  
C, 0, -0. 7990954962, 3. 9706205222, 1. 6016276949  
H, 0, -0. 8278287729, 3. 8697029744, 2. 6900213374  
H, 0, -0. 589039011, 5. 0203840456, 1. 3495973432  
C, 0, 0. 2992281941, 3. 0756971927, 1. 0245250648  
H, 0, 0. 5422834326, 3. 3028358008, -0. 0173411104  
H, 0, 1. 211151731, 3. 2292273717, 1. 6117204064  
N, 0, -0. 6434836868, 1. 1994150704, 0. 0008403631  
N, 0, -2. 3893065405, 3. 7321775958, -0. 157024239  
N, 0, -3. 7989757232, 2. 6573088295, -5. 6590138309  
N, 0, -2. 4598608016, -0. 0532929054, -5. 2857986605  
O, 0, -2. 8343914464, 3. 1569454544, -2. 9494497135  
O, 0, -1. 7575457655, 0. 7815965566, -2. 6272270094  
O, 0, -3. 9732416138, 2. 4314378633, -7. 0344063705  
O, 0, -3. 2613128268, -0. 2144355694, -6. 4403731763  
O, 0, -0. 0127353981, 1. 6860901443, 1. 1581298769

0, 0, -2. 1305188755, 3. 6172406099, 1. 2312939737  
Zn, 0, -1. 4182863273, 2. 5006926856, -1. 5614213238  
Zn, 0, -1. 7833544886, 1. 9285267066, -4. 5873784794  
H, 0, -1. 3093946916, -4. 3413616795, -1. 5521939474  
H, 0, -7. 2990745897, 5. 8850644586, -2. 3582269706  
O, 0, -1. 0132147417, 3. 3951856377, -5. 5821910456  
H, 0, -1. 6412692657, 4. 1336625639, -5. 5891816745  
O, 0, 2. 7205930784, 8. 0492597104, -7. 1380686301  
N, 0, 3. 6053244466, 7. 5524382866, -6. 438606518  
C, 0, 3. 3032795806, 6. 3037025295, -5. 7361825992  
O, 0, 4. 7286303419, 8. 0391821584, -6. 2899818705  
C, 0, 2. 0449088278, 5. 7207428526, -5. 8860009713  
C, 0, 4. 2867124497, 5. 724168632, -4. 9321268361  
C, 0, 1. 7425990231, 4. 5330020251, -5. 2235409287  
H, 0, 1. 3113118772, 6. 1962934686, -6. 5256163052  
C, 0, 3. 9913567296, 4. 5435732843, -4. 2642008741  
H, 0, 5. 2544646157, 6. 2009936206, -4. 8400583808  
C, 0, 2. 7254605975, 3. 9625092554, -4. 4112902268  
H, 0, 0. 7555017225, 4. 0699188314, -5. 3530812423  
H, 0, 4. 7249342316, 4. 0599107393, -3. 6279351767  
O, 0, 2. 5475490899, 2. 7749767211, -3. 7249951016  
P, 0, 1. 1600186743, 2. 0727780477, -3. 2413872857  
O, 0, 0. 3769222309, 3. 0297514021, -2. 342391381  
O, 0, 0. 423066831, 1. 3516662325, -4. 3350821139  
O, 0, 1. 8511548405, 1. 0092370777, -2. 1873176155  
C, 0, 2. 6528735006, -0. 060167182, -2. 4974214444  
C, 0, 2. 7801214246, -0. 6015169469, -3. 7844829159  
C, 0, 3. 3479652469, -0. 6195126752, -1. 4155066037  
C, 0, 3. 6080988328, -1. 7021378223, -3. 9790906438  
H, 0, 2. 225367017, -0. 1751308193, -4. 6110389616  
C, 0, 4. 1701024673, -1. 7202445758, -1. 6102255425  
H, 0, 3. 2319719583, -0. 1726214135, -0. 4337667596  
C, 0, 4. 2920482294, -2. 2520466407, -2. 8952517424  
H, 0, 3. 7269227702, -2. 1436409768, -4. 9609092317  
H, 0, 4. 71842429, -2. 1698569899, -0. 7917516883  
N, 0, 5. 1529696017, -3. 4166658979, -3. 1069332612  
O, 0, 5. 7371036411, -3. 8839033297, -2. 1271034457  
O, 0, 5. 2424929326, -3. 8652733018, -4. 250966548

1-TS1

C, 0, -0. 7274013462, -1. 8799608158, 3. 2916999931  
H, 0, -0. 3028070002, -2. 2554248269, 4. 2245343892  
C, 0, -1. 1619546624, -2. 8770839673, 2. 332446877  
C, 0, -1. 0126916823, -4. 2160928306, 2. 736211041  
H, 0, -0. 6354269154, -4. 4142889131, 3. 7367689246  
C, 0, -1. 324773459, -5. 2808881717, 1. 8993997311  
C, 0, -1. 7694032886, -5. 0027474815, 0. 6125266952  
H, 0, -2. 0025021046, -5. 8218549852, -0. 0637662531  
C, 0, -1. 9133230561, -3. 6854678727, 0. 1431295882  
C, 0, -1. 6505625343, -2. 5771166674, 1. 0154662936  
C, 0, -2. 3627501186, -3. 551449615, -1. 227929823  
H, 0, -2. 7557994002, -4. 4540000056, -1. 6999824525  
C, 0, -2. 315175361, -2. 2744512889, -4. 3348778905  
H, 0, -2. 9428317455, -2. 6418189242, -5. 1513706387  
H, 0, -1. 3266305827, -2. 7499948364, -4. 4074424642

C, 0, -2. 1648845149, -0. 7535013092, -4. 4408435565  
H, 0, -1. 3520277049, -0. 3325924048, -3. 8387984357  
H, 0, -1. 9494825719, -0. 5069045173, -5. 4862033006  
C, 0, -4. 4583832519, 1. 0080879147, -2. 5349653858  
H, 0, -5. 1006538437, 1. 2516921235, -3. 3842392033  
C, 0, -4. 8257713278, 1. 6056162648, -1. 2596137272  
C, 0, -6. 0428414221, 2. 3000898251, -1. 2355832796  
H, 0, -6. 6396145331, 2. 322995995, -2. 1446467108  
C, 0, -6. 511980791, 2. 9539942743, -0. 0957063929  
C, 0, -5. 7354808932, 2. 9219223376, 1. 0502363446  
H, 0, -6. 0825314522, 3. 4191577814, 1. 9530857264  
C, 0, -4. 4901562337, 2. 2589330272, 1. 0846821766  
C, 0, -3. 9977033776, 1. 5763345288, -0. 0827918374  
C, 0, -3. 8063872544, 2. 2786271905, 2. 3537009396  
H, 0, -4. 3511995277, 2. 7198192206, 3. 1904863094  
C, 0, -1. 1398637784, 2. 3028095055, 4. 4278011886  
H, 0, -1. 2089081954, 2. 3008428578, 5. 5189483353  
H, 0, -0. 9791949433, 3. 336100753, 4. 0865787349  
C, 0, 0. 0387221029, 1. 4326123731, 3. 9831245284  
H, 0, 0. 3101169876, 1. 565813313, 2. 9310144939  
H, 0, 0. 9135456432, 1. 7167247381, 4. 5778016866  
N, 0, -0. 7496210887, -0. 5979902281, 3. 1478638175  
N, 0, -2. 6316318018, 1. 8069332655, 2. 6404000488  
N, 0, -3. 4494931046, 0. 2443430412, -2. 7718427887  
N, 0, -2. 3518347439, -2. 4906171933, -1. 9653517321  
O, 0, -2. 8544628959, 0. 9652428631, -0. 0761869798  
O, 0, -1. 8925666438, -1. 3567156606, 0. 6310612385  
O, 0, -3. 3860333631, -0. 0738218451, -4. 1360074664  
O, 0, -3. 0184731102, -2. 748672111, -3. 1842699627  
O, 0, -0. 1726129142, 0. 046004865, 4. 2549027024  
O, 0, -2. 4344882547, 1. 8405274488, 4. 0427614538  
Zn, 0, -1. 4780495469, 0. 4978288975, 1. 4332762054  
Zn, 0, -1. 77492256, -0. 5027992002, -1. 3905512252  
H, 0, -1. 2093942633, -6. 3046438232, 2. 238165232  
H, 0, -7. 4632164397, 3. 474872942, -0. 109783811  
O, 0, -0. 5374288157, 0. 8846884673, -2. 0076515941  
H, 0, -0. 8652550833, 1. 7795511636, -1. 8260017636  
O, 0, 5. 4502898448, 5. 9198877979, 0. 1576434458  
N, 0, 5. 5780516199, 5. 1848579188, -0. 8248397036  
C, 0, 4. 6329415105, 4. 0812712453, -0. 9792593063  
O, 0, 6. 4500034551, 5. 3211564218, -1. 6856518425  
C, 0, 3. 6278672181, 3. 9057750679, -0. 0280144899  
C, 0, 4. 7520059033, 3. 2257890207, -2. 0772153823  
C, 0, 2. 7223792247, 2. 8608994637, -0. 1686209267  
H, 0, 3. 5652400524, 4. 5921808114, 0. 8074808468  
C, 0, 3. 8503999443, 2. 1812114682, -2. 2173560179  
H, 0, 5. 5440151271, 3. 3890059463, -2. 7975238546  
C, 0, 2. 8354688657, 1. 9930470299, -1. 2655320846  
H, 0, 1. 9288913365, 2. 713858953, 0. 5527354476  
H, 0, 3. 9113708446, 1. 495599114, -3. 0554666544  
O, 0, 1. 9782795185, 0. 9623651033, -1. 5165542739  
P, 0, 0. 9713799994, 0. 196996709, -0. 4543700727  
O, 0, 0. 2100969746, 1. 1123313511, 0. 5361039216  
O, 0, 0. 4334837484, -1. 1336301945, -0. 9294629172  
O, 0, 2. 2140570352, -0. 2290049868, 0. 6430821765

C, 0, 3. 2263837021, -1. 102597569, 0. 4205597859  
C, 0, 3. 3867697253, -1. 8667709058, -0. 7504299452  
C, 0, 4. 165914418, -1. 2227058094, 1. 46267253  
C, 0, 4. 4674824881, -2. 7324253353, -0. 8651579871  
H, 0, 2. 6573941711, -1. 7969470636, -1. 5461809555  
C, 0, 5. 24234749, -2. 0878595877, 1. 3487654664  
H, 0, 4. 0273683647, -0. 6189282057, 2. 353573806  
C, 0, 5. 3861596241, -2. 8403535906, 0. 1799213754  
H, 0, 4. 6084851635, -3. 332480344, -1. 7559177454  
H, 0, 5. 9727717469, -2. 1897362026, 2. 1419088205  
N, 0, 6. 512820944, -3. 7575096163, 0. 0529237559  
O, 0, 7. 302241268, -3. 8372005215, 0. 9983302473  
O, 0, 6. 6161314414, -4. 4068199726, -0. 991518486

#### 1-IMI

C, 0, -0. 5645742589, 0. 2063872281, 0. 1901690545  
H, 0, -0. 1417575294, -0. 0915563665, 1. 1514034909  
C, 0, -0. 8931205491, -0. 8627656038, -0. 7329889868  
C, 0, -0. 6578396543, -2. 1686964824, -0. 2686920438  
H, 0, -0. 2744289614, -2. 2964433209, 0. 7410070884  
C, 0, -0. 8976876718, -3. 2899639054, -1. 055450219  
C, 0, -1. 3714086655, -3. 1039475127, -2. 3483087259  
H, 0, -1. 5632955908, -3. 9683529084, -2. 9797750605  
C, 0, -1. 6001574721, -1. 8220756224, -2. 878886275  
C, 0, -1. 3841935878, -0. 656701322, -2. 0682708229  
C, 0, -2. 0976255617, -1. 776478081, -4. 2383663197  
H, 0, -2. 4524149177, -2. 7207472551, -4. 6564873664  
C, 0, -2. 1352130175, -0. 7996976034, -7. 3909203156  
H, 0, -2. 8041248886, -1. 1520639513, -8. 1808742007  
H, 0, -1. 2067770257, -1. 3886274132, -7. 4225564421  
C, 0, -1. 8023090999, 0. 675578998, -7. 618923625  
H, 0, -0. 9801246246, 1. 0372276054, -6. 9909968441  
H, 0, -1. 4831991813, 0. 7996624541, -8. 6588112096  
C, 0, -4. 1296770259, 2. 702752522, -6. 0215565447  
H, 0, -4. 7108550528, 2. 8873698349, -6. 9272153943  
C, 0, -4. 5842477022, 3. 3827410096, -4. 8183641709  
C, 0, -5. 7638127587, 4. 1320693083, -4. 9441564627  
H, 0, -6. 270113037, 4. 1381685787, -5. 9067231119  
C, 0, -6. 3036697442, 4. 8606441839, -3. 8852177105  
C, 0, -5. 6400118242, 4. 8528089621, -2. 6677658792  
H, 0, -6. 0453990562, 5. 4132546012, -1. 8284829805  
C, 0, -4. 4392976503, 4. 138614831, -2. 4820512936  
C, 0, -3. 8832216429, 3. 3683023832, -3. 5618730602  
C, 0, -3. 8612818581, 4. 201256441, -1. 1594000839  
H, 0, -4. 4658717907, 4. 6835857657, -0. 3888863842  
C, 0, -1. 3802217008, 4. 3917202697, 1. 0964234488  
H, 0, -1. 5183650947, 4. 4121588141, 2. 1807428995  
H, 0, -1. 2682716301, 5. 4247506189, 0. 7353048335  
C, 0, -0. 1158772757, 3. 6004370179, 0. 7526103803  
H, 0, 0. 1993988916, 3. 7077101308, -0. 2906948652  
H, 0, 0. 6995616865, 3. 9861587703, 1. 373964089  
N, 0, -0. 6947592856, 1. 4745638479, -0. 0106765831  
N, 0, -2. 7166883185, 3. 7374930386, -0. 7636327529  
N, 0, -3. 108467513, 1. 9259982845, -6. 1435775068  
N, 0, -2. 1777920386, -0. 7477993988, -5. 0170709248

O, 0, -2. 7971918531, 2. 681823293, -3. 3996903558  
O, 0, -1. 672323103, 0. 5250952815, -2. 5221072748  
O, 0, -2. 9445364654, 1. 5205851831, -7. 4746117493  
O, 0, -2. 874959428, -1. 0913789826, -6. 2049136031  
O, 0, -0. 2248977498, 2. 2153199443, 1. 0862417675  
O, 0, -2. 6175996013, 3. 8351705623, 0. 6458613354  
Zn, 0, -1. 3990806991, 2. 4308743898, -1. 8082158143  
Zn, 0, -1. 6397267097, 1. 3186787311, -4. 6169014882  
H, 0, -0. 7133390643, -4. 2866013472, -0. 6696911448  
H, 0, -7. 222265745, 5. 4226587134, -4. 0137289481  
O, 0, -0. 488944971, 3. 0948916707, -5. 0303767507  
H, 0, -0. 7703325216, 3. 9789401562, -4. 7452596999  
O, 0, 6. 3415524662, 7. 0690188156, -2. 4295740447  
N, 0, 6. 2836675165, 6. 5716823269, -3. 5572754927  
C, 0, 5. 1332677051, 5. 7288271493, -3. 8738712993  
O, 0, 7. 1325074953, 6. 7430413628, -4. 4351020736  
C, 0, 4. 1479596901, 5. 5271918487, -2. 9051751619  
C, 0, 5. 0395854737, 5. 1460639966, -5. 1390832124  
C, 0, 3. 046625151, 4. 7356559333, -3. 2023528244  
H, 0, 4. 2573506577, 5. 9969226276, -1. 9354447974  
C, 0, 3. 9405381695, 4. 3509390902, -5. 4339177035  
H, 0, 5. 8230275628, 5. 3195406724, -5. 8663047831  
C, 0, 2. 9414493333, 4. 1428763519, -4. 4707771373  
H, 0, 2. 2703250341, 4. 5625050897, -2. 4677423347  
H, 0, 3. 8336147299, 3. 8816283992, -6. 4058630434  
O, 0, 1. 8554445665, 3. 4236500504, -4. 8745541112  
P, 0, 0. 8421593321, 2. 4658701719, -3. 9376709223  
O, 0, 0. 2323721958, 3. 1688743075, -2. 6715739565  
O, 0, 0. 4122345549, 1. 0531512138, -4. 4193509763  
O, 0, 2. 2223149449, 1. 8853417562, -2. 9890924017  
C, 0, 3. 1564457808, 1. 0080042143, -3. 3814250596  
C, 0, 3. 3490830261, 0. 5632598144, -4. 7079292343  
C, 0, 4. 019855681, 0. 5261558928, -2. 3718562926  
C, 0, 4. 3610123292, -0. 3395259617, -5. 0019869544  
H, 0, 2. 6948293236, 0. 9135857977, -5. 4946394256  
C, 0, 5. 0298216619, -0. 3741689092, -2. 664341757  
H, 0, 3. 868399361, 0. 883501299, -1. 3583173615  
C, 0, 5. 194918185, -0. 8083695075, -3. 9839502331  
H, 0, 4. 51788986, -0. 6918617108, -6. 0143937651  
H, 0, 5. 6932731132, -0. 7498100065, -1. 8948952899  
N, 0, 6. 2442086421, -1. 763329235, -4. 2988934944  
O, 0, 6. 96238607, -2. 1630148014, -3. 3760507406  
O, 0, 6. 3640252182, -2. 1307559983, -5. 4728785077

#### 1-TS2

C, 0, -2. 4867206368, 0. 9486685241, -1. 3616747801  
H, 0, -3. 4756853836, 1. 3049214387, -1. 6558897055  
C, 0, -2. 1118251648, -0. 3746473398, -1. 8227263751  
C, 0, -3. 046397792, -1. 0299304899, -2. 6424507443  
H, 0, -3. 9715014964, -0. 5125896046, -2. 8860503435  
C, 0, -2. 8234586817, -2. 3066779466, -3. 1484106509  
C, 0, -1. 6389288869, -2. 9533680393, -2. 8199937466  
H, 0, -1. 4445498345, -3. 9500271519, -3. 209364521  
C, 0, -0. 6764915702, -2. 3611358325, -1. 9820990568  
C, 0, -0. 8881136529, -1. 037918761, -1. 4653551614

C, 0, 0. 5171520077, -3. 1413999707, -1. 731852833  
H, 0, 0. 6527702166, -4. 0317156825, -2. 3491990559  
C, 0, 2. 8362119612, -4. 5555515865, 0. 1305919273  
H, 0, 3. 6635910618, -5. 1895932002, -0. 1995221562  
H, 0, 1. 9877333416, -5. 1965561159, 0. 4121289896  
C, 0, 3. 2656939817, -3. 7377446045, 1. 3488813323  
H, 0, 2. 4332629858, -3. 2200077723, 1. 8385866107  
H, 0, 3. 6936509941, -4. 4243408269, 2. 086480986  
C, 0, 4. 7389430324, -0. 7093130415, 0. 4811052819  
H, 0, 5. 7578587027, -1. 0579628931, 0. 6592942504  
C, 0, 4. 5924606132, 0. 6913769487, 0. 1197653409  
C, 0, 5. 7883235507, 1. 41971098, 0. 0126043998  
H, 0, 6. 7265747045, 0. 8964660682, 0. 1818150735  
C, 0, 5. 8124418798, 2. 7765709978, -0. 3011880236  
C, 0, 4. 6061567752, 3. 4320198969, -0. 4994704473  
H, 0, 4. 601455015, 4. 4915509174, -0. 7445929858  
C, 0, 3. 371538318, 2. 764385985, -0. 3819882867  
C, 0, 3. 3347477847, 1. 3571345275, -0. 0881983968  
C, 0, 2. 1926372588, 3. 569489419, -0. 6176341843  
H, 0, 2. 3573903326, 4. 5639803436, -1. 0370320051  
C, 0, -0. 8514758966, 4. 7292392263, 0. 0468617778  
H, 0, -1. 4101621466, 5. 4688797028, -0. 5328064463  
H, 0, -0. 3265699908, 5. 2442537803, 0. 8652590192  
C, 0, -1. 8168932328, 3. 7036328389, 0. 6434620824  
H, 0, -1. 3521353071, 3. 040573422, 1. 380621132  
H, 0, -2. 6090801435, 4. 254406766, 1. 1619774807  
N, 0, -1. 7838854103, 1. 7470109249, -0. 6305615202  
N, 0, 0. 9583113555, 3. 248178031, -0. 3948512137  
N, 0, 3. 8010554916, -1. 5787324715, 0. 6372898944  
N, 0, 1. 4501098333, -2. 9040450631, -0. 8680994459  
O, 0, 2. 2055011553, 0. 7182905989, -0. 0547537314  
O, 0, 0. 0177558602, -0. 4604381689, -0. 7376182439  
O, 0, 4. 3151961188, -2. 8137392519, 1. 0469940888  
O, 0, 2. 5289443755, -3. 8087553501, -1. 0489721985  
O, 0, -2. 4862701435, 2. 9305194084, -0. 3550820108  
O, 0, 0. 0871676766, 4. 2366902792, -0. 9141668064  
Zn, 0, 0. 1689920687, 1. 3649754602, 0. 2079099065  
Zn, 0, 1. 6813138714, -1. 2402366407, 0. 4882639895  
H, 0, -3. 559730108, -2. 7860610775, -3. 784109249  
H, 0, 6. 754320862, 3. 3074876844, -0. 3856373898  
O, 0, 1. 9752083924, -0. 0677708942, 2. 7551088435  
H, 0, 2. 2241372248, 0. 7829279194, 3. 1507845535  
O, 0, -3. 5032847441, 2. 8279079231, 8. 333908677  
N, 0, -2. 8039389318, 1. 8401812015, 8. 5749758979  
C, 0, -1. 9944024543, 1. 2946590476, 7. 4884757429  
O, 0, -2. 7419861665, 1. 2869492999, 9. 6753541639  
C, 0, -2. 0317276016, 1. 9092408014, 6. 2346484547  
C, 0, -1. 196537135, 0. 1741168958, 7. 7259930536  
C, 0, -1. 2560565626, 1. 402809458, 5. 2009346414  
H, 0, -2. 6650542774, 2. 7759169072, 6. 0904773721  
C, 0, -0. 4248135953, -0. 334330079, 6. 6895830105  
H, 0, -1. 1941653954, -0. 2810662338, 8. 7086116053  
C, 0, -0. 4487915322, 0. 2761244461, 5. 4265656576  
H, 0, -1. 271012006, 1. 8557407724, 4. 2176425131  
H, 0, 0. 2069411825, -1. 2036237658, 6. 8365739031

O, 0, 0. 4143265857, -0. 2221887545, 4. 4956703003  
P, 0, 0. 2403240149, -0. 261788064, 2. 8138531427  
O, 0, -0. 093832342, 1. 1260960734, 2. 1502649546  
O, 0, 0. 4005892596, -1. 5700170676, 1. 9646832884  
O, 0, -1. 5254287452, -0. 5658593603, 3. 0381920129  
C, 0, -2. 1051245772, -1. 7087218374, 3. 4078147471  
C, 0, -1. 428885234, -2. 8328314061, 3. 9373273289  
C, 0, -3. 5132582598, -1. 7703494526, 3. 2773852371  
C, 0, -2. 135476895, -3. 9687172041, 4. 3036445888  
H, 0, -0. 3525066067, -2. 8118138411, 4. 0433204736  
C, 0, -4. 2188813751, -2. 9027352165, 3. 6433111031  
H, 0, -4. 0250797208, -0. 8992403742, 2. 880830157  
C, 0, -3. 524571944, -4. 0058035893, 4. 153755526  
H, 0, -1. 627782914, -4. 8363206803, 4. 7079739353  
H, 0, -5. 2961581696, -2. 9551315942, 3. 5421230752  
N, 0, -4. 2544219719, -5. 203535344, 4. 526282826  
O, 0, -5. 482190302, -5. 2065253935, 4. 3804758857  
O, 0, -3. 6128036881, -6. 1643654201, 4. 9675768395

#### 1-IM2

C, 0, -2. 5907113978, 1. 3913531829, -1. 339256691  
H, 0, -3. 5590575543, 1. 8585189655, -1. 52585849  
C, 0, -2. 4190529141, 0. 0380050591, -1. 8368066322  
C, 0, -3. 4961140013, -0. 4912198694, -2. 5654176106  
H, 0, -4. 3754362924, 0. 1297585324, -2. 7152324764  
C, 0, -3. 4760543681, -1. 7807786665, -3. 0918009502  
C, 0, -2. 3566612307, -2. 5683784825, -2. 8740058421  
H, 0, -2. 3188025165, -3. 5765455439, -3. 2800896537  
C, 0, -1. 2590646879, -2. 1069173444, -2. 118097412  
C, 0, -1. 265885032, -0. 7768134636, -1. 5794998892  
C, 0, -0. 1590979944, -3. 031511157, -1. 9681893384  
H, 0, -0. 1918178967, -3. 9307131029, -2. 5865408443  
C, 0, 2. 1951219903, -4. 6828001023, -0. 3059320793  
H, 0, 2. 8944113544, -5. 4170884883, -0. 7149398578  
H, 0, 1. 3288108881, -5. 2150226834, 0. 1146133035  
C, 0, 2. 8766379406, -3. 8836730421, 0. 8057488876  
H, 0, 2. 1867526497, -3. 2558583167, 1. 3798540077  
H, 0, 3. 3220472912, -4. 5964292282, 1. 507809662  
C, 0, 4. 5538181417, -1. 0485263326, -0. 2966346185  
H, 0, 5. 5428848667, -1. 4996530752, -0. 1980152779  
C, 0, 4. 5206897617, 0. 3549357155, -0. 6678745476  
C, 0, 5. 7722005263, 0. 9496048151, -0. 8976398726  
H, 0, 6. 660930851, 0. 3293500372, -0. 8069319996  
C, 0, 5. 9100265659, 2. 2932343293, -1. 2345878094  
C, 0, 4. 7652840633, 3. 0713249175, -1. 3278930595  
H, 0, 4. 848682763, 4. 1242350791, -1. 5871646945  
C, 0, 3. 4845008819, 2. 5401874149, -1. 0832142874  
C, 0, 3. 3261737998, 1. 1470430118, -0. 7675185626  
C, 0, 2. 3838255619, 3. 4714680585, -1. 2086676362  
H, 0, 2. 6104489825, 4. 4395586371, -1. 6599728956  
C, 0, -0. 4040477043, 4. 9662696753, -0. 20843128  
H, 0, -0. 9547564929, 5. 754791552, -0. 7282226552  
H, 0, 0. 2769844532, 5. 4303048573, 0. 5205531811  
C, 0, -1. 3825681817, 4. 0559568789, 0. 535931342  
H, 0, -0. 8972851039, 3. 3574705939, 1. 2256631355

H, 0, -2. 0384027215, 4. 6948331994, 1. 1370788621  
N, 0, -1. 7260323327, 2. 0978458742, -0. 6930821435  
N, 0, 1. 1559397908, 3. 2892236696, -0. 8455699396  
N, 0, 3. 5484728698, -1. 8159388961, -0. 050978024  
N, 0, 0. 8725811055, -2. 9175982378, -1. 1926451082  
O, 0, 2. 1414444714, 0. 6276509902, -0. 631575901  
O, 0, -0. 2497748218, -0. 3277846432, -0. 9013754462  
O, 0, 3. 9712734189, -3. 0981737506, 0. 3266541022  
O, 0, 1. 8109456791, -3. 944546927, -1. 4681180923  
O, 0, -2. 2554879221, 3. 3498636602, -0. 3488070857  
O, 0, 0. 3423205199, 4. 3658495639, -1. 272207432  
H, 0, -4. 3251082576, -2. 1609119109, -3. 6482943378  
H, 0, 6. 8900708456, 2. 7209131629, -1. 4156868538  
O, 0, 1. 2328202093, 0. 2577362517, 4. 246295245  
P, 0, 0. 7805181976, 0. 1072585079, 2. 6145476141  
O, 0, -0. 8651734136, -0. 2348662036, 3. 367025453  
C, 0, -2. 0008116669, -0. 39736399, 2. 6988286128  
C, 0, -2. 2242655671, -1. 4716275528, 1. 8040263107  
C, 0, -3. 0623619973, 0. 5078129938, 2. 94171151  
C, 0, -3. 4403329569, -1. 6077105995, 1. 1529740074  
H, 0, -1. 4209633115, -2. 1787429975, 1. 6423389352  
C, 0, -4. 2802651833, 0. 3739132532, 2. 2957049339  
H, 0, -2. 8890619045, 1. 3150734192, 3. 6458125598  
C, 0, -4. 4595594441, -0. 6771431535, 1. 3872939426  
H, 0, -3. 6207044161, -2. 4198806872, 0. 4589317424  
H, 0, -5. 0924667327, 1. 070440275, 2. 4665374565  
N, 0, -5. 7071162235, -0. 7858608437, 0. 6563163225  
O, 0, -6. 6090800986, 0. 0200702538, 0. 9126896845  
O, 0, -5. 804316621, -1. 6696118291, -0. 2066070537  
O, 0, 0. 1946344057, 1. 3663184594, 1. 8765127507  
O, 0, 0. 8172303226, -1. 2647130776, 1. 8503123005  
Zn, 0, 0. 2640843597, 1. 5158935174, -0. 0792535798  
Zn, 0, 1. 4728271258, -1. 2472025979, -0. 0099700731  
O, 0, 2. 4395659363, 0. 4639868789, 2. 2854023707  
H, 0, 2. 7489583188, 1. 0147732083, 3. 0210072917  
C, 0, 0. 7787118988, -0. 4146543936, 5. 3369316243  
C, 0, 0. 6657083992, 0. 3085007008, 6. 532964576  
C, 0, 0. 5460622334, -1. 7999970335, 5. 3235443263  
C, 0, 0. 3225125721, -0. 3417611586, 7. 7112233518  
H, 0, 0. 8518882941, 1. 3771496102, 6. 5172484062  
C, 0, 0. 1997739817, -2. 4512464225, 6. 497712824  
H, 0, 0. 6288619156, -2. 3419612559, 4. 3890290225  
C, 0, 0. 0922291396, -1. 7181613001, 7. 6834674729  
H, 0, 0. 2278504781, 0. 1950542342, 8. 6470467728  
H, 0, 0. 0127176837, -3. 5178349412, 6. 5167236881  
N, 0, -0. 2642233768, -2. 4074835214, 8. 9196009118  
O, 0, -0. 4573907558, -3. 6251142602, 8. 8672126662  
O, 0, -0. 3511490619, -1. 7364421537, 9. 951482604

1-TS3

O, 0, -2. 8680916636, -1. 6536851207, 0. 4162553764  
P, 0, -1. 2620448203, -1. 2535619291, 0. 43699653  
O, 0, -2. 101281574, 0. 6433899459, 0. 0869912691  
C, 0, -1. 6919010502, 1. 667317506, -0. 5941040582  
C, 0, -1. 1383650519, 1. 5942037352, -1. 9128023435

C, 0, -1. 8265711358, 2. 9769132509, -0. 0276488454  
C, 0, -0. 6794531894, 2. 7237006068, -2. 562610112  
H, 0, -1. 073251821, 0. 6246572665, -2. 3886435724  
C, 0, -1. 3683616816, 4. 1039084669, -0. 6792831137  
H, 0, -2. 2966387614, 3. 0505396358, 0. 9487122877  
C, 0, -0. 7621699539, 3. 9794652239, -1. 9410618498  
H, 0, -0. 2453108582, 2. 6638507107, -3. 5541851449  
H, 0, -1. 4488770604, 5. 0877857547, -0. 23142567  
N, 0, -0. 1707552018, 5. 12602046, -2. 5707073151  
O, 0, -0. 2354429449, 6. 2214578641, -1. 9905837142  
O, 0, 0. 4120064158, 4. 9702741732, -3. 657883789  
O, 0, -0. 7627362486, -0. 6203240973, 1. 7683983261  
O, 0, -0. 4478825696, -1. 1174102812, -0. 876698334  
C, 0, 1. 3639384647, 3. 1410245418, 2. 0252080947  
H, 0, 1. 2173070269, 4. 0964825243, 2. 5313547391  
C, 0, 1. 9473411494, 3. 1971424731, 0. 6984950015  
C, 0, 2. 3156011509, 4. 4761364227, 0. 2451065245  
H, 0, 2. 1581908422, 5. 3236019901, 0. 9074587644  
C, 0, 2. 8562352392, 4. 6908908031, -1. 0181403134  
C, 0, 3. 0289701722, 3. 6008200968, -1. 858153238  
H, 0, 3. 4369491802, 3. 7498941237, -2. 8541041349  
C, 0, 2. 6609869968, 2. 2973949403, -1. 4677927758  
C, 0, 2. 1011721539, 2. 0665567834, -0. 168188301  
C, 0, 2. 9078565016, 1. 2568505409, -2. 438184661  
H, 0, 3. 5017980133, 1. 5357118048, -3. 310235264  
C, 0, 2. 175066303, -1. 4249688516, -4. 2473231247  
H, 0, 2. 8158861008, -1. 9175327287, -4. 9835627406  
H, 0, 1. 5198643233, -0. 7122239817, -4. 76950295  
C, 0, 1. 3111991148, -2. 46793331, -3. 5354551083  
H, 0, 0. 5145614294, -2. 0362984477, -2. 920781669  
H, 0, 0. 8264363322, -3. 0826242531, -4. 3011916834  
C, 0, 2. 7680824634, -3. 8395034771, -0. 6948306582  
H, 0, 3. 023632398, -4. 7805765645, -1. 1851407216  
C, 0, 3. 0537348804, -3. 7548425712, 0. 7269797446  
C, 0, 3. 6899398585, -4. 873868912, 1. 2882553246  
H, 0, 3. 9349893763, -5. 7082491703, 0. 635296332  
C, 0, 4. 0175876662, -4. 9457226305, 2. 6395620664  
C, 0, 3. 6896045558, -3. 8745644988, 3. 457669759  
H, 0, 3. 9403307514, -3. 9075055282, 4. 5153526955  
C, 0, 3. 0262720178, -2. 7359681136, 2. 9602966168  
C, 0, 2. 7008104824, -2. 6426731618, 1. 5642774301  
C, 0, 2. 7538343533, -1. 6935466392, 3. 9267241233  
H, 0, 3. 2294997985, -1. 7982454722, 4. 9039002663  
C, 0, 0. 8652283716, 0. 5598729089, 5. 4652881577  
H, 0, 1. 1587191054, 1. 2156506845, 6. 2892811546  
H, 0, 0. 3834555188, -0. 3377618545, 5. 880961496  
C, 0, -0. 13079263, 1. 2838243095, 4. 5574207478  
H, 0, -0. 6041007903, 0. 6304893894, 3. 816506705  
H, 0, -0. 9315583425, 1. 6794356214, 5. 1912474447  
N, 0, 0. 9908432646, 2. 0879471156, 2. 6709249553  
N, 0, 2. 0150248562, -0. 6434498061, 3. 7670685433  
N, 0, 2. 2379561983, -2. 9310680665, -1. 4396566616  
N, 0, 2. 5195723753, 0. 0213748381, -2. 3917076891  
O, 0, 2. 1446950554, -1. 5699817884, 1. 0811799273  
O, 0, 1. 76855643, 0. 8613795041, 0. 2136302028

0, 0, 2. 0844361362, -3. 3850484557, -2. 7558612824  
0, 0, 3. 1218523689, -0. 7299017915, -3. 4327569345  
0, 0, 0. 4392530499, 2. 4264875165, 3. 9168308853  
0, 0, 2. 1281372164, 0. 2199749153, 4. 8831329713  
Zn, 0, 1. 0717259724, 0. 0582528754, 1. 9908783856  
Zn, 0, 1. 5294745114, -0. 9833309394, -0. 8215518314  
H, 0, 3. 1081398072, 5. 6916405642, -1. 3489571566  
H, 0, 4. 5182772295, -5. 8197389519, 3. 0414686948  
0, 0, -0. 8566152678, -2. 8568038328, 0. 726142278  
H, 0, -1. 312635372, -3. 1680221454, 1. 5244199655  
C, 0, -3. 9015489707, -1. 1201332351, -0. 3012275838  
C, 0, -5. 0795814734, -0. 8138532415, 0. 3894300268  
C, 0, -3. 8474368163, -1. 0257346257, -1. 6984518773  
C, 0, -6. 2053041008, -0. 4024041401, -0. 3122737826  
H, 0, -5. 0925205957, -0. 9005041858, 1. 4703772543  
C, 0, -4. 9682713248, -0. 6096738873, -2. 4028283664  
H, 0, -2. 9257843018, -1. 2748948678, -2. 211117869  
C, 0, -6. 1384601461, -0. 3039397743, -1. 7031717371  
H, 0, -7. 1299491728, -0. 1560628612, 0. 1946578726  
H, 0, -4. 9575204191, -0. 5221450183, -3. 4821438895  
N, 0, -7. 3234479322, 0. 1206769376, -2. 4454751387  
0, 0, -7. 2406975482, 0. 1894283122, -3. 674104621  
0, 0, -8. 3429514388, 0. 3840193513, -1. 8030335739

1-PC

0, 0, -0. 7613525978, 1. 5507854554, -2. 6707210003  
P, 0, 0. 5652066855, 1. 3456829295, -1. 7481640539  
0, 0, -0. 9846280909, -1. 5049221138, -1. 433451781  
C, 0, -2. 1356771678, -1. 6557445185, -0. 8361643116  
C, 0, -2. 6352965601, -0. 6893979844, 0. 0891262975  
C, 0, -2. 9655375033, -2. 7859794369, -1. 1001543417  
C, 0, -3. 8593252951, -0. 8503240406, 0. 7134406171  
H, 0, -2. 0268950828, 0. 1883727268, 0. 2824743493  
C, 0, -4. 1891149151, -2. 9492689369, -0. 4744105177  
H, 0, -2. 6109652512, -3. 52674297, -1. 8105608691  
C, 0, -4. 635774966, -1. 9851677, 0. 439121498  
H, 0, -4. 2365126154, -0. 1152934363, 1. 4151759553  
H, 0, -4. 8144187183, -3. 811981695, -0. 6730622571  
N, 0, -5. 905313393, -2. 1639300834, 1. 1067922416  
0, 0, -6. 5665344635, -3. 1785532345, 0. 8476381374  
0, 0, -6. 271586489, -1. 2964785928, 1. 9115238318  
0, 0, 1. 2067364445, 0. 0327861665, -2. 1324024168  
0, 0, 0. 1964466298, 1. 5962486848, -0. 285212406  
C, 0, -0. 2788125482, -3. 9927558172, 0. 9168288529  
H, 0, -0. 7622632468, -4. 9709814713, 0. 9256995307  
C, 0, -0. 3696766305, -3. 2262316787, 2. 1515376657  
C, 0, -0. 9284641542, -3. 9223216907, 3. 2328284278  
H, 0, -1. 2298008833, -4. 9548271682, 3. 0743834532  
C, 0, -1. 109452704, -3. 3483775661, 4. 4901596543  
C, 0, -0. 7195573134, -2. 0348778666, 4. 6694389642  
H, 0, -0. 8350937728, -1. 56358055, 5. 6423914746  
C, 0, -0. 1733014966, -1. 2697760557, 3. 6143465533  
C, 0, 0. 0042737193, -1. 8461933713, 2. 3071689343  
C, 0, 0. 2263555004, 0. 0632261841, 3. 9844399148  
H, 0, 0. 1698792594, 0. 3062711704, 5. 0468265996

C, 0, 0. 6976670493, 3. 3573200951, 3. 6137220628  
H, 0, 1. 1525253236, 4. 0200516641, 4. 3548606539  
H, 0, -0. 396276295, 3. 4115973742, 3. 7144288544  
C, 0, 1. 0978199604, 3. 8014152872, 2. 206294229  
H, 0, 0. 5228925116, 3. 3096000552, 1. 4157049187  
H, 0, 0. 907210059, 4. 8767420269, 2. 1226859543  
C, 0, 3. 9611851222, 2. 3581615611, 0. 8869206946  
H, 0, 4. 5680205582, 3. 2564893811, 1. 0158829107  
C, 0, 4. 5668996811, 1. 265494578, 0. 1508891936  
C, 0, 5. 8869005326, 1. 4794893453, -0. 2855578614  
H, 0, 6. 3736950499, 2. 414200581, -0. 0161539641  
C, 0, 6. 5789116232, 0. 5410439222, -1. 0423726789  
C, 0, 5. 93034956, -0. 6394576183, -1. 3886695612  
H, 0, 6. 4549902522, -1. 387736057, -1. 9785480598  
C, 0, 4. 6029543121, -0. 8965388694, -1. 0073603983  
C, 0, 3. 8881858327, 0. 0434738114, -0. 1938373788  
C, 0, 4. 0588405129, -2. 1764094524, -1. 4135810134  
H, 0, 4. 789403163, -2. 9173144122, -1. 7445962044  
C, 0, 1. 9401872781, -4. 3453379076, -2. 7550526485  
H, 0, 2. 1648969417, -5. 4093588886, -2. 8717251702  
H, 0, 2. 2034146951, -3. 8249745082, -3. 6878003443  
C, 0, 0. 4539638679, -4. 1591431551, -2. 4562155243  
H, 0, 0. 0894162383, -3. 1344512798, -2. 5735817201  
H, 0, -0. 1185947578, -4. 7837676725, -3. 1504424675  
N, 0, 0. 2922952437, -3. 6434887902, -0. 1806382032  
N, 0, 2. 8276555007, -2. 5728008929, -1. 4214871483  
N, 0, 2. 7672203265, 2. 3955829023, 1. 3743836036  
N, 0, 0. 6835622368, 1. 0091507288, 3. 2233328351  
0, 0, 2. 6956226284, -0. 2411341396, 0. 2271172009  
0, 0, 0. 4948641072, -1. 1441102934, 1. 3215253031  
0, 0, 2. 4974662411, 3. 6434836699, 1. 9590123855  
0, 0, 1. 1773735778, 2. 0742767092, 4. 0174989022  
0, 0, 0. 108540238, -4. 6385651566, -1. 1557201139  
0, 0, 2. 8190432842, -3. 9663867593, -1. 6981559836  
Zn, 0, 0. 9350692462, -1. 5725252471, -0. 7549365256  
Zn, 0, 1. 2902146919, 0. 8105990933, 1. 233158047  
H, 0, -1. 5427331259, -3. 9201388126, 5. 3033317605  
H, 0, 7. 600672517, 0. 7261857736, -1. 3557021863  
0, 0, 1. 5595729715, 2. 5646432094, -2. 1849163257  
H, 0, 2. 0995240746, 2. 2851453119, -2. 9434728985  
C, 0, -1. 704411573, 2. 5414051391, -2. 474304978  
C, 0, -3. 0324096323, 2. 1358067369, -2. 3101463483  
C, 0, -1. 3603293225, 3. 8977196762, -2. 5123147335  
C, 0, -4. 0304634406, 3. 0949886974, -2. 1768822087  
H, 0, -3. 259764836, 1. 0764562352, -2. 273183006  
C, 0, -2. 3570586437, 4. 8577603107, -2. 3739896799  
H, 0, -0. 3248746841, 4. 1873560745, -2. 6492433491  
C, 0, -3. 6792502029, 4. 4452389045, -2. 2095494533  
H, 0, -5. 0677910214, 2. 81433115, -2. 0426187183  
H, 0, -2. 1288828062, 5. 9160781685, -2. 3985722053  
N, 0, -4. 7273005651, 5. 4616541457, -2. 0659736098  
0, 0, -4. 3827998423, 6. 6449903506, -2. 0777886814  
0, 0, -5. 8888296417, 5. 0741119038, -1. 9410701559

2-RC



C, 0, 0. 1702156061, -2. 2879434063, 3. 2309559401  
H, 0, 0. 7318136281, -2. 6480891373, 4. 0949609112  
C, 0, -0. 0959305904, -3. 2561763, 2. 184762606  
C, 0, 0. 3675066677, -4. 5603764857, 2. 4388605043  
H, 0, 0. 8413756183, -4. 7607845258, 3. 3970119116  
C, 0, 0. 2412494976, -5. 5861909178, 1. 5108126902  
C, 0, -0. 3436087873, -5. 2971814379, 0. 2837200651  
H, 0, -0. 4470111097, -6. 0830426518, -0. 4608243058  
C, 0, -0. 7994174057, -4. 007267197, -0. 0379351966  
C, 0, -0. 7188363852, -2. 9494379718, 0. 9260412679  
C, 0, -1. 3935121603, -3. 8601778512, -1. 3508020164  
H, 0, -1. 6509276054, -4. 7863641792, -1. 8680687815  
C, 0, -1. 9934548596, -2. 4387195193, -4. 3358326384  
H, 0, -2. 6171517154, -2. 9212437993, -5. 0935582165  
H, 0, -0. 939337689, -2. 6624943295, -4. 5504746646  
C, 0, -2. 2157220824, -0. 9271294188, -4. 3535870516  
H, 0, -1. 4428860351, -0. 3604221113, -3. 831044115  
H, 0, -2. 212662772, -0. 5881879302, -5. 3945376099  
C, 0, -4. 5533112907, 0. 2096483435, -2. 071130265  
H, 0, -5. 3172931484, 0. 3705107411, -2. 8351311019  
C, 0, -4. 8907627077, 0. 6643195608, -0. 7299252451  
C, 0, -6. 2021054408, 1. 1335824885, -0. 5720502698  
H, 0, -6. 8627636899, 1. 1050320315, -1. 43542151  
C, 0, -6. 6878674651, 1. 6264048179, 0. 639165571  
C, 0, -5. 8329562408, 1. 6511126397, 1. 7256998656  
H, 0, -6. 1882764091, 2. 0163150662, 2. 6864329665  
C, 0, -4. 4940801923, 1. 2118329083, 1. 6281886022  
C, 0, -3. 9755025948, 0. 7116312276, 0. 3807071795  
C, 0, -3. 7501446965, 1. 2458153086, 2. 860210749  
H, 0, -4. 312378553, 1. 511392473, 3. 7571973513  
C, 0, -1. 0502088968, 1. 5747165368, 4. 8404193904  
H, 0, -1. 0550140453, 1. 4411986685, 5. 9256265946  
H, 0, -1. 1267693028, 2. 6488978769, 4. 6161615295  
C, 0, 0. 2517339537, 1. 0250445611, 4. 2557738261  
H, 0, 0. 4186827214, 1. 3178148894, 3. 2149953101  
H, 0, 1. 0850469775, 1. 4260304823, 4. 8429661922  
N, 0, -0. 1490266818, -1. 0383928644, 3. 2349365178  
N, 0, -2. 4990826, 0. 9598580604, 3. 0538546399  
N, 0, -3. 4560472321, -0. 3385895137, -2. 4604968964  
N, 0, -1. 6721576707, -2. 7711540176, -1. 9886306791  
O, 0, -2. 7423289607, 0. 3178225721, 0. 2664876048  
O, 0, -1. 2323730923, -1. 7800877937, 0. 6678192127  
O, 0, -3. 5056891543, -0. 5738946063, -3. 8415873638  
O, 0, -2. 4204614104, -3. 100439846, -3. 1421242816  
O, 0, 0. 3477211616, -0. 3954569546, 4. 3812858648  
O, 0, -2. 2381666589, 0. 890381762, 4. 4451374159  
H, 0, 0. 5980713914, -6. 585344628, 1. 7356352251  
H, 0, -7. 711315649, 1. 975015723, 0. 7247074984  
Zn, 0, -1. 2237429895, 0. 0120491319, 1. 6670991022  
Zn, 0, -1. 4631021841, -0. 7181721747, -1. 2921195067  
O, 0, 1. 4378548569, 7. 5071331637, -2. 2021480558  
N, 0, 1. 6776565383, 6. 9606128599, -1. 1246304118  
C, 0, 1. 7629870238, 5. 4980751704, -1. 1029448374  
O, 0, 1. 8486932846, 7. 562453187, -0. 0620388829  
C, 0, 1. 5636757712, 4. 7849162418, -2. 2867916408

C, 0, 2. 0413205904, 4. 8561176672, 0. 1040823377  
C, 0, 1. 6357454345, 3. 3966688905, -2. 2635740459  
H, 0, 1. 3507825308, 5. 3212036917, -3. 2032722652  
C, 0, 2. 1209077966, 3. 468204515, 0. 1279553257  
H, 0, 2. 1989012481, 5. 447307105, 0. 9975229781  
C, 0, 1. 9094220578, 2. 7507022662, -1. 053889098  
H, 0, 1. 4719455183, 2. 7932191585, -3. 1531807144  
H, 0, 2. 346547207, 2. 9423424971, 1. 0482803204  
O, 0, 2. 042710684, 1. 3783118095, -1. 0995629783  
P, 0, 1. 3229115093, 0. 287778251, -0. 1284800761  
O, 0, 0. 3741102519, 0. 9581470514, 0. 8643996454  
O, 0, 0. 8676629863, -0. 897873813, -0. 9313783722  
O, 0, 2. 6003231256, -0. 1334795661, 0. 84501822  
C, 0, 3. 7548026999, -0. 7656554059, 0. 4612431056  
C, 0, 3. 9103530874, -1. 4514315927, -0. 7522329866  
C, 0, 4. 8073577666, -0. 7110894221, 1. 3871791255  
C, 0, 5. 1224767993, -2. 073170449, -1. 0327658776  
H, 0, 3. 0851158912, -1. 5114629007, -1. 4505907628  
C, 0, 6. 0147863181, -1. 3353297812, 1. 1084699628  
H, 0, 4. 6577230525, -0. 1721684065, 2. 3167452253  
C, 0, 6. 1609270836, -2. 0115933865, -0. 104148732  
H, 0, 5. 2722163405, -2. 610742801, -1. 9610290668  
H, 0, 6. 8420136537, -1. 3057725964, 1. 8066776336  
N, 0, 7. 4302713554, -2. 675826825, -0. 4029871497  
O, 0, 8. 3269990759, -2. 6055528352, 0. 4398620034  
O, 0, 7. 5295876654, -3. 2693805782, -1. 4782703695  
O, 0, -0. 7978631547, 0. 9379916929, -2. 0589068944  
H, 0, -1. 4873499182, 1. 6164493382, -2. 1042438367  
O, 0, 0. 8687436132, 0. 8070185435, -4. 1464943275  
H, 0, 1. 6266718496, 0. 3876602084, -3. 7111974825  
H, 0, 0. 2337973375, 0. 9250507488, -3. 3858424092

## 2-TS1

C, 0, -0. 3479090602, -1. 6521262167, 3. 1354762091  
H, 0, 0. 1115059936, -2. 0338362564, 4. 0491362734  
C, 0, -0. 6841712345, -2. 6340529863, 2. 1227704576  
C, 0, -0. 4201346796, -3. 968810438, 2. 4778864925  
H, 0, -0. 0484003941, -4. 1696828691, 3. 4798591261  
C, 0, -0. 6079956798, -5. 0257951395, 1. 5957005928  
C, 0, -1. 0564164944, -4. 7387089563, 0. 3140908404  
H, 0, -1. 2090985517, -5. 5479260713, -0. 3960573958  
C, 0, -1. 3166760666, -3. 4216360606, -0. 1071166092  
C, 0, -1. 1590422708, -2. 3235010857, 0. 8004766347  
C, 0, -1. 8177177667, -3. 2928080451, -1. 4569990735  
H, 0, -2. 1271159461, -4. 2242636249, -1. 9344108584  
C, 0, -2. 2684978858, -1. 998003392, -4. 5423163377  
H, 0, -2. 8411177335, -2. 5489451494, -5. 2938829549  
H, 0, -1. 1987039718, -2. 1874152243, -4. 7097260661  
C, 0, -2. 5656026191, -0. 4979162827, -4. 649087852  
H, 0, -1. 8006516543, 0. 1442051688, -4. 2048499182  
H, 0, -2. 6476906413, -0. 2315724014, -5. 7085064726  
C, 0, -4. 7766054242, 0. 7625759979, -2. 3191585709  
H, 0, -5. 5794586072, 0. 8771821295, -3. 0510464542  
C, 0, -5. 0295756199, 1. 3353578544, -1. 004881691  
C, 0, -6. 3274292529, 1. 8400377618, -0. 8306038282

H, 0, -7. 0286812374, 1. 7396301845, -1. 6557057687  
C, 0, -6. 7482251511, 2. 4548668267, 0. 3460965796  
C, 0, -5. 8391299664, 2. 5655828564, 1. 3828148548  
H, 0, -6. 1417597762, 3. 0259039195, 2. 3203550016  
C, 0, -4. 5146901222, 2. 091753586, 1. 2676365308  
C, 0, -4. 0571675133, 1. 4696849134, 0. 0509873484  
C, 0, -3. 7263189372, 2. 2277081769, 2. 4666868255  
H, 0, -4. 2511153697, 2. 6156524856, 3. 341412945  
C, 0, -0. 9214195554, 2. 5177332052, 4. 3612318654  
H, 0, -0. 9528923172, 2. 5657880901, 5. 4530753602  
H, 0, -0. 8140713932, 3. 5382971606, 3. 9666568616  
C, 0, 0. 2644424321, 1. 6602830564, 3. 9092640044  
H, 0, 0. 5242488713, 1. 7989206498, 2. 8559811704  
H, 0, 1. 1412315586, 1. 945267062, 4. 5005754173  
N, 0, -0. 4830457209, -0. 3743284963, 3. 0514829265  
N, 0, -2. 4874351572, 1. 9040601687, 2. 6667478208  
N, 0, -3. 7111706551, 0. 1663436906, -2. 7226357767  
N, 0, -1. 9833686773, -2. 2294822206, -2. 1755397249  
O, 0, -2. 8282637991, 1. 0571710323, -0. 0775884047  
O, 0, -1. 4800236811, -1. 1154547292, 0. 4328321248  
O, 0, -3. 83752329, -0. 1683019174, -4. 0809735818  
O, 0, -2. 7120227495, -2. 6038067515, -3. 3327681994  
O, 0, 0. 0540792182, 0. 2704453311, 4. 177910306  
O, 0, -2. 2093024953, 1. 9868375716, 4. 0517670933  
H, 0, -0. 4004740565, -6. 0462029454, 1. 8985258944  
H, 0, -7. 7613034747, 2. 8288000684, 0. 446549386  
Zn, 0, -1. 3059803466, 0. 704463025, 1. 3739269093  
Zn, 0, -1. 6691821333, -0. 1298174564, -1. 6001988595  
O, 0, 5. 4839678862, 5. 8432268628, 2. 301744714  
N, 0, 5. 9824756724, 4. 7783682725, 1. 9303207025  
C, 0, 5. 1192168851, 3. 8294062818, 1. 2258083818  
O, 0, 7. 1583138188, 4. 4588207569, 2. 1151245482  
C, 0, 3. 7882933745, 4. 1714280833, 0. 9809968065  
C, 0, 5. 6470520836, 2. 6044953378, 0. 8136911087  
C, 0, 2. 9603015286, 3. 2737146916, 0. 316780377  
H, 0, 3. 421498136, 5. 1381156946, 1. 3037187278  
C, 0, 4. 8198658569, 1. 7032192011, 0. 1558879039  
H, 0, 6. 6849611242, 2. 3734180971, 1. 0188302217  
C, 0, 3. 4803657637, 2. 0353380926, -0. 0881604945  
H, 0, 1. 9314973406, 3. 5198784761, 0. 0870284707  
H, 0, 5. 1889563668, 0. 7373766346, -0. 1715904857  
O, 0, 2. 7415113902, 1. 1147560734, -0. 7868069317  
P, 0, 1. 1572562668, 0. 7206853097, -0. 4620202133  
O, 0, 0. 3257853843, 1. 5352528612, 0. 5538759034  
O, 0, 0. 4998881516, -0. 2127256152, -1. 477400736  
O, 0, 1. 6752680778, -0. 451382643, 0. 7311064209  
C, 0, 2. 5168374615, -1. 4868183423, 0. 5381310522  
C, 0, 2. 8335103997, -2. 0427523273, -0. 7185816331  
C, 0, 3. 0881726408, -2. 0465441934, 1. 7006361809  
C, 0, 3. 6893013419, -3. 1336666578, -0. 7987705475  
H, 0, 2. 3896201669, -1. 6277702825, -1. 6138024894  
C, 0, 3. 9384018424, -3. 1377048249, 1. 6210263847  
H, 0, 2. 8504434411, -1. 5939270214, 2. 6579850534  
C, 0, 4. 2334849733, -3. 6786425016, 0. 3662999415  
H, 0, 3. 9398353769, -3. 5769094659, -1. 7550824069

H, 0, 4. 3835146101, -3. 5748971025, 2. 5065096516  
N, 0, 5. 119443566, -4. 8312648211, 0. 2744596329  
O, 0, 5. 5730440205, -5. 2974048406, 1. 3241710348  
O, 0, 5. 3678028828, -5. 2839698246, -0. 8468734273  
O, 0, -1. 2855617803, 1. 5459759572, -2. 6743003876  
H, 0, -1. 9986820056, 2. 190716843, -2. 5538461395  
O, 0, 0. 8299769692, 2. 3063849127, -1. 7643830013  
H, 0, 1. 4684869728, 2. 1888411667, -2. 4877677121  
H, 0, -0. 1957426315, 2. 0294087105, -2. 2317545572

## 2-IM

C, 0, -0. 3417226559, 0. 6309328246, 3. 2832807799  
H, 0, -0. 9962456468, 0. 7477579385, 4. 1485764627  
C, 0, 0. 2661428252, 1. 841744436, 2. 7627016598  
C, 0, -0. 0203312206, 3. 0135240808, 3. 4842839258  
H, 0, -0. 6100485501, 2. 9261553183, 4. 3936862034  
C, 0, 0. 4106828824, 4. 2686814107, 3. 0698154864  
C, 0, 1. 1283138857, 4. 3598180153, 1. 8856904721  
H, 0, 1. 4659544147, 5. 3319533667, 1. 5344015776  
C, 0, 1. 4279435814, 3. 2254446828, 1. 1084463233  
C, 0, 1. 0274076837, 1. 9197781245, 1. 5445189417  
C, 0, 2. 1968278005, 3. 4777356011, -0. 0889151556  
H, 0, 2. 618223313, 4. 4807847335, -0. 1777534957  
C, 0, 3. 1817578341, 3. 1454348183, -3. 2959818622  
H, 0, 3. 932662369, 3. 8011965609, -3. 745375184  
H, 0, 2. 1830470988, 3. 5120868433, -3. 5728195319  
C, 0, 3. 3733316163, 1. 7126252174, -3. 803260072  
H, 0, 2. 4944100405, 1. 0768385074, -3. 669950218  
H, 0, 3. 5833329081, 1. 7413122992, -4. 877309785  
C, 0, 5. 1790304614, -0. 1864934929, -1. 5303071343  
H, 0, 6. 1229381087, -0. 1024929336, -2. 0728186931  
C, 0, 5. 1840789526, -1. 0389470132, -0. 3502744705  
C, 0, 6. 4499356522, -1. 4915708087, 0. 0539490744  
H, 0, 7. 3183615311, -1. 1535248066, -0. 5066942917  
C, 0, 6. 6288418879, -2. 3473059887, 1. 1372738451  
C, 0, 5. 5067497865, -2. 7691484766, 1. 8320349397  
H, 0, 5. 6194699062, -3. 4317773621, 2. 6867764349  
C, 0, 4. 2068289435, -2. 3633142347, 1. 4666154073  
C, 0, 4. 005340964, -1. 4834441241, 0. 3472561041  
C, 0, 3. 1515233484, -2. 857243153, 2. 3211398936  
H, 0, 3. 4728053148, -3. 4515285763, 3. 1785356036  
C, 0, -0. 0442065557, -3. 7018031649, 3. 1934412827  
H, 0, -0. 2849572063, -4. 0980206352, 4. 1834760424  
H, 0, 0. 0001781853, -4. 5375335971, 2. 4807886396  
C, 0, -1. 1238423407, -2. 7044563911, 2. 7550160442  
H, 0, -1. 1201382483, -2. 5042734263, 1. 6788780985  
H, 0, -2. 1032181537, -3. 128533711, 2. 9995803139  
N, 0, -0. 2323245185, -0. 556625783, 2. 7978681964  
N, 0, 1. 8751878243, -2. 6533857062, 2. 2367963723  
N, 0, 4. 1738334339, 0. 454431426, -2. 0124427974  
N, 0, 2. 4748474984, 2. 6745878518, -1. 0650549324  
O, 0, 2. 8047798152, -1. 133191456, -0. 0231678419  
O, 0, 1. 3859115739, 0. 864611622, 0. 8704803222  
O, 0, 4. 5131651824, 1. 0865268987, -3. 2140549467  
O, 0, 3. 4240448329, 3. 3171585715, -1. 9044268084

0, 0, -1. 0501695255, -1. 4727425613, 3. 4780713417  
0, 0, 1. 2543821388, -3. 1481297425, 3. 4066689526  
H, 0, 0. 1771098168, 5. 1547655548, 3. 6496749885  
H, 0, 7. 6211666114, -2. 6738743789, 1. 428622906  
Zn, 0, 0. 9161573427, -1. 1259884656, 1. 0776024223  
Zn, 0, 2. 0564908365, 0. 5059803119, -1. 2516635958  
0, 0, -6. 3921239665, -5. 2711686895, -1. 250286106  
N, 0, -6. 6342337533, -4. 1041512629, -1. 5703969228  
C, 0, -5. 5102257643, -3. 1789676008, -1. 6805219313  
0, 0, -7. 7645747035, -3. 6689026863, -1. 8021613572  
C, 0, -4. 2159862378, -3. 6456478653, -1. 4461318812  
C, 0, -5. 7511982992, -1. 8444880482, -2. 0180362742  
C, 0, -3. 1401335174, -2. 7723217899, -1. 5481274451  
H, 0, -4. 067838612, -4. 6887240796, -1. 1944914691  
C, 0, -4. 679589472, -0. 9695359641, -2. 1147654452  
H, 0, -6. 7677364546, -1. 5128741759, -2. 1900174963  
C, 0, -3. 3707306633, -1. 4262986992, -1. 8824969656  
H, 0, -2. 128201283, -3. 1237979319, -1. 3889304492  
H, 0, -4. 8288269019, 0. 0762802778, -2. 3606829021  
0, 0, -2. 3825553038, -0. 5053985539, -2. 0290629355  
P, 0, -0. 8095721659, -0. 6345769101, -1. 3807501236  
0, 0, -0. 2125582163, -1. 7299392465, -0. 4369949165  
0, 0, 0. 0732500483, 0. 5795023293, -1. 7725883162  
0, 0, -1. 563924325, 0. 1277103514, 0. 1173960093  
C, 0, -2. 2938864758, 1. 2438167286, 0. 1968942675  
C, 0, -2. 2649913294, 2. 2962186155, -0. 7480198027  
C, 0, -3. 1333813325, 1. 3754653474, 1. 3294674894  
C, 0, -3. 0278017446, 3. 437332965, -0. 547962103  
H, 0, -1. 6291926022, 2. 2046844973, -1. 6185886352  
C, 0, -3. 8907564508, 2. 5168689036, 1. 5318884632  
H, 0, -3. 1726275381, 0. 5501199879, 2. 033613127  
C, 0, -3. 8314622664, 3. 5503637564, 0. 590901092  
H, 0, -3. 0098300799, 4. 253408276, -1. 2606062913  
H, 0, -4. 5349815, 2. 6235771182, 2. 3963948641  
N, 0, -4. 6118832176, 4. 756839232, 0. 8023963302  
0, 0, -5. 2977895887, 4. 8335697603, 1. 8280886141  
0, 0, -4. 5477561854, 5. 6494049406, -0. 0503361634  
0, 0, 2. 0929140941, -1. 1099561244, -2. 8232101703  
H, 0, 2. 5357366755, -1. 8383865854, -2. 3592447252  
0, 0, -0. 4478151349, -1. 6486108042, -2. 7833439681  
H, 0, -0. 8868193596, -1. 2579229569, -3. 5571208388  
H, 0, 1. 1346620467, -1. 4077171388, -2. 9248088642

## 2-TS2

C, 0, -0. 2057007117, 0. 9510775085, 3. 2403222113  
H, 0, -0. 7991766414, 1. 1746850466, 4. 1281687325  
C, 0, 0. 5214929398, 2. 0624205887, 2. 6507574239  
C, 0, 0. 4311700717, 3. 273776791, 3. 356803833  
H, 0, -0. 1041327414, 3. 2774482006, 4. 303276147  
C, 0, 0. 9857605768, 4. 4588717641, 2. 8844365257  
C, 0, 1. 6276357918, 4. 4395778503, 1. 6554847371  
H, 0, 2. 057141078, 5. 3558089111, 1. 2573049304  
C, 0, 1. 7339891387, 3. 2621011826, 0. 8905450738  
C, 0, 1. 2043944125, 2. 0234902839, 1. 3833751056  
C, 0, 2. 440261462, 3. 3986110246, -0. 3611683195

H, 0, 2. 9428222235, 4. 3551865137, -0. 515685314  
C, 0, 3. 2436242182, 2. 8053505667, -3. 6039722883  
H, 0, 3. 9950455379, 3. 4064036723, -4. 1234446992  
H, 0, 2. 2458829796, 3. 1735511457, -3. 8821461435  
C, 0, 3. 3913181081, 1. 3309713048, -4. 0021960869  
H, 0, 2. 4903068133, 0. 7376883065, -3. 8241166369  
H, 0, 3. 6034409706, 1. 2704248928, -5. 0743885981  
C, 0, 5. 0874368921, -0. 492518325, -1. 5874632837  
H, 0, 6. 0420734481, -0. 5012683216, -2. 1172443312  
C, 0, 5. 0143984945, -1. 265582853, -0. 3567292063  
C, 0, 6. 239839513, -1. 7647598004, 0. 113926629  
H, 0, 7. 1424614995, -1. 513299839, -0. 4383117014  
C, 0, 6. 3350052206, -2. 5603874289, 1. 2515967502  
C, 0, 5. 1690151617, -2. 8748674454, 1. 9332967658  
H, 0, 5. 2175614061, -3. 4908436989, 2. 8281559066  
C, 0, 3. 9077389132, -2. 4186118384, 1. 5024165279  
C, 0, 3. 792087491, -1. 5986781218, 0. 3294187526  
C, 0, 2. 7949827299, -2. 8044701078, 2. 3408032836  
H, 0, 3. 0565173159, -3. 3746998392, 3. 2342296115  
C, 0, -0. 4754634295, -3. 3756485466, 3. 1876248185  
H, 0, -0. 7356435109, -3. 7834412017, 4. 1680487011  
H, 0, -0. 5337924443, -4. 1829684877, 2. 4444140212  
C, 0, -1. 4535669708, -2. 2512510415, 2. 8164661333  
H, 0, -1. 5038992045, -2. 0506450034, 1. 7413242004  
H, 0, -2. 4598113883, -2. 5470523545, 3. 1300966948  
N, 0, -0. 2700574867, -0. 2523756232, 2. 7889188275  
N, 0, 1. 5349864908, -2. 5358367292, 2. 2109411116  
N, 0, 4. 1287438475, 0. 1743435284, -2. 1253948388  
N, 0, 2. 5859885007, 2. 5420509803, -1. 3220776938  
O, 0, 2. 6204350734, -1. 2126976045, -0. 092362704  
O, 0, 1. 3782502525, 0. 9244986675, 0. 7079470455  
O, 0, 4. 5060413311, 0. 7123688688, -3. 3598982043  
O, 0, 3. 5304427968, 3. 0784273233, -2. 2386392121  
O, 0, -1. 1798816404, -1. 036069274, 3. 5190532195  
O, 0, 0. 872828505, -2. 9622325678, 3. 387994018  
H, 0, 0. 9016029296, 5. 3767761585, 3. 4556511287  
H, 0, 7. 2970082182, -2. 9256335428, 1. 5943403844  
Zn, 0, 0. 6146940091, -0. 9785189591, 0. 9730793866  
Zn, 0, 2. 0653266794, 0. 3901312464, -1. 3682549415  
0, 0, -6. 7017421815, -4. 7685678434, -0. 4199237367  
N, 0, -6. 8579872957, -3. 5766632674, -0. 696150898  
C, 0, -5. 6713605255, -2. 7958970137, -1. 0444508991  
O, 0, -7. 9469705228, -2. 9998180798, -0. 6961990394  
C, 0, -4. 4277933819, -3. 4276936519, -1. 080317771  
C, 0, -5. 8074900523, -1. 4359812162, -1. 3321018068  
C, 0, -3. 2947357822, -2. 6921573386, -1. 4078775198  
H, 0, -4. 3645083893, -4. 4863826369, -0. 8604871901  
C, 0, -4. 6760667277, -0. 6980785122, -1. 6518687807  
H, 0, -6. 7875339231, -0. 9769299204, -1. 2919609265  
C, 0, -3. 420636195, -1. 322495924, -1. 6896289613  
H, 0, -2. 3237617087, -3. 1699274901, -1. 4569881319  
H, 0, -4. 7385829158, 0. 3633095937, -1. 8651218558  
O, 0, -2. 3657202777, -0. 5350491949, -2. 0561288051  
P, 0, -0. 7727819492, -0. 8062317945, -1. 6185085175  
O, 0, -0. 2319620155, -1. 8688892276, -0. 6322790207

0, 0, 0. 1109514353, 0. 4064114281, -1. 9813845405  
0, 0, -1. 4215781881, 0. 0599088807, 0. 1361660856  
C, 0, -2. 0803186601, 1. 201043599, 0. 2872235948  
C, 0, -1. 9819823036, 2. 2868828617, -0. 6216694059  
C, 0, -2. 9288941492, 1. 3562023972, 1. 4160113109  
C, 0, -2. 6748197473, 3. 4657073861, -0. 3961754316  
H, 0, -1. 3460829586, 2. 1789330044, -1. 4911447592  
C, 0, -3. 6158149008, 2. 5367495247, 1. 6451852051  
H, 0, -3. 0313647444, 0. 5208070046, 2. 1014266162  
C, 0, -3. 4837188848, 3. 5946279689, 0. 7386973713  
H, 0, -2. 5986615329, 4. 3004680577, -1. 083088243  
H, 0, -4. 2619033263, 2. 6569525561, 2. 5068373266  
N, 0, -4. 1911255322, 4. 8375996582, 0. 9792919489  
O, 0, -4. 8830106651, 4. 9266043101, 2. 0008164144  
O, 0, -4. 0648022143, 5. 7502449045, 0. 1540661677  
O, 0, 2. 1006478629, -1. 4667356748, -2. 8943224052  
H, 0, 2. 3472702422, -2. 1071549494, -2. 2062845912  
O, 0, -0. 5564717341, -1. 8012477891, -3. 0003977366  
H, 0, -0. 9957727714, -1. 386060294, -3. 7611468779  
H, 0, 1. 1598469441, -1. 6961722487, -3. 105822185

2-PC

C, 0, 0. 3599959826, 1. 5384838368, 3. 3520136098  
H, 0, 0. 2224800337, 1. 8252330151, 4. 3966624387  
C, 0, 0. 5745780292, 2. 6239307253, 2. 4111806804  
C, 0, 0. 3399480686, 3. 9172522682, 2. 9007813704  
H, 0, -0. 0834831562, 4. 0218561706, 3. 8968040968  
C, 0, 0. 6389270928, 5. 0590574883, 2. 1608854155  
C, 0, 1. 2752154564, 4. 9000693014, 0. 9404255465  
H, 0, 1. 5960217388, 5. 7757667331, 0. 3811403795  
C, 0, 1. 5454328879, 3. 6249755309, 0. 4007483472  
C, 0, 1. 1013815696, 2. 4427773668, 1. 0869679732  
C, 0, 2. 3962051382, 3. 6068182464, -0. 7633282997  
H, 0, 2. 8312617207, 4. 5641188884, -1. 0558416472  
C, 0, 3. 7543752973, 2. 5285563631, -3. 6374473556  
H, 0, 4. 6655206181, 2. 9319328216, -4. 0877525741  
H, 0, 2. 8847799075, 2. 9978219483, -4. 1210817536  
C, 0, 3. 6922893344, 1. 0144168315, -3. 8507896404  
H, 0, 2. 7016224363, 0. 6006145947, -3. 6444702066  
H, 0, 3. 9209674142, 0. 8099498132, -4. 9029543275  
C, 0, 4. 9310503178, -1. 0526534041, -1. 3527576143  
H, 0, 5. 8687179025, -1. 2417216481, -1. 8781474885  
C, 0, 4. 6903683934, -1. 8387113559, -0. 1632920314  
C, 0, 5. 7339607274, -2. 7095159217, 0. 2030171856  
H, 0, 6. 6598294161, -2. 6732507994, -0. 3662887662  
C, 0, 5. 6056935659, -3. 6134892584, 1. 2473133374  
C, 0, 4. 3864739712, -3. 6840961617, 1. 9122874169  
H, 0, 4. 2499478693, -4. 4197567983, 2. 7012992717  
C, 0, 3. 307361082, -2. 8429631581, 1. 5930932472  
C, 0, 3. 4539674192, -1. 8498608221, 0. 568914878  
C, 0, 2. 0847549361, -3. 098837808, 2. 3308748023  
H, 0, 2. 1285626183, -3. 9236515902, 3. 0442058774  
C, 0, -1. 104657929, -2. 2818133408, 3. 3608685217  
H, 0, -1. 8877251372, -2. 9604100765, 3. 7147490512  
H, 0, -1. 4676729926, -1. 7931911486, 2. 4506299759

C, 0, -0. 8108332119, -1. 2721567166, 4. 4682912961  
H, 0, -1. 6918215373, -0. 6257606727, 4. 5985225405  
H, 0, -0. 6102325798, -1. 7892889684, 5. 4109796433  
N, 0, 0. 3732676224, 0. 2772448905, 3. 0911154674  
N, 0, 0. 9451924668, -2. 5010370351, 2. 2399953557  
N, 0, 4. 1426280339, -0. 1826283152, -1. 8918842738  
N, 0, 2. 7884843166, 2. 5804834117, -1. 4526287276  
O, 0, 2. 497492709, -0. 9976167223, 0. 3220378912  
O, 0, 1. 2271426329, 1. 261038105, 0. 5563718999  
O, 0, 4. 6817657804, 0. 3137708919, -3. 0944262042  
O, 0, 3. 8728301546, 2. 9596073216, -2. 2834340199  
O, 0, 0. 3653281721, -0. 4735764295, 4. 2974627605  
O, 0, 0. 00753091, -3. 133333436, 3. 0783519669  
H, 0, 0. 4252935118, 6. 0467092347, 2. 5539600102  
H, 0, 6. 4235663696, -4. 2731949191, 1. 5159719884  
Zn, 0, 0. 4057240166, -0. 7156147682, 1. 0877786864  
Zn, 0, 2. 3191013835, 0. 5345492868, -1. 0582986415  
O, 0, -6. 7840046547, -3. 8605106181, -1. 3203630112  
N, 0, -6. 6679740509, -2. 7888698338, -1. 9173265929  
C, 0, -5. 3299667978, -2. 1983901484, -2. 0059342418  
O, 0, -7. 5990107511, -2. 1810844191, -2. 4475229522  
C, 0, -4. 252219118, -2. 8657678268, -1. 4256050107  
C, 0, -5. 1661295878, -0. 9802469832, -2. 6665697852  
C, 0, -2. 9778596208, -2. 3145437445, -1. 5089504039  
H, 0, -4. 4219910895, -3. 8040141237, -0. 9121919603  
C, 0, -3. 8935770873, -0. 4316288001, -2. 7554277614  
H, 0, -6. 0269364556, -0. 484524216, -3. 0974341281  
C, 0, -2. 8052962667, -1. 1012438547, -2. 1847185034  
H, 0, -2. 1350821327, -2. 80554051, -1. 0399549699  
H, 0, -3. 7248742442, 0. 5152235241, -3. 2564519416  
O, 0, -1. 5845117344, -0. 4738169023, -2. 3381676846  
P, 0, -0. 1094618717, -1. 1252183712, -2. 0921594157  
O, 0, 0. 0395330917, -1. 8394748628, -0. 7698311954  
O, 0, 0. 848277673, 0. 029735834, -2. 3778172549  
O, 0, -1. 5535980844, -0. 2568345215, 0. 9197310699  
C, 0, -2. 2408420091, 0. 8542668346, 0. 9705494793  
C, 0, -2. 0449415234, 1. 9092942392, 0. 030023942  
C, 0, -3. 24802862, 1. 0503643067, 1. 9605556928  
C, 0, -2. 7743670953, 3. 0821386118, 0. 0979194539  
H, 0, -1. 3069543154, 1. 7663882568, -0. 7522691627  
C, 0, -3. 9775507653, 2. 2240501618, 2. 0317170361  
H, 0, -3. 4404672032, 0. 2435743429, 2. 6625938394  
C, 0, -3. 7340870395, 3. 2473851152, 1. 1060598588  
H, 0, -2. 6202544946, 3. 8844321511, -0. 6141980713  
H, 0, -4. 7374684874, 2. 3723984872, 2. 790090872  
N, 0, -4. 4784650864, 4. 4837445847, 1. 1907516378  
O, 0, -5. 314033999, 4. 6043210706, 2. 0964150088  
O, 0, -4. 2411218837, 5. 3686515992, 0. 3569452784  
O, 0, 2. 1391468923, -3. 721495717, -1. 5467509459  
H, 0, 1. 4698693442, -3. 1912421116, -1. 0779880226  
O, 0, 0. 0002957791, -2. 2642502221, -3. 2470607323  
H, 0, 0. 0065209916, -1. 8713665, -4. 135966281  
H, 0, 1. 6986818166, -3. 902688644, -2. 3907344977

3-RC

C, 0, 1. 4298307223, -3. 2854596217, 2. 0694498714  
H, 0, 1. 288773709, -4. 3102701711, 2. 4177577804  
C, 0, 1. 9644906475, -2. 3447575255, 3. 0363944046  
C, 0, 2. 306220338, -2. 892841242, 4. 2852726959  
H, 0, 2. 1197875048, -3. 9510886635, 4. 4517118899  
C, 0, 2. 8817039169, -2. 1324825356, 5. 2964050228  
C, 0, 3. 1343709713, -0. 7898241992, 5. 0490403268  
H, 0, 3. 6115305518, -0. 1826181187, 5. 8146002724  
C, 0, 2. 7882209625, -0. 1774989151, 3. 8306400695  
C, 0, 2. 1660212965, -0. 9451572927, 2. 7891480824  
C, 0, 3. 1613939068, 1. 219415915, 3. 7064587214  
H, 0, 3. 8201062068, 1. 6157424707, 4. 4820353913  
C, 0, 2. 6483445704, 4. 4012905916, 3. 0487985589  
H, 0, 3. 3632660892, 5. 2254809211, 3. 1234512444  
H, 0, 2. 0876283693, 4. 3309554073, 3. 9928949115  
C, 0, 1. 6624492935, 4. 6574667572, 1. 9104701797  
H, 0, 0. 826890065, 3. 9466220527, 1. 8793884112  
H, 0, 1. 2432276099, 5. 6591880965, 2. 0531595195  
C, 0, 2. 9168804829, 3. 5309119988, -1. 1330732206  
H, 0, 3. 1894861371, 4. 5278422577, -1. 4845717124  
C, 0, 3. 1896348288, 2. 4292557553, -2. 0433760252  
C, 0, 3. 8526341707, 2. 7818050124, -3. 2286954208  
H, 0, 4. 0827241363, 3. 8314280044, -3. 3946852006  
C, 0, 4. 2338021703, 1. 8416406066, -4. 1837158005  
C, 0, 3. 9546699122, 0. 507837931, -3. 9393693761  
H, 0, 4. 2685567529, -0. 2501676047, -4. 6531011719  
C, 0, 3. 2620055795, 0. 0934484723, -2. 7825416644  
C, 0, 2. 8347886563, 1. 0572750719, -1. 8048800568  
C, 0, 3. 0979643759, -1. 3349515704, -2. 6408394579  
H, 0, 3. 6652655837, -1. 9617495236, -3. 3317017579  
C, 0, 1. 4687722785, -4. 1374818394, -2. 1092619449  
H, 0, 1. 8576892076, -5. 1588896234, -2. 0749840932  
H, 0, 1. 1176045196, -3. 9254801653, -3. 1305113501  
C, 0, 0. 293524909, -3. 9899846373, -1. 1457931998  
H, 0, -0. 2229496376, -3. 0318010372, -1. 2385329397  
H, 0, -0. 4316057331, -4. 7774512187, -1. 3758033465  
N, 0, 1. 1275979618, -3. 0541642807, 0. 8370070081  
N, 0, 2. 3744644375, -1. 9618170964, -1. 770378017  
N, 0, 2. 4103898144, 3. 45281795, 0. 0475762887  
N, 0, 2. 8168169219, 2. 0409147895, 2. 773565929  
O, 0, 2. 183582785, 0. 6926230615, -0. 7330739562  
O, 0, 1. 8322729882, -0. 3926205175, 1. 6530885377  
O, 0, 2. 3132346033, 4. 7167946373, 0. 632713709  
O, 0, 3. 513627983, 3. 2659997101, 2. 9059808191  
O, 0, 0. 66224389, -4. 2215675004, 0. 2165157252  
O, 0, 2. 6309615449, -3. 3556673211, -1. 8134065211  
Zn, 0, 1. 5630435222, 1. 6850531811, 1. 0488699125  
H, 0, 3. 141479016, -2. 581446237, 6. 248845981  
H, 0, 4. 7505107595, 2. 1479266088, -5. 0866642399  
Zn, 0, 1. 2536273708, -1. 1263947561, -0. 1795071469  
O, 0, -0. 2319347786, 2. 2450312592, 1. 2671140121  
H, 0, -0. 8460091336, 1. 5484905558, 1. 5587597099  
O, 0, -2. 9754800854, 0. 0545193827, -1. 1417945813  
P, 0, -1. 9546971125, -0. 6666891814, -0. 0720962782  
O, 0, -0. 6137249379, -0. 8543494497, -0. 7857764103

O, 0, -2. 0095995507, -0. 0850187008, 1. 2973103856  
O, 0, -2. 6273015536, -2. 1737066042, -0. 1500385382  
C, 0, -3. 831987664, -2. 5604866106, 0. 3852773622  
C, 0, -4. 4682589593, -1. 8976845737, 1. 4447937335  
C, 0, -4. 3958902595, -3. 7150072886, -0. 1763221711  
C, 0, -5. 6740577573, -2. 3944410198, 1. 9286559246  
H, 0, -4. 0126860417, -1. 0166848985, 1. 8802492194  
C, 0, -5. 5958933547, -4. 2127674812, 0. 3114019179  
H, 0, -3. 8801432593, -4. 2033248143, -0. 9963058402  
C, 0, -6. 2256801913, -3. 543475038, 1. 3621340383  
H, 0, -6. 190146559, -1. 9049123193, 2. 7454085582  
H, 0, -6. 0527198331, -5. 1012694591, -0. 1063491419  
N, 0, -7. 4909458908, -4. 0635864956, 1. 882289445  
O, 0, -7. 948756334, -5. 0842153592, 1. 3636941871  
O, 0, -8. 0263298328, -3. 4537490512, 2. 8094335609  
C, 0, -2. 7106746484, 1. 1901528153, -1. 8733227208  
C, 0, -3. 3647863628, 1. 2752792736, -3. 1103386351  
C, 0, -1. 8807279458, 2. 2227253291, -1. 4193505221  
C, 0, -3. 1782362892, 2. 3889062814, -3. 9176478095  
H, 0, -4. 0089883719, 0. 459533392, -3. 420901993  
C, 0, -1. 6898213664, 3. 3329414161, -2. 2368987538  
H, 0, -1. 3807533527, 2. 1888912087, -0. 4482646466  
C, 0, -2. 3312270284, 3. 4066745816, -3. 4738155596  
H, 0, -3. 6668238087, 2. 4795074409, -4. 8797505627  
H, 0, -1. 0512315187, 4. 1471479312, -1. 9165485286  
N, 0, -2. 1108967447, 4. 5728310744, -4. 3282465222  
O, 0, -1. 3343526241, 5. 4436381585, -3. 9284710214  
O, 0, -2. 7095895094, 4. 6202141982, -5. 405585462

### 3-TS

C, 0, -1. 2696816553, -4. 6683616689, 0. 8789386927  
H, 0, -0. 9879438318, -5. 7219407248, 0. 9184119374  
C, 0, -2. 6618790976, -4. 3804642371, 0. 5902336859  
C, 0, -3. 5278130572, -5. 4736771277, 0. 4267591902  
H, 0, -3. 1264323258, -6. 4775133816, 0. 5453357172  
C, 0, -4. 8769574033, -5. 3067621895, 0. 1184046323  
C, 0, -5. 3769692318, -4. 0200521483, -0. 0494535846  
H, 0, -6. 4282719105, -3. 8769477067, -0. 2891270596  
C, 0, -4. 5511297815, -2. 8882775283, 0. 0724789665  
C, 0, -3. 170409819, -3. 0519386675, 0. 4177198154  
C, 0, -5. 1596187072, -1. 5854432315, -0. 1011614065  
H, 0, -6. 2511431176, -1. 54988745, -0. 1006884482  
C, 0, -5. 466120516, 1. 4689345434, -1. 3294881516  
H, 0, -6. 2550233861, 2. 1911712994, -1. 1018290257  
H, 0, -5. 7502832418, 0. 9130526099, -2. 2362265819  
C, 0, -4. 1524168405, 2. 2051964521, -1. 5926400048  
H, 0, -3. 3653855691, 1. 5574964825, -1. 9904807258  
H, 0, -4. 3465302267, 2. 9783590316, -2. 3437617198  
C, 0, -2. 4734034868, 2. 7984794357, 1. 3981718487  
H, 0, -2. 8318785579, 3. 8286399196, 1. 4438616691  
C, 0, -1. 5772770314, 2. 388984226, 2. 4619447585  
C, 0, -1. 1846342636, 3. 3788826197, 3. 3763460394  
H, 0, -1. 6021267016, 4. 3777952888, 3. 2709701126  
C, 0, -0. 2733024639, 3. 1231942332, 4. 4002024908  
C, 0, 0. 2890865561, 1. 856578269, 4. 4946987682

H, 0, 1. 0238364647, 1. 6496072891, 5. 2696145831  
C, 0, -0. 0512565257, 0. 8274076776, 3. 5963440713  
C, 0, -1. 051352465, 1. 0582957806, 2. 5878811724  
C, 0, 0. 6346853011, -0. 4340775673, 3. 7544085429  
H, 0, 1. 2011188598, -0. 5779881509, 4. 676622253  
C, 0, 2. 3715317221, -3. 0691184217, 2. 692123146  
H, 0, 2. 7229394527, -3. 9086956513, 3. 2976646944  
H, 0, 3. 1808882369, -2. 328920861, 2. 6095527804  
C, 0, 1. 9986458859, -3. 5552683288, 1. 2926719249  
H, 0, 1. 8006012911, -2. 7474110932, 0. 5791793362  
H, 0, 2. 8485703815, -4. 1164492415, 0. 8911300512  
N, 0, -0. 3156563235, -3. 8183682861, 1. 0819484337  
N, 0, 0. 6642008687, -1. 4223618522, 2. 9141594444  
N, 0, -2. 8702468739, 2. 1118367578, 0. 3757356432  
N, 0, -4. 5525755631, -0. 4485865742, -0. 2433664797  
O, 0, -1. 4814081682, 0. 098114727, 1. 8420904558  
O, 0, -2. 4164260775, -2. 0171790465, 0. 5954442383  
O, 0, -3. 6764842331, 2. 9165803075, -0. 4502532006  
O, 0, -5. 4973871558, 0. 6111599874, -0. 1874473822  
O, 0, 0. 9024580506, -4. 4748752318, 1. 3057159974  
O, 0, 1. 3006054827, -2. 5483256322, 3. 4890069546  
Zn, 0, -2. 4025242158, 0. 0229748097, -0. 1357430352  
H, 0, -5. 5253198022, -6. 1690609064, 0. 0072216086  
H, 0, 0. 0057780895, 3. 9058485055, 5. 0971282412  
Zn, 0, -0. 4438272313, -1. 668514093, 1. 1309530438  
O, 0, -1. 9347750767, -0. 1524421555, -2. 2580492741  
H, 0, -2. 4319949636, -0. 7774154909, -2. 8108765407  
O, 0, 0. 4993063188, 0. 1527901079, -2. 8481006917  
P, 0, -0. 3334568882, -0. 9754916638, -1. 9511735044  
O, 0, -0. 4894593473, -0. 4724935739, -0. 4471153898  
O, 0, -0. 7161447197, -2. 3039584605, -2. 538677121  
O, 0, 1. 4244225268, -1. 5120136136, -1. 318588677  
C, 0, 2. 4032148997, -2. 0273864824, -2. 0592576751  
C, 0, 2. 2076283086, -2. 7592545654, -3. 2566263304  
C, 0, 3. 7308356985, -1. 8573596497, -1. 5881783507  
C, 0, 3. 2909294635, -3. 2901275423, -3. 9406770272  
H, 0, 1. 1964747598, -2. 9256082186, -3. 6046026187  
C, 0, 4. 811645024, -2. 3929583948, -2. 2675304444  
H, 0, 3. 8807559401, -1. 2713285867, -0. 6855732742  
C, 0, 4. 5877402224, -3. 1107579262, -3. 4475912775  
H, 0, 3. 1505464663, -3. 8575039976, -4. 8532311799  
H, 0, 5. 8270958704, -2. 2605866626, -1. 9135812778  
N, 0, 5. 7154609991, -3. 6802185187, -4. 1621498069  
O, 0, 6. 8465307435, -3. 5201380361, -3. 6872555999  
O, 0, 5. 4913342615, -4. 2999307406, -5. 207834923  
C, 0, 0. 1247082139, 0. 6041556589, -4. 081471135  
C, 0, 0. 4679845439, 1. 928335973, -4. 3906604552  
C, 0, -0. 5069145972, -0. 2075869269, -5. 0372459892  
C, 0, 0. 1677186916, 2. 4509050761, -5. 6411933823  
H, 0, 0. 9692535709, 2. 5266331847, -3. 6373755945  
C, 0, -0. 8122795619, 0. 3165298108, -6. 2871770359  
H, 0, -0. 7380840811, -1. 2390274862, -4. 7958947374  
C, 0, -0. 4789629588, 1. 6408096984, -6. 5768777785  
H, 0, 0. 4192088894, 3. 4712103564, -5. 9030660994  
H, 0, -1. 2982699916, -0. 285919966, -7. 0449045507

N, 0, -0. 8153318586, 2. 1926409878, -7. 8882654277  
O, 0, -1. 4002285849, 1. 4597166941, -8. 6889559801  
O, 0, -0. 501096517, 3. 3626152581, -8. 1185150851

### 3-PC

C, 0, 0. 6420389635, -2. 8705317843, 2. 6596750306  
H, 0, 0. 2310395316, -3. 6124604348, 3. 3465493842  
C, 0, 1. 1141900832, -1. 6339082466, 3. 2560989623  
C, 0, 1. 0396324197, -1. 5801242147, 4. 6577519456  
H, 0, 0. 5968885246, -2. 4239635313, 5. 1812825747  
C, 0, 1. 5258886219, -0. 5017430549, 5. 3898830199  
C, 0, 2. 1209935447, 0. 5436061743, 4. 7014415714  
H, 0, 2. 5436716436, 1. 3803833975, 5. 2525011396  
C, 0, 2. 1952814032, 0. 5630555967, 3. 2947659115  
C, 0, 1. 6567924527, -0. 5244010887, 2. 5261322375  
C, 0, 2. 8954896702, 1. 6963540418, 2. 7307342483  
H, 0, 3. 4494762976, 2. 3258317443, 3. 4300445386  
C, 0, 3. 2691809628, 4. 2880821403, 0. 7746477323  
H, 0, 4. 1258922333, 4. 9591234597, 0. 6680991283  
H, 0, 2. 5757013612, 4. 7067264642, 1. 5183836815  
C, 0, 2. 5259400399, 4. 161354064, -0. 5533390515  
H, 0, 1. 5803973681, 3. 623754981, -0. 4653262704  
H, 0, 2. 2964261961, 5. 1723220868, -0. 9053078252  
C, 0, 3. 9083457652, 1. 7045941194, -2. 5971620527  
H, 0, 4. 4075764572, 2. 4277614622, -3. 2445287434  
C, 0, 4. 1093240411, 0. 3038588392, -2. 9211380735  
C, 0, 4. 9749282669, 0. 0523854977, -3. 9993221679  
H, 0, 5. 3813024699, 0. 9025600859, -4. 5419362238  
C, 0, 5. 3392214587, -1. 2361354209, -4. 3758196853  
C, 0, 4. 8463077325, -2. 3017422135, -3. 6368979109  
H, 0, 5. 1530165417, -3. 3156637917, -3. 882572683  
C, 0, 3. 9498028558, -2. 1147152402, -2. 5675695775  
C, 0, 3. 523792634, -0. 7924821307, -2. 2037382328  
C, 0, 3. 585694363, -3. 314347077, -1. 8405468479  
H, 0, 4. 1781991503, -4. 2082568013, -2. 0461880233  
C, 0, 1. 5637976591, -5. 5096354505, -0. 5353504661  
H, 0, 1. 7729540793, -6. 393251911, 0. 0737702497  
H, 0, 1. 5117802453, -5. 8107210555, -1. 5928386037  
C, 0, 0. 2236809211, -4. 897514394, -0. 1410746685  
H, 0, -0. 0631914973, -4. 0672123487, -0. 791649837  
H, 0, -0. 5432345194, -5. 6733189053, -0. 2300151613  
N, 0, 0. 6879832604, -3. 2054208213, 1. 4159881932  
N, 0, 2. 6551348715, -3. 4343772572, -0. 9541036086  
N, 0, 3. 2413581151, 2. 18999872, -1. 6061900021  
N, 0, 2. 9561102208, 2. 0380715197, 1. 4858252488  
O, 0, 2. 6732621832, -0. 6002409458, -1. 2296594901  
O, 0, 1. 7152623243, -0. 5243121699, 1. 21938624  
O, 0, 3. 3277503579, 3. 5862113909, -1. 591620773  
O, 0, 3. 8785988708, 3. 0940958588, 1. 2848258112  
O, 0, 0. 1739923841, -4. 4945494904, 1. 2307590006  
O, 0, 2. 724074269, -4. 6971515538, -0. 313797427  
Zn, 0, 2. 064023788, 1. 0609922518, -0. 1643737226  
H, 0, 1. 4598308934, -0. 4912340636, 6. 4722668469  
H, 0, 6. 0137782698, -1. 4005734516, -5. 2089202576  
Zn, 0, 1. 2954947734, -1. 9383130418, -0. 2467202941

O, 0, -0.5550187783, 3.6475784477, 1.0381374219  
H, 0, -0.9157231383, 3.7635526361, 1.9323058819  
O, 0, -2.1529330645, 2.2501210242, -0.4109719234  
P, 0, -0.8305801799, 2.0976332578, 0.5604353077  
O, 0, 0.2640019083, 1.7984059231, -0.4695669334  
O, 0, -1.0446156363, 1.2199284294, 1.7484223775  
O, 0, -0.1734208816, -1.9187947013, -1.5062598818  
C, 0, -1.4896584346, -1.9078926663, -1.4251963497  
C, 0, -2.1956873818, -1.407521448, -0.2992702738  
C, 0, -2.250333227, -2.4301695656, -2.5060174129  
C, 0, -3.580446177, -1.4519503436, -0.2505686868  
H, 0, -1.6433834334, -0.959354889, 0.5219581711  
C, 0, -3.632339156, -2.4741658325, -2.4584454759  
H, 0, -1.7130400249, -2.7965313802, -3.3761023544  
C, 0, -4.2975820931, -1.9914109948, -1.3244216303  
H, 0, -4.1229194955, -1.0697903954, 0.6058845804  
H, 0, -4.2141381779, -2.8778993353, -3.2785831749  
N, 0, -5.7442502225, -2.0537333724, -1.2632237515  
O, 0, -6.3492153362, -2.5293727419, -2.2324052094  
O, 0, -6.3049148294, -1.6332898692, -0.244139535  
C, 0, -3.4045733979, 2.6154771443, 0.0136938837  
C, 0, -4.1902472337, 3.3072083506, -0.9191276754  
C, 0, -3.9131081864, 2.3038733074, 1.2837634783  
C, 0, -5.4760800095, 3.7071348155, -0.5836007255  
H, 0, -3.7720715691, 3.5210143834, -1.8967558843  
C, 0, -5.2001264742, 2.7107912693, 1.6211251337  
H, 0, -3.3061990497, 1.7369167244, 1.9800110595  
C, 0, -5.9655588586, 3.4121352983, 0.6904609957  
H, 0, -6.1019250401, 4.2461529575, -1.2838721115  
H, 0, -5.6221651995, 2.4849300541, 2.5926566399  
N, 0, -7.3116175404, 3.8538266586, 1.0586722783  
O, 0, -7.7076028207, 3.6032090534, 2.1985402861  
O, 0, -7.9695953843, 4.4593857948, 0.2104264818

4-RC

C, 0, -0.297190856, -3.8442372526, 1.1410912025  
H, 0, 0.2689883495, -4.7472167391, 1.3765923562  
C, 0, -1.4830381523, -4.0229679305, 0.3240124879  
C, 0, -1.7952612743, -5.3551079411, 0.0006451806  
H, 0, -1.1246911001, -6.1388822171, 0.3447006045  
C, 0, -2.9310770769, -5.6965942489, -0.7243026452  
C, 0, -3.7867323608, -4.6797477764, -1.1251589316  
H, 0, -4.6984095892, -4.9248802585, -1.6648586227  
C, 0, -3.5123724263, -3.3258099755, -0.8582210232  
C, 0, -2.3258127418, -2.9571692458, -0.1394006608  
C, 0, -4.5276388879, -2.386309821, -1.2939938125  
H, 0, -5.4776214567, -2.8151760513, -1.6195260506  
C, 0, -5.6643463256, 0.2793025997, -2.8300644158  
H, 0, -6.6958256111, 0.637022912, -2.8936173484  
H, 0, -5.4521192333, -0.350432266, -3.7072940513  
C, 0, -4.6953450605, 1.4593545163, -2.825624279  
H, 0, -3.6436139, 1.1631234541, -2.9130835844  
H, 0, -4.9348283317, 2.0907559376, -3.6879910712  
C, 0, -4.1693888542, 2.7514589777, 0.3562871613  
H, 0, -4.7918386866, 3.6314886707, 0.1864130511

C, 0, -3.5230331852, 2.6609176872, 1.6562762765  
C, 0, -3.8601883942, 3.6765250735, 2.5636103616  
H, 0, -4.5383633763, 4.4577544959, 2.2290918184  
C, 0, -3.3719602188, 3.7112826508, 3.8681509505  
C, 0, -2.5317169223, 2.6918888647, 4.2815180473  
H, 0, -2.1606770234, 2.6767778152, 5.3035037432  
C, 0, -2.1297783566, 1.6608073789, 3.4066614443  
C, 0, -2.6005905637, 1.6328004792, 2.0490356248  
C, 0, -1.300785607, 0.6369639355, 3.9994936848  
H, 0, -1.2119841759, 0.6496976522, 5.0875566347  
C, 0, 1.2903249111, -1.3532275068, 4.2516985791  
H, 0, 1.5028679419, -2.118617936, 5.0031250391  
H, 0, 1.7601411344, -0.40838934, 4.5644789941  
C, 0, 1.87191899, -1.7652712111, 2.9017789574  
H, 0, 1.8079051848, -0.9787396688, 2.1462438485  
H, 0, 2.9326751885, -1.9938676932, 3.0482798021  
N, 0, 0.1479024865, -2.7431444615, 1.6438332072  
N, 0, -0.6691308507, -0.3135541786, 3.3898175053  
N, 0, -4.1059448263, 1.8970088744, -0.602875758  
N, 0, -4.4418872706, -1.0993718393, -1.3226433639  
O, 0, -2.2312752816, 0.6874930952, 1.2246461898  
O, 0, -2.0535463703, -1.704071177, 0.1112529285  
O, 0, -4.8823805276, 2.3100599436, -1.6882786191  
O, 0, -5.6958213009, -0.5246161666, -1.6434002989  
O, 0, 1.3041476578, -2.9787521839, 2.4000309726  
O, 0, -0.1353867491, -1.2425832329, 4.3183621947  
Zn, 0, -0.6875248028, -0.754742697, 1.3228878923  
Zn, 0, -2.7828432671, 0.1618811581, -0.752261513  
H, 0, -3.1515310947, -6.7331972306, -0.9545784044  
H, 0, -3.657585665, 4.5087157453, 4.5453881633  
O, 0, 2.9088939478, 6.455847331, 2.0945772079  
N, 0, 3.7259149668, 5.5591502218, 1.8791152072  
C, 0, 3.3125133882, 4.4482153913, 1.0161682985  
O, 0, 4.866872023, 5.5319219231, 2.3453478903  
C, 0, 2.023868918, 4.4457347003, 0.4783115708  
C, 0, 4.2219006736, 3.4222574775, 0.7560166202  
C, 0, 1.6234767906, 3.3874344058, -0.3322198786  
H, 0, 1.3528323974, 5.2671017854, 0.6976855034  
C, 0, 3.823622466, 2.3633844203, -0.0532608757  
H, 0, 5.2161476201, 3.467956583, 1.1826439937  
C, 0, 2.5283328842, 2.3512020948, -0.5807387118  
H, 0, 0.6276909254, 3.3571332243, -0.7797593845  
H, 0, 4.5069262841, 1.5541542929, -0.2869112272  
O, 0, 2.1468743577, 1.3257007555, -1.4308097593  
P, 0, 1.5363897344, -0.0943221829, -0.9012533855  
O, 0, 0.8341408832, 0.1579557877, 0.4341295875  
O, 0, 0.8471629322, -0.7862539772, -2.024347304  
O, 0, 2.9064476658, -0.9000618146, -0.4077628138  
C, 0, 3.8778820103, -1.4296230907, -1.2201725764  
C, 0, 3.6684849401, -1.7909892555, -2.5593709456  
C, 0, 5.1272675993, -1.6318883489, -0.6140140728  
C, 0, 4.7178036969, -2.3462798775, -3.2841174783  
H, 0, 2.6945205645, -1.6426548278, -3.0095720193  
C, 0, 6.1718881824, -2.1906242237, -1.3375278531  
H, 0, 5.2573188122, -1.3466418957, 0.4248128063

C, 0, 5. 955293159, -2. 5420933292, -2. 6707878751  
H, 0, 4. 5875062762, -2. 6351098137, -4. 3198610784  
H, 0, 7. 1451428401, -2. 3560081601, -0. 8924142358  
N, 0, 7. 05154695, -3. 1338977531, -3. 4393687687  
O, 0, 8. 1319465256, -3. 2943669202, -2. 867724403  
O, 0, 6. 8321268447, -3. 4394371936, -4. 6126163212  
O, 0, -1. 678718302, 0. 6806171448, -2. 2201549107  
H, 0, -0. 8798923899, 0. 1370523797, -2. 35164888  
O, 0, -1. 1908219904, 3. 2795613895, -1. 8421902725  
H, 0, -0. 9050718355, 3. 6313063941, -2. 6988050304  
H, 0, -1. 2992768315, 2. 2970492914, -2. 0103490746

#### 4-TS

C, 0, -0. 8745593634, -4. 534352618, 0. 3962255795  
H, 0, -0. 5879733845, -5. 5808997045, 0. 5139226555  
C, 0, -2. 2889073068, -4. 2787110683, 0. 2206888059  
C, 0, -3. 1390871212, -5. 3952140843, 0. 289842178  
H, 0, -2. 6931131498, -6. 3793958762, 0. 4137834927  
C, 0, -4. 5234271863, -5. 2713727959, 0. 2239169808  
C, 0, -5. 0721719735, -3. 9991263678, 0. 1119038194  
H, 0, -6. 1531973497, -3. 878629164, 0. 1070579531  
C, 0, -4. 2705186881, -2. 848405335, 0. 0062655643  
C, 0, -2. 8400156263, -2. 9693462193, 0. 0232788546  
C, 0, -4. 9653730202, -1. 5743398855, -0. 0089274155  
H, 0, -6. 0201050014, -1. 5916292793, 0. 2748461592  
C, 0, -5. 7165771051, 1. 458204397, -1. 0721267359  
H, 0, -6. 3922999698, 2. 1855512018, -0. 6128937757  
H, 0, -6. 2730970441, 0. 8937410833, -1. 8366783591  
C, 0, -4. 5523873359, 2. 1705271079, -1. 7545107676  
H, 0, -3. 9185954647, 1. 4821979991, -2. 3219321411  
H, 0, -4. 9723042204, 2. 9021628307, -2. 4531352956  
C, 0, -2. 4574546503, 2. 8482813159, 0. 9143416139  
H, 0, -2. 8452277856, 3. 8642711753, 1. 0029784071  
C, 0, -1. 521263147, 2. 4354992688, 1. 942348144  
C, 0, -1. 2013979486, 3. 3941738452, 2. 9162693313  
H, 0, -1. 6422729627, 4. 3844261493, 2. 8315287649  
C, 0, -0. 3326176832, 3. 1175127279, 3. 9715530647  
C, 0, 0. 2362635471, 1. 8547295563, 4. 0527448116  
H, 0, 0. 9076766215, 1. 6171077297, 4. 8749896002  
C, 0, -0. 016666162, 0. 8636746798, 3. 083304371  
C, 0, -0. 9237926382, 1. 1324858734, 1. 9993066513  
C, 0, 0. 6242052124, -0. 4153649885, 3. 2842866323  
H, 0, 1. 0464209613, -0. 6062139004, 4. 2731270141  
C, 0, 2. 4411342843, -3. 0609271573, 2. 463034798  
H, 0, 2. 6384100743, -3. 946264885, 3. 0737652967  
H, 0, 3. 2653018259, -2. 3460981447, 2. 5960408736  
C, 0, 2. 3632675968, -3. 4489425116, 0. 9884494076  
H, 0, 2. 2959833111, -2. 5852021443, 0. 325791148  
H, 0, 3. 2789183142, -3. 9893331355, 0. 7288079167  
N, 0, 0. 0905679263, -3. 6776018937, 0. 4803581749  
N, 0, 0. 7461319334, -1. 3749234184, 2. 4207151019  
N, 0, -2. 8832294048, 2. 1638711725, -0. 0953979222  
N, 0, -4. 4599348224, -0. 4187284098, -0. 2859975366  
O, 0, -1. 2170798203, 0. 2196184608, 1. 1289752257  
O, 0, -2. 063235548, -1. 9386524002, -0. 1099376075

O, 0, -3. 764756452, 2. 9577932196, -0. 8573711821  
O, 0, -5. 3934270809, 0. 6027265116, 0. 0297863543  
O, 0, 1. 3009703123, -4. 3558514161, 0. 7032654061  
O, 0, 1. 2365398561, -2. 5495754911, 3. 0467071166  
Zn, 0, -0. 0640018145, -1. 4671222966, 0. 4539631283  
Zn, 0, -2. 323846849, 0. 1041200457, -0. 7301491707  
H, 0, -5. 1608995828, -6. 146628685, 0. 2867993393  
H, 0, -0. 1082910465, 3. 8765876739, 4. 7128126702  
O, 0, -0. 8692509215, 6. 1241050531, 0. 5921034495  
N, 0, 0. 3125701516, 5. 7655672265, 0. 6596846085  
C, 0, 0. 7279603194, 4. 6348390778, -0. 165432144  
O, 0, 1. 1505617077, 6. 2858526915, 1. 3970520008  
C, 0, -0. 1342646741, 4. 1593222488, -1. 1553064314  
C, 0, 1. 959833743, 4. 0277667101, 0. 0875076238  
C, 0, 0. 2235739487, 3. 030017851, -1. 8814944363  
H, 0, -1. 0724736055, 4. 6677494216, -1. 3411538906  
C, 0, 2. 3064187389, 2. 8878626804, -0. 6271007492  
H, 0, 2. 6105937854, 4. 4375383063, 0. 8501930191  
C, 0, 1. 427290874, 2. 3718568532, -1. 5905208445  
H, 0, -0. 4080553178, 2. 6431102614, -2. 6712032346  
H, 0, 3. 2439373228, 2. 3753577373, -0. 4428586642  
O, 0, 1. 8148720001, 1. 2545171019, -2. 2795560521  
P, 0, 1. 0610739338, -0. 2246018361, -2. 1905100907  
O, 0, -0. 1445339813, -0. 3230710644, -1. 2039589666  
O, 0, 1. 5538666049, -1. 2377707217, -3. 1693400036  
O, 0, 2. 1280421364, -0. 6447396869, -0. 7174826566  
C, 0, 3. 4776935233, -0. 6381390939, -0. 7156275178  
C, 0, 4. 2589316445, -1. 0093253766, -1. 8302229737  
C, 0, 4. 1243470185, -0. 2772058532, 0. 4870832293  
C, 0, 5. 6441137402, -1. 0167921766, -1. 7344951499  
H, 0, 3. 7547397935, -1. 292942193, -2. 7459079706  
C, 0, 5. 5092025053, -0. 2920241337, 0. 5848051334  
H, 0, 3. 5132145654, 0. 0269593795, 1. 3315499765  
C, 0, 6. 2617187038, -0. 664310767, -0. 5310815473  
H, 0, 6. 2598981618, -1. 301668096, -2. 5792096299  
H, 0, 6. 0175271136, -0. 0135088571, 1. 5000591014  
N, 0, 7. 7168919268, -0. 6865058567, -0. 4339898732  
O, 0, 8. 2280401597, -0. 3816643437, 0. 6480441984  
O, 0, 8. 3587789148, -1. 0112341787, -1. 4358578319  
O, 0, -2. 5101293949, 0. 0464732387, -2. 7453209935  
H, 0, -2. 7783602386, -0. 8467754245, -3. 0119516661  
O, 0, -0. 2467725511, 0. 4995550152, -3. 5123459139  
H, 0, 0. 0016430987, 0. 0254843615, -4. 3235093752  
H, 0, -1. 3176135188, 0. 2416716948, -3. 2103742313

#### 4-PC

C, 0, -0. 9375127383, -4. 6679900238, 0. 1411703302  
H, 0, -0. 7414882613, -5. 7383188526, 0. 2282260129  
C, 0, -2. 3329507305, -4. 2900650002, 0. 0160048025  
C, 0, -3. 2683668649, -5. 3324374211, 0. 0817571648  
H, 0, -2. 9005881564, -6. 3550026197, 0. 125520702  
C, 0, -4. 6420100285, -5. 0953433168, 0. 1220749733  
C, 0, -5. 0856357135, -3. 7818066971, 0. 1371741362  
H, 0, -6. 148823291, -3. 5723705564, 0. 2315948776  
C, 0, -4. 194877403, -2. 6931963348, 0. 0367482026



C, 0, -2. 7803277895, -2. 931370807, -0. 0826815332  
C, 0, -4. 7833916252, -1. 3756174224, 0. 1731326343  
H, 0, -5. 809613711, -1. 3339362815, 0. 5449748475  
C, 0, -5. 3929983237, 1. 7481623762, -0. 6435026  
H, 0, -5. 9068936202, 2. 5366767953, -0. 0866603666  
H, 0, -6. 1152594052, 1. 2640389481, -1. 3193786188  
C, 0, -4. 2804346082, 2. 3487790974, -1. 5018024129  
H, 0, -3. 8232979063, 1. 5931455429, -2. 1452513717  
H, 0, -4. 7349597329, 3. 1065575344, -2. 1483974479  
C, 0, -1. 873285609, 2. 8054060124, 0. 9155223634  
H, 0, -2. 1380198136, 3. 8579025869, 1. 0262318098  
C, 0, -0. 9757534535, 2. 2678044298, 1. 9172615013  
C, 0, -0. 5821395318, 3. 1508263661, 2. 9393428429  
H, 0, -0. 8915125585, 4. 1911695162, 2. 8728711039  
C, 0, 0. 1801852647, 2. 7256181087, 4. 0226219767  
C, 0, 0. 5433021656, 1. 3847752423, 4. 1003757715  
H, 0, 1. 1024560249, 1. 0279461477, 4. 9624776139  
C, 0, 0. 2192184875, 0. 469021011, 3. 0847185352  
C, 0, -0. 5309567489, 0. 9054652397, 1. 9425611911  
C, 0, 0. 5997696748, -0. 9181690047, 3. 2924820549  
H, 0, 0. 8543717918, -1. 2144762745, 4. 3126725497  
C, 0, 2. 1001716173, -3. 7318845945, 2. 5651979261  
H, 0, 2. 0574667475, -4. 6912229199, 3. 0891829441  
H, 0, 2. 9601376146, -3. 1589788808, 2. 9434992162  
C, 0, 2. 2927061483, -3. 9493819219, 1. 0668099141  
H, 0, 2. 4444869177, -3. 0180519113, 0. 5212719432  
H, 0, 3. 1780743458, -4. 5779884131, 0. 9273756369  
N, 0, 0. 0916164703, -3. 8969962151, 0. 2507096838  
N, 0, 0. 654199061, -1. 8345063583, 2. 3846264233  
N, 0, -2. 43307105, 2. 1801559888, -0. 0687113148  
N, 0, -4. 2080878634, -0. 2439656835, -0. 067380988  
O, 0, -0. 8293503137, 0. 0828961421, 0. 9822923913  
O, 0, -1. 9260839489, -1. 9681822382, -0. 2568230619  
O, 0, -3. 2863863852, 3. 0635566877, -0. 7716854953  
O, 0, -5. 0062186463, 0. 8361708732, 0. 3903649259  
O, 0, 1. 2326704032, -4. 692528939, 0. 4593587363  
O, 0, 0. 8759090874, -3. 1061133501, 2. 9753017209  
Zn, 0, 0. 2150827132, -1. 6120962715, 0. 1947808391  
Zn, 0, -2. 1400145208, 0. 0966087821, -0. 6684419336  
H, 0, -5. 3440194199, -5. 9200768058, 0. 1804724965  
H, 0, 0. 4678877102, 3. 4229157557, 4. 8017788435  
O, 0, -0. 218832276, 6. 0023746397, 0. 3609991549  
N, 0, 0. 9373302836, 5. 5975656247, 0. 1830538585  
C, 0, 1. 1244815441, 4. 4528472909, -0. 7046841412  
O, 0, 1. 9302784744, 6. 0822603676, 0. 7235666343  
C, 0, 0. 0644183613, 4. 045211749, -1. 514500437  
C, 0, 2. 3391620703, 3. 7629617477, -0. 6843522586  
C, 0, 0. 2034709542, 2. 8964687109, -2. 2832798788  
H, 0, -0. 8565688323, 4. 6148112172, -1. 5249962936  
C, 0, 2. 4673642592, 2. 6022486059, -1. 4372328256  
H, 0, 3. 1487557118, 4. 1175196072, -0. 0582280715  
C, 0, 1. 3861506619, 2. 1490925706, -2. 2045544812  
H, 0, -0. 6001937236, 2. 5695631578, -2. 9317580455  
H, 0, 3. 3789484143, 2. 0170687929, -1. 4164017474  
O, 0, 1. 5607053701, 0. 9792147264, -2. 9013717995

P, 0, 0. 4680351532, -0. 2508121275, -2. 9712335836  
O, 0, -0. 3120521521, -0. 2860315383, -1. 6465335191  
O, 0, 1. 0867775504, -1. 4362701936, -3. 5983965776  
O, 0, 2. 0417422357, -1. 3047498553, -0. 4888900328  
C, 0, 3. 1863645165, -0. 7111965291, -0. 274246841  
C, 0, 4. 2082431498, -0. 7927246995, -1. 2656440282  
C, 0, 3. 4847712916, 0. 0109401159, 0. 916144797  
C, 0, 5. 4426917097, -0. 1997475535, -1. 0757439172  
H, 0, 3. 9751941976, -1. 3255780943, -2. 182113287  
C, 0, 4. 7225373656, 0. 6039795136, 1. 1071585835  
H, 0, 2. 7165148363, 0. 1069499941, 1. 676273656  
C, 0, 5. 7034860496, 0. 4978584529, 0. 1144042481  
H, 0, 6. 2192497441, -0. 2609280472, -1. 8292284496  
H, 0, 4. 9502683389, 1. 1549529379, 2. 0123533076  
N, 0, 6. 9971670879, 1. 1137970382, 0. 318700619  
O, 0, 7. 1950407397, 1. 7208990223, 1. 3797381449  
O, 0, 7. 844150035, 1. 0048858008, -0. 5766711433  
O, 0, -2. 9538762104, -0. 3141336146, -2. 7315495452  
H, 0, -3. 0221068717, -1. 2834361143, -2. 7346715092  
O, 0, -0. 6932807806, 0. 3861112775, -4. 014126414  
H, 0, -0. 4438597049, 0. 1526386291, -4. 9250293733  
H, 0, -2. 2057244081, -0. 1042394925, -3. 3475075971

5-RC

C, 0, 0. 2437237248, -2. 1786054606, 2. 8989516909  
H, 0, -0. 2743059316, -2. 8817212465, 3. 553990971  
C, 0, 1. 099252493, -1. 1972875012, 3. 5428490886  
C, 0, 1. 2473709854, -1. 3075002776, 4. 9353930812  
H, 0, 0. 7197173163, -2. 1069240893, 5. 4510349107  
C, 0, 2. 0495976459, -0. 4342632681, 5. 6646210174  
C, 0, 2. 7228798348, 0. 5779914191, 4. 9893300722  
H, 0, 3. 3642950734, 1. 2595705467, 5. 5434869729  
C, 0, 2. 598524071, 0. 7534248568, 3. 6001657232  
C, 0, 1. 7687617983, -0. 1363527502, 2. 8407542532  
C, 0, 3. 374742676, 1. 8252761495, 3. 0072363909  
H, 0, 4. 0753969464, 2. 3331352315, 3. 6734018125  
C, 0, 3. 9815735444, 4. 3645828499, 0. 9139856541  
H, 0, 4. 8924339672, 4. 9699269842, 0. 9054815767  
H, 0, 3. 2115188842, 4. 8919172462, 1. 4964810534  
C, 0, 3. 4763395492, 4. 1760893883, -0. 5171574411  
H, 0, 2. 4748269706, 3. 7343139769, -0. 5540707408  
H, 0, 3. 413204202, 5. 1631994719, -0. 9871223376  
C, 0, 5. 0733181211, 1. 372488754, -1. 8139904372  
H, 0, 5. 8152923736, 1. 9422243784, -2. 3776014346  
C, 0, 5. 1156254715, -0. 072480674, -1. 9358440736  
C, 0, 5. 9615897786, -0. 6193474934, -2. 9107742709  
H, 0, 6. 6093121547, 0. 0500244238, -3. 4738098572  
C, 0, 5. 9797393055, -1. 9869014838, -3. 1901020615  
C, 0, 5. 0779269331, -2. 8174125013, -2. 5323374212  
H, 0, 5. 0337969903, -3. 873328962, -2. 7927129839  
C, 0, 4. 184034952, -2. 3219820002, -1. 5647603005  
C, 0, 4. 287029182, -0. 9459788119, -1. 1313741428  
C, 0, 3. 1927858539, -3. 2502405372, -1. 0585006684  
H, 0, 3. 437465429, -4. 31173698, -1. 1455052491  
C, 0, 0. 1409528321, -4. 4757665111, -0. 5731733619

H, 0, -0.0488992238, -5.4913423346, -0.2142468801  
H, 0, 0.1247347533, -4.4845375953, -1.673477531  
C, 0, -0.9618147247, -3.545873728, -0.0506701814  
H, 0, -1.0041829433, -2.5783290644, -0.5692484  
H, 0, -1.9308302758, -4.0269801793, -0.2169893197  
N, 0, 0.0376184429, -2.3095644194, 1.6324717235  
N, 0, 2.0187252474, -2.9946976963, -0.5643220842  
N, 0, 4.1933948874, 2.054927919, -1.1565872572  
N, 0, 3.3583375929, 2.2397165337, 1.7817303522  
O, 0, 3.6740541986, -0.5377165186, -0.0894554593  
O, 0, 1.6296152487, 0.0228811114, 1.5654653706  
O, 0, 4.378714155, 3.4357350418, -1.3379568997  
O, 0, 4.4028630653, 3.1836553775, 1.5955676508  
O, 0, -0.8788396959, -3.3353457138, 1.3547973834  
O, 0, 1.4530997384, -4.2167984461, -0.084572299  
Zn, 0, 0.8984509342, -1.1344079985, 0.0348398905  
Zn, 0, 2.5081304053, 1.2248755849, -0.003945612  
H, 0, 2.1522976627, -0.5459793154, 6.7386437318  
H, 0, 6.6548802251, -2.3873042502, -3.9387084972  
O, 0, 1.4603045083, 0.0678887341, -1.4521390007  
O, 0, -1.2191857382, 1.8253080646, -7.0821291402  
N, 0, -2.0653093871, 2.4483739855, -6.4371702468  
C, 0, -1.9671650846, 2.4237090046, -4.977826292  
O, 0, -2.9892612679, 3.0906276915, -6.9409252778  
C, 0, -0.9314561329, 1.7105813145, -4.3744110611  
C, 0, -2.9150169896, 3.1138647934, -4.219459251  
C, 0, -0.8269830562, 1.677253692, -2.9866666822  
H, 0, -0.2155988708, 1.1876921496, -4.9969061034  
C, 0, -2.8164611069, 3.0840753885, -2.8356257022  
H, 0, -3.7077884484, 3.6569498373, -4.7186398635  
C, 0, -1.777161239, 2.3692211026, -2.2229977169  
H, 0, -0.020327574, 1.1171532405, -2.5148660422  
H, 0, -3.5338837026, 3.6053902152, -2.2108521008  
O, 0, -1.7712930989, 2.4086320146, -0.8499604786  
P, 0, -0.701062963, 1.6398237172, 0.1392740844  
O, 0, -0.8581156723, 0.1440480403, 0.0299073862  
O, 0, 0.6549118086, 2.3120487121, 0.018580888  
O, 0, -1.4111588914, 2.0544372975, 1.5614634331  
C, 0, -1.4321317498, 3.2851945131, 2.1601777036  
C, 0, -1.0358008685, 4.4767630768, 1.5352337582  
C, 0, -1.9128625978, 3.3003322167, 3.4779702592  
C, 0, -1.114872933, 5.6745777828, 2.2376608764  
H, 0, -0.6680774961, 4.4664548781, 0.5178749288  
C, 0, -1.9928882295, 4.4956694109, 4.1777364438  
H, 0, -2.2175096197, 2.3630449543, 3.9308099557  
C, 0, -1.5886184493, 5.675013152, 3.549214109  
H, 0, -0.8170476523, 6.6107131773, 1.7814941087  
H, 0, -2.359516032, 4.5312810711, 5.1960716318  
N, 0, -1.6607595656, 6.9383793495, 4.2835051588  
O, 0, -2.0894031932, 6.9073102836, 5.4386263915  
O, 0, -1.2859490463, 7.96116463, 3.7065527578  
H, 0, 2.0991147176, -0.347166429, -2.049591324

5-TS1

C, 0, -2.5150891741, 0.5042783265, 3.7566239281

H, 0, -2.6346436681, 0.8245518521, 4.7934749786  
C, 0, -2.6852419023, -0.914890919, 3.49683151  
C, 0, -3.0856627176, -1.6966491772, 4.5914846833  
H, 0, -3.2533926061, -1.2008154091, 5.5448820463  
C, 0, -3.2773256352, -3.0728803769, 4.4944664847  
C, 0, -3.0573213297, -3.6873732056, 3.2702372355  
H, 0, -3.2112591545, -4.7593501107, 3.1701938759  
C, 0, -2.6318833085, -2.9629413504, 2.1398732122  
C, 0, -2.4316015367, -1.5417511866, 2.2278693604  
C, 0, -2.4729154259, -3.7280657272, 0.9226498159  
H, 0, -2.8160784567, -4.7640363294, 0.9551556679  
C, 0, -0.986923415, -4.6607750478, -1.9064522533  
H, 0, -1.3301461641, -5.4355106985, -2.5974929389  
H, 0, -0.2467912468, -5.0992271136, -1.221074333  
C, 0, -0.3240978317, -3.5266599454, -2.6890524903  
H, 0, 0.1983912671, -2.8086313891, -2.048368643  
H, 0, 0.4246441453, -3.9702227712, -3.3536142987  
C, 0, -2.6249343829, -1.1122928431, -3.6959535934  
H, 0, -2.6809582785, -1.469449481, -4.726240784  
C, 0, -3.3631079093, 0.0967547402, -3.3844777699  
C, 0, -4.0183645441, 0.7197958773, -4.4589452069  
H, 0, -3.9850576799, 0.2384212891, -5.4339817177  
C, 0, -4.6955501095, 1.9286829855, -4.3170046181  
C, 0, -4.682414894, 2.5561755581, -3.0772163887  
H, 0, -5.1790808513, 3.5164010225, -2.9551324515  
C, 0, -4.0197530192, 1.9958586488, -1.9698559196  
C, 0, -3.4042637395, 0.6984593047, -2.0750137462  
C, 0, -4.0316367491, 2.7793006778, -0.7531370608  
H, 0, -4.7735523843, 3.5788708852, -0.6985721405  
C, 0, -2.70294095, 4.3651208048, 1.8625744034  
H, 0, -3.268840749, 4.9903447476, 2.5586376927  
H, 0, -2.2642700844, 5.0114527315, 1.0874294162  
C, 0, -1.5852310963, 3.6423824504, 2.6200483751  
H, 0, -0.8303804322, 3.1834728018, 1.9718866462  
H, 0, -1.0625353854, 4.3791545176, 3.2393135287  
N, 0, -2.2273015229, 1.4229964435, 2.9005992553  
N, 0, -3.256629066, 2.6683178979, 0.2800551005  
N, 0, -1.8651489692, -1.7825563139, -2.895382517  
N, 0, -1.9926978931, -3.3293118857, -0.2115190754  
O, 0, -2.9534550391, 0.104850537, -1.0235191893  
O, 0, -2.0588349897, -0.8578221066, 1.1929135382  
O, 0, -1.2335196147, -2.8445529752, -3.5580091104  
O, 0, -2.1849827289, -4.327031891, -1.201067141  
O, 0, -2.0896334534, 2.6696762906, 3.53193378  
O, 0, -3.7196079346, 3.5309859498, 1.3093794618  
Zn, 0, -1.7566727001, 1.1697495561, 0.7665071024  
Zn, 0, -1.4910102268, -1.3345170959, -0.8204467633  
H, 0, -3.5939393203, -3.6493045994, 5.3568704392  
H, 0, -5.2043184923, 2.379750311, -5.161985515  
O, 0, -0.5287047949, 1.1550567182, -0.9453000857  
O, 0, 6.1748941319, 5.251228468, 1.3274182168  
N, 0, 6.0726736746, 4.7978945983, 0.1851897493  
C, 0, 4.9876883495, 3.8553367278, -0.0811850153  
O, 0, 6.8228972479, 5.0907389726, -0.74849755  
C, 0, 4.118333922, 3.5035521905, 0.9523385935

C, 0, 4. 8401171509, 3. 3295714923, -1. 3661993761  
C, 0, 3. 076290414, 2. 6180392792, 0. 7046634067  
H, 0, 4. 2673546068, 3. 9292184464, 1. 9371120031  
C, 0, 3. 8023979705, 2. 4423525973, -1. 6143190768  
H, 0, 5. 5351864899, 3. 6184846825, -2. 1447221026  
C, 0, 2. 9171350356, 2. 0850683315, -0. 5849267132  
H, 0, 2. 3948398113, 2. 3306217996, 1. 4957765177  
H, 0, 3. 6572414531, 2. 0132989226, -2. 6001107814  
O, 0, 1. 8888920465, 1. 260416303, -0. 9471158086  
P, 0, 0. 9237858367, 0. 346038012, 0. 096876432  
O, 0, 0. 3047532741, 1. 03806629, 1. 3292993164  
O, 0, 0. 4576700937, -1. 0170256899, -0. 4805197224  
O, 0, 2. 297549538, -0. 254702116, 0. 9633541771  
C, 0, 3. 1950787406, -1. 1639435804, 0. 5402949581  
C, 0, 3. 4017419705, -1. 5320204001, -0. 8054635118  
C, 0, 3. 9946349036, -1. 7523279815, 1. 5423643094  
C, 0, 4. 3715612916, -2. 471662887, -1. 1287239421  
H, 0, 2. 8026294364, -1. 0838498412, -1. 5867341184  
C, 0, 4. 9632768411, -2. 6886691598, 1. 2205745735  
H, 0, 3. 8254900195, -1. 453455497, 2. 57153015  
C, 0, 5. 1438086511, -3. 0487624581, -0. 1186088494  
H, 0, 4. 5448315836, -2. 7651949314, -2. 1571213614  
H, 0, 5. 5790602642, -3. 1497924754, 1. 9830514806  
N, 0, 6. 1488708942, -4. 0431497775, -0. 4653534986  
O, 0, 6. 8235381888, -4. 5282979457, 0. 4477465991  
O, 0, 6. 271970961, -4. 3535464699, -1. 6547929212  
H, 0, -0. 2262676879, 1. 9772954412, -1. 3595043806

5-IMI

C, 0, 2. 4788968434, -1. 2307012958, 3. 6055741371  
H, 0, 2. 5774691555, -1. 7186575745, 4. 5772477652  
C, 0, 2. 6752309267, 0. 2086463332, 3. 5882856047  
C, 0, 3. 0644209863, 0. 7875041183, 4. 8057154254  
H, 0, 3. 2092084108, 0. 1344594084, 5. 663307966  
C, 0, 3. 272359391, 2. 1577693387, 4. 9487446356  
C, 0, 3. 0779662213, 2. 9743958127, 3. 8452636074  
H, 0, 3. 2414484748, 4. 0460543238, 3. 9322086035  
C, 0, 2. 6650611806, 2. 4579955732, 2. 6008436369  
C, 0, 2. 4525902317, 1. 0441646996, 2. 4397447302  
C, 0, 2. 5293192402, 3. 4242107187, 1. 5347114447  
H, 0, 2. 8772400582, 4. 4362215494, 1. 7507496284  
C, 0, 1. 09024359, 4. 8360112122, -1. 1217750871  
H, 0, 1. 44721082, 5. 7194486612, -1. 6579206022  
H, 0, 0. 3341143393, 5. 1483480014, -0. 3869601279  
C, 0, 0. 450370328, 3. 8558147467, -2. 1060472593  
H, 0, -0. 0975893289, 3. 0437878673, -1. 6167233053  
H, 0, -0. 273991102, 4. 41169647, -2. 710486264  
C, 0, 2. 6704586326, 1. 5527748857, -3. 4748972672  
H, 0, 2. 7416278948, 2. 0629836833, -4. 437455146  
C, 0, 3. 343530295, 0. 2716533457, -3. 3681313092  
C, 0, 4. 0010647982, -0. 1758502693, -4. 5260408757  
H, 0, 4. 0069328833, 0. 4728789691, -5. 3991961637  
C, 0, 4. 6344102928, -1. 4138759488, -4. 5908370313  
C, 0, 4. 5820966451, -2. 2444273648, -3. 4786294518  
H, 0, 5. 0550260747, -3. 2233189556, -3. 5157035892

C, 0, 3. 9141785912, -1. 8649980816, -2. 2999936261  
C, 0, 3. 3206511651, -0. 5596799736, -2. 1924439251  
C, 0, 3. 9121660681, -2. 8378784928, -1. 2284114343  
H, 0, 4. 6298640994, -3. 656341707, -1. 315877049  
C, 0, 2. 5596162848, -4. 7676882737, 1. 1305224142  
H, 0, 3. 1069473927, -5. 507158135, 1. 7215099672  
H, 0, 2. 0947051249, -5. 2780747132, 0. 2734990008  
C, 0, 1. 4732310908, -4. 124508547, 1. 9959265022  
H, 0, 0. 7359985602, -3. 5440736135, 1. 4308243956  
H, 0, 0. 9236543233, -4. 925297862, 2. 5024343291  
N, 0, 2. 1858422978, -1. 9923530179, 2. 6091445776  
N, 0, 3. 1572801231, -2. 8676525042, -0. 1762396756  
N, 0, 1. 9596052106, 2. 133355722, -2. 5676833046  
N, 0, 2. 0629338401, 3. 2330127588, 0. 341633926  
O, 0, 2. 835642994, -0. 1536435687, -1. 064464132  
O, 0, 2. 0995568331, 0. 5479027918, 1. 2955533188  
O, 0, 1. 3901524591, 3. 3218871758, -3. 0448063684  
O, 0, 2. 2743455227, 4. 3825529174, -0. 4596697827  
O, 0, 2. 0197970051, -3. 3201524956, 3. 0376940685  
O, 0, 3. 6018230679, -3. 8960227568, 0. 6945055933  
Zn, 0, 1. 7186590723, -1. 3957507459, 0. 5252497274  
Zn, 0, 1. 5635897525, 1. 3888090327, -0. 5887826278  
H, 0, 3. 5797603797, 2. 5741225265, 5. 9018194308  
H, 0, 5. 1453898257, -1. 7272849088, -5. 4946752399  
O, 0, 0. 3992459615, -1. 3027405589, -1. 1830861381  
O, 0, -6. 7127512094, -4. 738957461, 1. 10517774  
N, 0, -6. 6032055117, -4. 203842533, -0. 0004816998  
C, 0, -5. 4019812379, -3. 4125849508, -0. 2605849178  
O, 0, -7. 4386951127, -4. 2959942079, -0. 9026189244  
C, 0, -4. 4335983661, -3. 2924128899, 0. 7377331703  
C, 0, -5. 2458701571, -2. 7972693672, -1. 5038827778  
C, 0, -3. 2838699829, -2. 5513985143, 0. 494329908  
H, 0, -4. 5923707022, -3. 7822115746, 1. 6906040785  
C, 0, -4. 0992099427, -2. 0533774806, -1. 7465599309  
H, 0, -6. 0184645295, -2. 9062195564, -2. 2548390465  
C, 0, -3. 1163204671, -1. 9282144854, -0. 7529519453  
H, 0, -2. 5244362903, -2. 4392207026, 1. 258630424  
H, 0, -3. 9435251893, -1. 5607966296, -2. 7004641189  
O, 0, -1. 9882082738, -1. 2434386227, -1. 1102607983  
P, 0, -0. 8963773504, -0. 4830244958, -0. 0634680184  
O, 0, -0. 3077848066, -1. 2837517758, 1. 1241325867  
O, 0, -0. 3572160902, 0. 903896222, -0. 5172900198  
O, 0, -2. 2090181543, 0. 1638400916, 0. 9010295999  
C, 0, -3. 0179345287, 1. 1858449355, 0. 5845289236  
C, 0, -3. 2283038873, 1. 6785977727, -0. 7221493105  
C, 0, -3. 7221577559, 1. 7759567349, 1. 6568812715  
C, 0, -4. 1008796814, 2. 7365252133, -0. 937161971  
H, 0, -2. 7052924857, 1. 2322600976, -1. 5575320276  
C, 0, -4. 593971592, 2. 8303276864, 1. 4429478959  
H, 0, -3. 5555615447, 1. 3816362839, 2. 6539017832  
C, 0, -4. 775179721, 3. 3123921292, 0. 1422166213  
H, 0, -4. 27380471, 3. 1247844132, -1. 9338172074  
H, 0, -5. 1336634984, 3. 2922499906, 2. 2606899548  
N, 0, -5. 6737580029, 4. 4321541273, -0. 0897780698  
O, 0, -6. 2652367728, 4. 9130476051, 0. 8819812155

O, 0, -5. 7954634513, 4. 8496270387, -1. 2466863606  
H, 0, 0. 0283386772, -2. 137960373, -1. 5089516812

6-RC1

C, 0, -2. 9810380219, -2. 9370582584, -0. 3920135476  
H, 0, -3. 9733227586, -3. 1563139312, -0. 7854646401  
C, 0, -2. 8622994052, -2. 7540104555, 1. 0382064677  
C, 0, -4. 0120891519, -3. 051699962, 1. 7920264433  
H, 0, -4. 9167233174, -3. 3373837288, 1. 2613053651  
C, 0, -4. 0150107951, -2. 9994779987, 3. 1796437729  
C, 0, -2. 8357172655, -2. 6558123572, 3. 8310439034  
H, 0, -2. 8072895084, -2. 6405464717, 4. 9180267956  
C, 0, -1. 667065735, -2. 3155640967, 3. 1284697488  
C, 0, -1. 6624230999, -2. 3227476586, 1. 6945201481  
C, 0, -0. 4921955318, -2. 0484007537, 3. 93514222  
H, 0, -0. 579164826, -2. 2386157914, 5. 006588098  
C, 0, 3. 7140419349, -0. 4263017376, 4. 1093752025  
H, 0, 3. 7348132555, 0. 043093066, 5. 0966224219  
H, 0, 4. 7458136499, -0. 6841616793, 3. 8195140144  
C, 0, 2. 9022196345, -1. 7138813426, 4. 1492259575  
H, 0, 2. 8968557534, -2. 2190314677, 3. 1801124487  
H, 0, 3. 3660965833, -2. 3856294647, 4. 8821501797  
C, 0, 3. 5420169614, 0. 7366196459, 1. 0631469225  
H, 0, 4. 2925717837, 1. 4542989435, 1. 4008325162  
C, 0, 3. 406546129, 0. 5532434316, -0. 368305112  
C, 0, 4. 3468420634, 1. 232146488, -1. 1629290028  
H, 0, 5. 0600269131, 1. 8882341117, -0. 6695388252  
C, 0, 4. 3991882512, 1. 0758349482, -2. 5430722232  
C, 0, 3. 5079700325, 0. 1938356715, -3. 1402862633  
H, 0, 3. 5582580172, 0. 0228324305, -4. 2130255557  
C, 0, 2. 5321040407, -0. 497832046, -2. 3992855729  
C, 0, 2. 4232709139, -0. 2960167642, -0. 9812347352  
C, 0, 1. 7400200118, -1. 4550370211, -3. 1421830185  
H, 0, 2. 0122058275, -1. 6096076132, -4. 187778699  
C, 0, -1. 8648804176, -4. 1523598717, -3. 230199934  
H, 0, -2. 1989912796, -4. 0508031854, -4. 2663426113  
H, 0, -2. 2478150779, -5. 1034685781, -2. 8272776373  
C, 0, -0. 3431787307, -4. 1860639097, -3. 16464793  
H, 0, 0. 0169619825, -4. 343205093, -2. 1446729999  
H, 0, 0. 0103828557, -5. 0196628537, -3. 7830882852  
N, 0, -2. 0047635109, -2. 9043965635, -1. 239559503  
N, 0, 0. 7632827839, -2. 1714191288, -2. 6908400504  
N, 0, 2. 8749871347, 0. 1130486294, 1. 9750725444  
N, 0, 0. 653207173, -1. 6305976455, 3. 5110188722  
O, 0, 1. 48960126, -0. 8853508642, -0. 2814233138  
O, 0, -0. 5918741434, -1. 9650251558, 1. 0280764231  
O, 0, 1. 556488768, -1. 5022084048, 4. 5836368978  
O, 0, 3. 2083451944, 0. 6049347954, 3. 2626171541  
O, 0, 0. 252456775, -3. 001525844, -3. 7048540106  
O, 0, -2. 4829104061, -3. 0489858108, -2. 5704227296  
Zn, 0, -0. 3920245912, -1. 5250319974, -0. 9912477007  
Zn, 0, 0. 7630850171, -0. 3981276267, 1. 7040849495  
H, 0, -4. 9115287942, -3. 2350378132, 3. 7424843758  
H, 0, 5. 1332426943, 1. 6106227007, -3. 1357107202  
O, 0, -0. 2198032984, 1. 1961262946, 1. 9487885226

O, 0, -7. 4801545669, 4. 2355298323, 2. 7567439877  
N, 0, -6. 4147061458, 3. 8609069598, 3. 2512486395  
C, 0, -5. 3811973732, 3. 3519769165, 2. 3469782266  
O, 0, -6. 1636653788, 3. 8850990177, 4. 4579263642  
C, 0, -5. 6428759881, 3. 3070836255, 0. 9767580798  
C, 0, -4. 1627118391, 2. 9234817898, 2. 8777179814  
C, 0, -4. 6632207028, 2. 8221239123, 0. 117905401  
H, 0, -6. 5988933758, 3. 6531544866, 0. 6042022251  
C, 0, -3. 1837682723, 2. 4315011242, 2. 0218084148  
H, 0, -3. 9995980539, 2. 9751576432, 3. 947071399  
C, 0, -3. 4453247354, 2. 3836140768, 0. 648186627  
H, 0, -4. 8338814198, 2. 7847597024, -0. 9519277775  
H, 0, -2. 2214079772, 2. 0715231046, 2. 3830556658  
O, 0, -2. 4200367525, 1. 9417825993, -0. 1672858467  
P, 0, -2. 5935169839, 0. 7597993871, -1. 2879688991  
O, 0, -1. 1706985085, 0. 2315957068, -1. 5016312208  
O, 0, -3. 7140180072, -0. 1753519892, -0. 998946729  
O, 0, -2. 9059458611, 1. 7532590275, -2. 5844958683  
C, 0, -3. 0572368177, 1. 30714617, -3. 8691703881  
C, 0, -3. 4745061201, 0. 0065443166, -4. 1923038128  
C, 0, -2. 8033194961, 2. 2461068134, -4. 8801964463  
C, 0, -3. 6141827815, -0. 3508748023, -5. 5283702384  
H, 0, -3. 6935109428, -0. 7048361223, -3. 4051055623  
C, 0, -2. 9507001319, 1. 8898481276, -6. 2133528819  
H, 0, -2. 4877239657, 3. 2446279931, -4. 5973568056  
C, 0, -3. 3500410431, 0. 5883883545, -6. 5256528687  
H, 0, -3. 9338183021, -1. 346652024, -5. 8096454856  
H, 0, -2. 7567365375, 2. 5950723126, -7. 0119808499  
N, 0, -3. 4913994861, 0. 2007395903, -7. 9280557807  
O, 0, -3. 2593062841, 1. 0534493168, -8. 7877485245  
O, 0, -3. 8312523788, -0. 9591693743, -8. 1741513109  
H, 0, -0. 5272228193, 1. 5694571942, 1. 108864351

6-RC2

C, 0, -2. 0477406264, -3. 5008027461, -1. 6407254399  
H, 0, -2. 7971527422, -3. 8792602762, -2. 3390603701  
C, 0, -2. 4414155456, -3. 3618400417, -0. 2609328079  
C, 0, -3. 7380816487, -3. 8161767959, 0. 0586478974  
H, 0, -4. 3694683815, -4. 1831384251, -0. 7473306702  
C, 0, -4. 2124446266, -3. 8159509951, 1. 3601749746  
C, 0, -3. 3612060843, -3. 3797731979, 2. 3747849351  
H, 0, -3. 700666404, -3. 4095246519, 3. 4075985737  
C, 0, -2. 068650231, -2. 9046858866, 2. 1148646739  
C, 0, -1. 5797492916, -2. 8383256189, 0. 7649589662  
C, 0, -1. 2541328863, -2. 5741154045, 3. 2702714237  
H, 0, -1. 683068296, -2. 7783388531, 4. 2534600208  
C, 0, 2. 5657382629, -0. 7501627081, 4. 8877886245  
H, 0, 2. 2211396856, -0. 3524094624, 5. 8466317218  
H, 0, 3. 644680416, -0. 9621292422, 4. 9631884109  
C, 0, 1. 8551221044, -2. 0547257443, 4. 5597806549  
H, 0, 2. 1910332813, -2. 4608963527, 3. 6036538063  
H, 0, 2. 090077874, -2. 780847877, 5. 3489623044  
C, 0, 3. 3648234306, 0. 5741941224, 2. 0166464881  
H, 0, 3. 9180595298, 1. 3186773082, 2. 5933780538  
C, 0, 3. 738318152, 0. 4111308642, 0. 6228843731

C, 0, 4. 9015052853, 1. 0871831537, 0. 2232382353  
H, 0, 5. 3769517804, 1. 7568465152, 0. 9356760494  
C, 0, 5. 457018163, 0. 9189416442, -1. 0422943027  
C, 0, 4. 8516468957, 0. 0220023498, -1. 9083784732  
H, 0, 5. 2969220338, -0. 1710151842, -2. 8816485235  
C, 0, 3. 6649724229, -0. 6612212479, -1. 5708910822  
C, 0, 3. 0282037693, -0. 4261357254, -0. 3024721981  
C, 0, 3. 2261303988, -1. 6421680387, -2. 5366294748  
H, 0, 3. 8656059859, -1. 7879925756, -3. 4090911567  
C, 0, 0. 0149416343, -4. 4888998962, -3. 912581292  
H, 0, 0. 075872495, -4. 3975271082, -5. 0004318976  
H, 0, -0. 4438847571, -5. 4599623075, -3. 664589336  
C, 0, 1. 4082591833, -4. 4527586229, -3. 2964238579  
H, 0, 1. 3784103068, -4. 6031671955, -2. 2138817698  
H, 0, 1. 9981981447, -5. 2667447068, -3. 7352959862  
N, 0, -0. 8773621842, -3. 2410965688, -2. 1287217187  
N, 0, 2. 1791034287, -2. 3972571797, -2. 464799287  
N, 0, 2. 4653465925, -0. 1198344225, 2. 6236113596  
N, 0, -0. 0617349075, -2. 0857315431, 3. 2289820544  
O, 0, 1. 8734820185, -0. 9624318608, 0. 0019619819  
O, 0, -0. 3996253606, -2. 3457137006, 0. 5099944835  
O, 0, 0. 4326091307, -1. 9067990284, 4. 534234772  
O, 0, 2. 3413548999, 0. 3217213759, 3. 9729177219  
O, 0, 2. 1039442858, -3. 2398081554, -3. 5922523963  
O, 0, -0. 8533117427, -3. 4200453391, -3. 5371735947  
Zn, 0, 0. 4767343121, -1. 8041604433, -1. 3089113541  
Zn, 0, 0. 3680205635, -0. 4972082334, 1. 6138068351  
H, 0, -5. 2131468156, -4. 1661183358, 1. 5887496749  
H, 0, 6. 3564051006, 1. 452670596, -1. 3294108837  
O, 0, -0. 2702234867, 1. 0121170513, 2. 6003670187  
H, 0, 0. 2176872206, 1. 0899181536, 3. 4337539954  
O, 0, 4. 7427283023, 5. 4256082496, -0. 2846577707  
N, 0, 4. 0798660387, 4. 702429272, 0. 4599349939  
C, 0, 2. 834577315, 4. 1383221396, -0. 0577484503  
O, 0, 4. 4123835056, 4. 4016487936, 1. 6117762402  
C, 0, 2. 5862144122, 4. 1973520887, -1. 4302036299  
C, 0, 1. 9516304242, 3. 5116689332, 0. 8217363879  
C, 0, 1. 4496982728, 3. 5721462232, -1. 9281909968  
H, 0, 3. 2875962592, 4. 7029517896, -2. 0822772244  
C, 0, 0. 8024194873, 2. 8975203208, 0. 3312247895  
H, 0, 2. 1629684943, 3. 5013935865, 1. 8840449143  
C, 0, 0. 5807029189, 2. 9120501267, -1. 0512852236  
H, 0, 1. 2274309746, 3. 5720853636, -2. 9898168138  
H, 0, 0. 1372391213, 2. 3855471305, 1. 0300511796  
O, 0, -0. 5388405213, 2. 3280421549, -1. 6197342548  
P, 0, -0. 958612049, 0. 7622748872, -1. 3989405245  
O, 0, -0. 1794362166, -0. 1519431787, -2. 3356355812  
O, 0, -0. 9365029925, 0. 3548914518, 0. 0478319299  
O, 0, -2. 4714811393, 0. 8482082861, -1. 9981134548  
C, 0, -3. 5296275131, 1. 5354683419, -1. 4364755591  
C, 0, -3. 6031270112, 1. 879974686, -0. 0800979607  
C, 0, -4. 5723650959, 1. 8438951969, -2. 3188404586  
C, 0, -4. 7343442482, 2. 5457685267, 0. 3833983249  
H, 0, -2. 7999900597, 1. 6221829333, 0. 601492154  
C, 0, -5. 7013258344, 2. 5029435849, -1. 8520118948

H, 0, -4. 4768315964, 1. 5616469471, -3. 3617774229  
C, 0, -5. 7689129194, 2. 8483640579, -0. 5012556957  
H, 0, -4. 8239466469, 2. 8266292736, 1. 4254975957  
H, 0, -6. 5226306342, 2. 7555717293, -2. 5108782928  
N, 0, -6. 9596548003, 3. 5409362774, -0. 0025538963  
O, 0, -7. 8579109899, 3. 7905639744, -0. 809110621  
O, 0, -6. 996878028, 3. 8323784172, 1. 1936130049

#### 6-TS1

C, 0, -0. 6948451084, -2. 3793279761, 3. 5215340788  
H, 0, -0. 1367262991, -2. 7399346454, 4. 3878457012  
C, 0, -0. 815396723, -3. 2801917023, 2. 4030982438  
C, 0, -0. 2910524265, -4. 5719878623, 2. 6085402762  
H, 0, 0. 1455665789, -4. 801910045, 3. 5777479189  
C, 0, -0. 318567046, -5. 5452920557, 1. 6218295442  
C, 0, -0. 8632846281, -5. 2104187333, 0. 3858936884  
H, 0, -0. 8863446216, -5. 9540141284, -0. 4074643376  
C, 0, -1. 3698240202, -3. 930564119, 0. 1133748921  
C, 0, -1. 3872528371, -2. 9163281732, 1. 1323942853  
C, 0, -1. 8904269238, -3. 7337031664, -1. 219415031  
H, 0, -1. 9812334201, -4. 6235823553, -1. 8450231969  
C, 0, -3. 8983777272, -1. 0983301655, -4. 2775373684  
H, 0, -3. 5298942098, -1. 4249401024, -5. 2540606517  
H, 0, -4. 9103227144, -0. 6796513324, -4. 404780451  
C, 0, -3. 9809053772, -2. 2707039031, -3. 3136150894  
H, 0, -4. 4134875794, -1. 9708575038, -2. 3560736602  
H, 0, -4. 6208812098, -3. 0461103751, -3. 7539669498  
C, 0, -3. 4805594291, 1. 5369617589, -2. 4618623465  
H, 0, -3. 6872293076, 2. 0398403815, -3. 4090817942  
C, 0, -3. 6022900472, 2. 3508160642, -1. 2679252119  
C, 0, -4. 0727093112, 3. 6572893954, -1. 4847183045  
H, 0, -4. 3012010626, 3. 9569953486, -2. 5048290766  
C, 0, -4. 2552836605, 4. 5692094359, -0. 4504166678  
C, 0, -3. 9552270905, 4. 1616863794, 0. 8407005715  
H, 0, -4. 0949273128, 4. 8516609577, 1. 6697295643  
C, 0, -3. 46275278, 2. 8724981047, 1. 1202233393  
C, 0, -3. 2662304911, 1. 912326636, 0. 0635203431  
C, 0, -3. 2285994894, 2. 5867832713, 2. 5140995774  
H, 0, -3. 5121982629, 3. 3620883402, 3. 2280145524  
C, 0, -1. 7909343252, -0. 2820872964, 5. 6941814634  
H, 0, -1. 3344511096, 0. 353675876, 6. 4578009792  
H, 0, -2. 1269983884, -1. 2182839127, 6. 1689127304  
C, 0, -3. 0004576906, 0. 4058235497, 5. 0773159363  
H, 0, -3. 5182132049, -0. 2457458553, 4. 3684222713  
H, 0, -3. 704032577, 0. 6650922585, 5. 8780345235  
N, 0, -1. 1703606205, -1. 1787788786, 3. 6023766044  
N, 0, -2. 7272117544, 1. 5067541249, 3. 0209933583  
N, 0, -3. 1370704518, 0. 2962272874, -2. 5299824596  
N, 0, -2. 2627380719, -2. 6212855154, -1. 7590921845  
O, 0, -2. 8228254903, 0. 7159611922, 0. 3055366876  
O, 0, -1. 9134754443, -1. 7499491176, 0. 9035198299  
O, 0, -2. 6940865914, -2. 8588457188, -3. 0889944019  
O, 0, -2. 9813318795, -0. 0774138605, -3. 8969012439  
O, 0, -2. 6421327902, 1. 629673342, 4. 4264972268  
O, 0, -0. 7191695649, -0. 5370114107, 4. 7893477276

Zn, 0, -1. 6055354115, 0. 0514431517, 1. 9028169555  
Zn, 0, -1. 6120732039, -0. 6377791708, -1. 1253223511  
H, 0, 0. 0838110836, -6. 5357488859, 1. 8031507362  
H, 0, -4. 6212439387, 5. 5703714979, -0. 6493874875  
O, 0, -0. 3767485807, 0. 8715244779, -1. 3717777854  
H, 0, -0. 7232763605, 1. 7420997239, -1. 1272395658  
O, 0, 1. 6470191835, 6. 8407881825, -1. 8186897902  
N, 0, 2. 1307585477, 5. 952350147, -2. 525307729  
C, 0, 2. 1222920965, 4. 5860513721, -2. 0067382072  
O, 0, 2. 6172049588, 6. 1431284625, -3. 6421204299  
C, 0, 1. 5962501928, 4. 3428809859, -0. 7360719513  
C, 0, 2. 6396386519, 3. 5540865517, -2. 7928072791  
C, 0, 1. 5801576529, 3. 0442713294, -0. 2430903674  
H, 0, 1. 2171266539, 5. 1720258569, -0. 1513799468  
C, 0, 2. 6170542836, 2. 2558296766, -2. 3009671191  
H, 0, 3. 0426288706, 3. 7808971377, -3. 7720137507  
C, 0, 2. 0787636901, 1. 9993776786, -1. 0347475816  
H, 0, 1. 18642075, 2. 8216031627, 0. 7415764081  
H, 0, 3. 0010979235, 1. 4269801867, -2. 8849476617  
O, 0, 2. 1704076989, 0. 7193839864, -0. 5641499447  
P, 0, 1. 009116459, -0. 177238587, 0. 1805140074  
O, 0, 0. 2209014546, 0. 5795506099, 1. 2652238027  
O, 0, 0. 421531022, -1. 3468277839, -0. 5934033367  
O, 0, 2. 1372228673, -0. 9266179439, 1. 1976890553  
C, 0, 3. 1113030031, -1. 7979910497, 0. 8432884282  
C, 0, 3. 3210753447, -2. 2856926755, -0. 4598566342  
C, 0, 3. 9537797141, -2. 2216652264, 1. 8889126086  
C, 0, 4. 351853181, -3. 1851522949, -0. 7006511117  
H, 0, 2. 6693904827, -1. 9754013354, -1. 2656061037  
C, 0, 4. 9808659908, -3. 1203204826, 1. 6487220121  
H, 0, 3. 7805224968, -1. 8225705164, 2. 8829887745  
C, 0, 5. 1727084599, -3. 5994794343, 0. 3498955274  
H, 0, 4. 5292682779, -3. 575311443, -1. 6954814742  
H, 0, 5. 6373627261, -3. 4549820674, 2. 4424735601  
N, 0, 6. 2454778878, -4. 5515718739, 0. 0900472969  
O, 0, 6. 9465211222, -4. 9067993614, 1. 0422887632  
O, 0, 6. 3948039504, -4. 9552899294, -1. 066686355

6-IMI

C, 0, -2. 0417796629, -2. 9772654308, -2. 0337583449  
H, 0, -2. 7968424688, -3. 1264221687, -2. 8080394988  
C, 0, -2. 4997010048, -2. 9628702768, -0. 6669441907  
C, 0, -3. 8699602271, -3. 2370903373, -0. 4846522414  
H, 0, -4. 4784542795, -3. 4288765113, -1. 3652568094  
C, 0, -4. 4532859943, -3. 2708810448, 0. 7723092241  
C, 0, -3. 649037273, -3. 0091654245, 1. 8772956879  
H, 0, -4. 0871728163, -3. 0268856159, 2. 8725014713  
C, 0, -2. 2850865747, -2. 7007701662, 1. 7553388226  
C, 0, -1. 6554177525, -2. 6786922666, 0. 4637561979  
C, 0, -1. 5871599689, -2. 4509183746, 2. 9968051112  
H, 0, -2. 1418402048, -2. 6514020283, 3. 9153565775  
C, 0, 2. 1178533729, -1. 0378214288, 5. 1529981955  
H, 0, 1. 7266202995, -0. 5242776442, 6. 0352842757  
H, 0, 3. 1391454322, -1. 3899004686, 5. 3720767407  
C, 0, 1. 2576668186, -2. 2444157005, 4. 8061152355

H, 0, 1. 667715088, -2. 8013060885, 3. 9596288168  
H, 0, 1. 2319877417, -2. 9128887312, 5. 6759897052  
C, 0, 3. 552400944, -0. 229979556, 2. 4287933123  
H, 0, 4. 1999598634, 0. 3069386241, 3. 1251190648  
C, 0, 4. 0985964121, -0. 502542327, 1. 1162449087  
C, 0, 5. 4232963214, -0. 0723317447, 0. 9157642097  
H, 0, 5. 9292042119, 0. 4330396572, 1. 7350571691  
C, 0, 6. 0961868152, -0. 2711496212, -0. 2831195123  
C, 0, 5. 4253494858, -0. 9182654869, -1. 312896064  
H, 0, 5. 9330225701, -1. 0897270654, -2. 2592851358  
C, 0, 4. 0959791572, -1. 3580345871, -1. 1792266838  
C, 0, 3. 3819265822, -1. 1676964081, 0. 0572245792  
C, 0, 3. 5433501181, -2. 0337376124, -2. 3314765558  
H, 0, 4. 2244658433, -2. 2166213708, -3. 1644860033  
C, 0, -0. 0347222344, -3. 8794045251, -4. 3930212066  
H, 0, 0. 1029938826, -3. 6123309237, -5. 4443245732  
H, 0, -0. 6444251851, -4. 7959266666, -4. 3383393865  
C, 0, 1. 307268984, -4. 1630626697, -3. 7320407337  
H, 0, 1. 1870971286, -4. 496621614, -2. 6981302146  
H, 0, 1. 8100580637, -4. 961434129, -4. 2913380429  
N, 0, -0. 8212578959, -2. 8298632554, -2. 4378209023  
N, 0, 2. 3293964132, -2. 4501517154, -2. 4891717974  
N, 0, 2. 3792183484, -0. 5489802219, 2. 8602570741  
N, 0, -0. 3808847123, -2. 0131911092, 3. 1437534524  
O, 0, 2. 1614240722, -1. 5901543198, 0. 2023711671  
O, 0, -0. 3805077074, -2. 4389905741, 0. 3473653363  
O, 0, -0. 0926093999, -1. 8735959167, 4. 5229957129  
O, 0, 2. 1525820608, -0. 0131766769, 4. 1576922972  
O, 0, 2. 1784182609, -3. 0256709699, -3. 7680939055  
O, 0, -0. 7533744138, -2. 7705600614, -3. 8566405371  
Zn, 0, 0. 6468381694, -1. 7583027304, -1. 3309927155  
Zn, 0, 0. 6353313728, -0. 7978858662, 1. 6051743142  
H, 0, -5. 509245789, -3. 4862546981, 0. 8917311335  
H, 0, 7. 1172679907, 0. 0703255621, -0. 41160204  
O, 0, 1. 110140193, 1. 0793854879, 0. 5885700771  
H, 0, 1. 8405260457, 1. 1425050226, -0. 0463251747  
O, 0, 4. 430161005, 6. 0054393138, -2. 049847345  
N, 0, 3. 5931394048, 6. 2422923763, -1. 174699129  
C, 0, 2. 5100975308, 5. 2794685673, -0. 986776943  
O, 0, 3. 6148780161, 7. 2362026323, -0. 4454095332  
C, 0, 2. 4485152463, 4. 1537495377, -1. 8109067746  
C, 0, 1. 5603617801, 5. 5056813496, 0. 0124641339  
C, 0, 1. 4258364452, 3. 2319640895, -1. 6264449844  
H, 0, 3. 1927972607, 4. 0230977101, -2. 5869088402  
C, 0, 0. 5433061356, 4. 5792557043, 0. 199967703  
H, 0, 1. 6368135423, 6. 3937483833, 0. 627631676  
C, 0, 0. 4784463268, 3. 4359741568, -0. 6087442514  
H, 0, 1. 3352833871, 2. 3596513262, -2. 2654218767  
H, 0, -0. 2084908061, 4. 7183545904, 0. 9691306865  
O, 0, -0. 5767832137, 2. 595946, -0. 4375213821  
P, 0, -0. 517346847, 0. 9252434942, -0. 3085777802  
O, 0, 0. 1605621791, 0. 1584545817, -1. 4932626082  
O, 0, -1. 025033822, 0. 234820832, 0. 9883038419  
O, 0, -2. 0752585148, 0. 9044924044, -1. 1218711184  
C, 0, -3. 2529437929, 1. 338727586, -0. 659111389

C, 0, -3. 4695382043, 1. 9320762425, 0. 6045111071  
C, 0, -4. 3537080796, 1. 1803183775, -1. 5326540992  
C, 0, -4. 74351498, 2. 3365552582, 0. 9753648319  
H, 0, -2. 6424386422, 2. 0525090665, 1. 2903469154  
C, 0, -5. 6247189996, 1. 5836615292, -1. 1627641915  
H, 0, -4. 1700073196, 0. 736921124, -2. 5062194728  
C, 0, -5. 817132631, 2. 1604950401, 0. 0975317195  
H, 0, -4. 9245141945, 2. 7886406036, 1. 9432045554  
H, 0, -6. 4720912416, 1. 4650894353, -1. 827133532  
N, 0, -7. 1492796184, 2. 574957815, 0. 4993771804  
O, 0, -8. 0790748313, 2. 3972246235, -0. 2963867159  
O, 0, -7. 2905550196, 3. 0813090256, 1. 6182780155

#### 6-TS2

C, 0, -2. 2608823798, -2. 6918859179, -2. 122909001  
H, 0, -2. 9745769511, -2. 7417567228, -2. 947452246  
C, 0, -2. 8038169136, -2. 5807316745, -0. 7909318998  
C, 0, -4. 2091258497, -2. 6212965373, -0. 7015979784  
H, 0, -4. 7820784383, -2. 7114010074, -1. 6213404005  
C, 0, -4. 8721335067, -2. 5537166097, 0. 5145569349  
C, 0, -4. 1119010403, -2. 4374280452, 1. 6730293586  
H, 0, -4. 6117639923, -2. 3861310331, 2. 6373162908  
C, 0, -2. 7090472648, -2. 3655166131, 1. 6447028413  
C, 0, -2. 0041077377, -2. 433194102, 0. 3950172907  
C, 0, -2. 0626143652, -2. 2580226502, 2. 9347602295  
H, 0, -2. 7041694471, -2. 3637536571, 3. 8114898786  
C, 0, 1. 6530913281, -1. 2711484855, 5. 2842590929  
H, 0, 1. 2479076789, -0. 7306643993, 6. 1437225351  
H, 0, 2. 6336799772, -1. 6916142904, 5. 5602767504  
C, 0, 0. 7347233595, -2. 4214886169, 4. 892720249  
H, 0, 1. 1459138963, -3. 0043311727, 4. 0642392079  
H, 0, 0. 6311371046, -3. 0862825907, 5. 7590943662  
C, 0, 3. 2978080334, -0. 5152879998, 2. 6354700941  
H, 0, 3. 9288680561, 0. 0150351845, 3. 3513329977  
C, 0, 3. 8889670567, -0. 8416411921, 1. 3570027581  
C, 0, 5. 2428699212, -0. 4888791541, 1. 2091715138  
H, 0, 5. 7378263927, 0. 0117129585, 2. 0379296064  
C, 0, 5. 9570168471, -0. 7610449837, 0. 0493461508  
C, 0, 5. 2990762994, -1. 4030634419, -0. 9923622627  
H, 0, 5. 8405082106, -1. 6341659131, -1. 9067385405  
C, 0, 3. 9412971213, -1. 7615521563, -0. 9117414134  
C, 0, 3. 1855355667, -1. 4901661484, 0. 2818417215  
C, 0, 3. 4049192865, -2. 4436842351, -2. 0702571272  
H, 0, 4. 1162707654, -2. 709586188, -2. 8542873145  
C, 0, -0. 2241107477, -3. 9491527769, -4. 301393555  
H, 0, 0. 0238670326, -3. 736475213, -5. 3447797705  
H, 0, -0. 9538140648, -4. 7744852069, -4. 2726682083  
C, 0, 1. 016872771, -4. 3898825974, -3. 5358503416  
H, 0, 0. 7814700327, -4. 6644787818, -2. 504451828  
H, 0, 1. 4366697601, -5. 271132622, -4. 0356235984  
N, 0, -1. 0070494826, -2. 7441468407, -2. 4379638145  
N, 0, 2. 1734211169, -2. 7740791222, -2. 2820256287  
N, 0, 2. 0989992939, -0. 800542662, 3. 0191919284  
N, 0, -0. 8087379748, -2. 0479277264, 3. 1658567831  
O, 0, 1. 9347071035, -1. 8424034563, 0. 3762734663

O, 0, -0. 6997043578, -2. 3911107958, 0. 3585974688  
O, 0, -0. 5805852887, -1. 9767561212, 4. 5570811228  
O, 0, 1. 8165464852, -0. 2503718129, 4. 2964724585  
O, 0, 2. 0445717835, -3. 3916065729, -3. 5415390593  
O, 0, -0. 8266758865, -2. 7382578044, -3. 8470941673  
Zn, 0, 0. 5146415623, -1. 842012213, -1. 2644703473  
Zn, 0, 0. 4540910334, -1. 0376766512, 1. 7021240251  
H, 0, -5. 9548840416, -2. 5847395226, 0. 5613882137  
H, 0, 7. 0008557662, -0. 4815051829, -0. 0402041107  
O, 0, 1. 4557418884, 1. 1300266593, 0. 4470722214  
H, 0, 2. 1356796202, 1. 1874440495, -0. 2422402157  
O, 0, 4. 8510523242, 5. 8311196308, -2. 5384204696  
N, 0, 4. 0611178432, 6. 1348441764, -1. 6403924302  
C, 0, 2. 9564829787, 5. 2194172164, -1. 3636824977  
O, 0, 4. 1473760909, 7. 1585550266, -0. 958474821  
C, 0, 2. 824699756, 4. 0595253209, -2. 130279318  
C, 0, 2. 0565026986, 5. 5237289721, -0. 3393096563  
C, 0, 1. 7815213422, 3. 1831708189, -1. 8602579084  
H, 0, 3. 5311458202, 3. 868194132, -2. 9287323634  
C, 0, 1. 0190601375, 4. 6420443192, -0. 0665861656  
H, 0, 2. 1869564976, 6. 4363874788, 0. 2290212369  
C, 0, 0. 8835828985, 3. 4642902933, -0. 8155074215  
H, 0, 1. 6350562002, 2. 2874329578, -2. 455684928  
H, 0, 0. 3050335865, 4. 8424842469, 0. 7247460938  
O, 0, -0. 1857051155, 2. 664257389, -0. 5669632818  
P, 0, -0. 1320094132, 0. 9988993125, -0. 3057099507  
O, 0, 0. 3846893792, 0. 1075702409, -1. 4924529211  
O, 0, -0. 695183351, 0. 4116027887, 1. 0317181688  
O, 0, -1. 7706109307, 1. 0059008717, -1. 0639404112  
C, 0, -2. 8985026306, 1. 525125593, -0. 5894140522  
C, 0, -3. 0350324343, 2. 2234925758, 0. 6349056761  
C, 0, -4. 0514468704, 1. 3551435023, -1. 3968501489  
C, 0, -4. 2719898327, 2. 7075989361, 1. 0313204947  
H, 0, -2. 1711988326, 2. 3627604851, 1. 2701128801  
C, 0, -5. 2853276893, 1. 8378787479, -1. 0011544821  
H, 0, -3. 9328520436, 0. 8374817517, -2. 3437125873  
C, 0, -5. 3957718807, 2. 512188562, 0. 2210410844  
H, 0, -4. 3876778094, 3. 2383238751, 1. 9689232006  
H, 0, -6. 1677676025, 1. 7086985264, -1. 6163010747  
N, 0, -6. 6880815765, 3. 0049237093, 0. 6523868574  
O, 0, -7. 6643580361, 2. 8036528013, -0. 0815614348  
O, 0, -6. 7571428052, 3. 5981600094, 1. 7358754643

#### 6-IM2

C, 0, -2. 5432682284, -1. 3234263769, -2. 8827442809  
H, 0, -3. 0175106084, -1. 015372149, -3. 8164929317  
C, 0, -3. 3001280253, -1. 1326175765, -1. 6687270677  
C, 0, -4. 6057478168, -0. 6338161116, -1. 8378685955  
H, 0, -4. 9457486131, -0. 4103355589, -2. 8461184863  
C, 0, -5. 4604049066, -0. 4249388493, -0. 7649902464  
C, 0, -4. 9975213385, -0. 7192881062, 0. 511377411  
H, 0, -5. 6524007185, -0. 567190504, 1. 3658675631  
C, 0, -3. 6958265328, -1. 1981093144, 0. 7450521304  
C, 0, -2. 7960859067, -1. 4144060364, -0. 3531729541  
C, 0, -3. 3750425717, -1. 4824428633, 2. 1267289885

H, 0, -4. 190797195, -1. 3920636503, 2. 8460146161  
C, 0, -0. 2041799068, -2. 3692770872, 5. 2103131305  
H, 0, -0. 5466354567, -1. 792103133, 6. 073208445  
H, 0, 0. 4407485424, -3. 1889949081, 5. 5659578808  
C, 0, -1. 3886788118, -2. 9826662296, 4. 4743193748  
H, 0, -1. 0679148189, -3. 6102196533, 3. 6385023437  
H, 0, -1. 9404830685, -3. 6142888304, 5. 1810459289  
C, 0, 2. 1873650745, -2. 0576184953, 3. 0541986509  
H, 0, 2. 7921121623, -1. 8596887032, 3. 9411561937  
C, 0, 2. 889772212, -2. 4582613783, 1. 855989071  
C, 0, 4. 2759650324, -2. 6456822802, 1. 9989451584  
H, 0, 4. 7232861177, -2. 4603776519, 2. 9725413301  
C, 0, 5. 0791266254, -3. 0595597226, 0. 9434897391  
C, 0, 4. 4794546888, -3. 291561323, -0. 2878438172  
H, 0, 5. 0866097289, -3. 627600042, -1. 1251759823  
C, 0, 3. 1019099489, -3. 0972819087, -0. 4976463823  
C, 0, 2. 2570467876, -2. 6656470505, 0. 5817746528  
C, 0, 2. 6213577853, -3. 4053958846, -1. 8278260742  
H, 0, 3. 3387450304, -3. 8593879456, -2. 5139633054  
C, 0, -0. 703784202, -3. 0848290046, -4. 8606480246  
H, 0, -0. 1613491124, -2. 9006086623, -5. 7918275851  
H, 0, -1. 6837919703, -3. 5263122849, -5. 1038999122  
C, 0, 0. 0560582626, -4. 0736836116, -3. 9857462866  
H, 0, -0. 4946250096, -4. 3163727296, -3. 0731277395  
H, 0, 0. 1954539693, -5. 0002944072, -4. 5555283224  
N, 0, -1. 3593117043, -1. 8351487845, -2. 9760192746  
N, 0, 1. 4335386928, -3. 2029605348, -2. 2952962339  
N, 0, 0. 908765383, -1. 9262872068, 3. 1820062725  
N, 0, -2. 2277639079, -1. 8362094295, 2. 6062025947  
O, 0, 0. 974892335, -2. 5023560432, 0. 4035310559  
O, 0, -1. 5888808131, -1. 8747728929, -0. 1539253546  
O, 0, -2. 3102731731, -1. 9952242008, 4. 0045936143  
O, 0, 0. 5653241507, -1. 4247658819, 4. 464335881  
O, 0, 1. 3654001911, -3. 6073136106, -3. 6431675169  
O, 0, -0. 8728417662, -1. 7786709171, -4. 309427445  
Zn, 0, 0. 0904225486, -1. 7423633833, -1. 4338329831  
Zn, 0, -0. 3880927826, -1. 3876179707, 1. 5884855425  
H, 0, -6. 4605865414, -0. 0353305862, -0. 9170805105  
H, 0, 6. 145702275, -3. 2013476413, 1. 0782817721  
O, 0, 2. 0541589348, 0. 5938986707, 0. 7564980495  
H, 0, 2. 7684103643, 0. 4765280214, 0. 1112800869  
O, 0, 6. 8334553214, 4. 5514213211, -1. 2520405046  
N, 0, 6. 0374476603, 4. 9446125994, -0. 3951678852  
C, 0, 4. 7196588046, 4. 3149753686, -0. 3463794061  
O, 0, 6. 2842421287, 5. 831789528, 0. 4248915116  
C, 0, 4. 4074877154, 3. 3163573647, -1. 2716549782  
C, 0, 3. 8013284993, 4. 7263989696, 0. 6225856044  
C, 0, 3. 1577061449, 2. 7129124753, -1. 2200232424  
H, 0, 5. 1403107629, 3. 0376546913, -2. 018928614  
C, 0, 2. 5551952007, 4. 1158036006, 0. 6755167398  
H, 0, 4. 0779610567, 5. 5079866816, 1. 3193809355  
C, 0, 2. 232358876, 3. 1012274722, -0. 2362176877  
H, 0, 2. 8734070857, 1. 9541842585, -1. 9427617989  
H, 0, 1. 8184875174, 4. 4053429056, 1. 4168395136  
O, 0, 0. 9759344899, 2. 5826068876, -0. 2074442609

P, 0, 0. 5950166102, 0. 9459775968, -0. 0869714547  
O, 0, 0. 9267151348, 0. 0210720088, -1. 3152385182  
O, 0, -0. 2846730889, 0. 5033240719, 1. 1276309206  
O, 0, -0. 9274647981, 1. 4760902413, -1. 0230750081  
C, 0, -1. 8741795876, 2. 3201868285, -0. 6436157934  
C, 0, -1. 9993370723, 2. 8969780878, 0. 6474887181  
C, 0, -2. 8489111336, 2. 6618668724, -1. 619445233  
C, 0, -3. 0581828208, 3. 7406050845, 0. 9422521766  
H, 0, -1. 2711751711, 2. 6551472027, 1. 4093347417  
C, 0, -3. 9052249197, 3. 5032152272, -1. 3245663092  
H, 0, -2. 7316243734, 2. 2456268786, -2. 6153738507  
C, 0, -4. 015094785, 4. 0392754284, -0. 0350534935  
H, 0, -3. 1638175351, 4. 1765400613, 1. 9288057315  
H, 0, -4. 6479369247, 3. 7627969956, -2. 0696560872  
N, 0, -5. 1305419382, 4. 9012819264, 0. 289320259  
O, 0, -5. 9694864242, 5. 1299334188, -0. 5929055014  
O, 0, -5. 2006437726, 5. 3647493609, 1. 43498761

### 6-TS3

C, 0, -2. 25054723, -2. 3718393918, -2. 1491231114  
H, 0, -2. 9373411188, -2. 3574908274, -2. 9974792596  
C, 0, -2. 8364352603, -2. 3168608806, -0. 8318106852  
C, 0, -4. 2435125807, -2. 3197563623, -0. 793109415  
H, 0, -4. 7849306145, -2. 3484814126, -1. 7353716172  
C, 0, -4. 9500223113, -2. 2861578919, 0. 4007759931  
C, 0, -4. 2311188637, -2. 243893896, 1. 5880810612  
H, 0, -4. 7634678292, -2. 2199140504, 2. 5357220074  
C, 0, -2. 8245947849, -2. 2171768453, 1. 6120546613  
C, 0, -2. 0783790684, -2. 2455312558, 0. 385740835  
C, 0, -2. 2258112897, -2. 2035338043, 2. 927966729  
H, 0, -2. 9069192569, -2. 2984030831, 3. 7752945663  
C, 0, 1. 4842910774, -1. 6841568734, 5. 4502607986  
H, 0, 1. 1131636349, -1. 1373714061, 6. 3210924821  
H, 0, 2. 3991184423, -2. 2273812312, 5. 737016312  
C, 0, 0. 454040908, -2. 7035641817, 4. 981265371  
H, 0, 0. 8262440251, -3. 3048601679, 4. 1474116172  
H, 0, 0. 2360654598, -3. 3800664444, 5. 8165592689  
C, 0, 3. 2972924987, -0. 903529296, 2. 8764884347  
H, 0, 3. 9293533354, -0. 4177319518, 3. 6220712611  
C, 0, 3. 9000457778, -1. 1988902994, 1. 5962943101  
C, 0, 5. 2751912369, -0. 9215707591, 1. 4948052144  
H, 0, 5. 7794761044, -0. 4925283866, 2. 3573428919  
C, 0, 5. 9983495398, -1. 1821195205, 0. 3378881414  
C, 0, 5. 3276293265, -1. 7318308948, -0. 747752767  
H, 0, 5. 8756273008, -1. 953166757, -1. 6606290061  
C, 0, 3. 9484233034, -2. 0054279014, -0. 7145411862  
C, 0, 3. 1846227113, -1. 7423384974, 0. 473896885  
C, 0, 3. 3975398064, -2. 5934220042, -1. 9172163466  
H, 0, 4. 11108135, -2. 8760847299, -2. 6934980759  
C, 0, -0. 2674182526, -3. 6293780055, -4. 3307313248  
H, 0, 0. 0409433736, -3. 3870044315, -5. 3512155072  
H, 0, -1. 08242144, -4. 3699209932, -4. 3743081742  
C, 0, 0. 8893332481, -4. 2439882393, -3. 5528701333  
H, 0, 0. 5871667597, -4. 5476859625, -2. 5471100677  
H, 0, 1. 2286337302, -5. 1375398988, -4. 0905818636



N, 0, -0.9901127719, -2.4486756954, -2.4258456875  
N, 0, 2.1519237587, -2.819380183, -2.1769798996  
N, 0, 2.0839059013, -1.1710639127, 3.2302810263  
N, 0, -0.969935081, -2.0958034106, 3.2164552799  
O, 0, 1.9091104005, -2.0139863061, 0.5232944709  
O, 0, -0.7708977174, -2.237918511, 0.393029053  
O, 0, -0.7876082327, -2.0944857846, 4.6146680559  
O, 0, 1.7966393054, -0.6485240598, 4.5179451767  
O, 0, 2.0182942447, -3.3687898005, -3.4680426823  
O, 0, -0.7559763858, -2.385920045, -3.8256354515  
Zn, 0, 0.5557744991, -1.7379907454, -1.1805675822  
Zn, 0, 0.4562027173, -1.2509674588, 1.8605877162  
H, 0, -6.0340615095, -2.2829419049, 0.4065104795  
H, 0, 7.0593557894, -0.9647249852, 0.2841515171  
O, 0, 2.0271465434, 1.5412717591, 0.4040231871  
H, 0, 2.6290190784, 1.4834043751, -0.352696569  
O, 0, 3.977787653, 6.4949050316, -3.4907773527  
N, 0, 3.2696538121, 6.7528774436, -2.5137618349  
C, 0, 2.4418689054, 5.6801440595, -1.9675948343  
O, 0, 3.2183697018, 7.8570587999, -1.9671857409  
C, 0, 2.4689387976, 4.422602983, -2.5741082276  
C, 0, 1.639719809, 5.9352321994, -0.8527193815  
C, 0, 1.6872973694, 3.3998331923, -2.0527964232  
H, 0, 3.0915855399, 4.2683886588, -3.4468197394  
C, 0, 0.8637327022, 4.9098436657, -0.3295910596  
H, 0, 1.6409812503, 6.9241207697, -0.4111432788  
C, 0, 0.890812454, 3.638885581, -0.9206416598  
H, 0, 1.6677754563, 2.4212833385, -2.5218787252  
H, 0, 0.2317414246, 5.0684066149, 0.537270913  
O, 0, 0.0546246377, 2.6940887146, -0.4138051725  
P, 0, 0.4662227973, 1.1027425962, -0.1070636441  
O, 0, 0.9844752939, 0.1738020427, -1.2614411796  
O, 0, 0.049957879, 0.5768094127, 1.2963345631  
O, 0, -1.3569756529, 0.7508807324, -0.8363668223  
C, 0, -2.4941887324, 1.2783691892, -0.4254011595  
C, 0, -2.7026018939, 1.8757389439, 0.8485423921  
C, 0, -3.6034080263, 1.2254219376, -1.3160939821  
C, 0, -3.9516606948, 2.3504363034, 1.212015328  
H, 0, -1.8725273997, 1.9376046722, 1.5402406174  
C, 0, -4.8497414306, 1.6995871451, -0.9526207027  
H, 0, -3.4357949921, 0.807600663, -2.3045554903  
C, 0, -5.0287036456, 2.2555111721, 0.3210947718  
H, 0, -4.1170461003, 2.7957195547, 2.186266004  
H, 0, -5.6924587795, 1.6582142936, -1.6327144858  
N, 0, -6.335976676, 2.7261469794, 0.718841813  
O, 0, -7.2707325481, 2.610421337, -0.0864274469  
O, 0, -6.4658313804, 3.2153110761, 1.8491211102

6-PC

C, 0, 0.7754922413, 2.8719455534, 2.2055534763  
H, 0, 0.3391518708, 3.680201711, 2.7925218644  
C, 0, 1.2966168952, 3.2314728698, 0.9000908353  
C, 0, 1.2660591959, 4.6057578447, 0.6125489516  
H, 0, 0.8045881071, 5.270047566, 1.3383991308  
C, 0, 1.8028783211, 5.1361251084, -0.5559647057

C, 0, 2.4353610305, 4.2690207302, -1.4297542429  
H, 0, 2.9181460952, 4.6597381309, -2.3221893624  
C, 0, 2.4902377179, 2.8776498792, -1.1969552815  
C, 0, 1.8397589212, 2.3025422654, -0.0505255343  
C, 0, 3.3275825429, 2.1524856312, -2.1190008384  
H, 0, 3.8217482806, 2.7405374549, -2.8938802389  
C, 0, 5.2810244584, -1.7143334597, -3.446094033  
H, 0, 5.4160949666, -1.5920603632, -4.5242528687  
H, 0, 6.0316622041, -2.4307856665, -3.0751803842  
C, 0, 5.4813937172, -0.3875780839, -2.7280388376  
H, 0, 5.4361867733, -0.5048196594, -1.6422139698  
H, 0, 6.4709331911, 0.0101634841, -2.9858473155  
C, 0, 3.2437010707, -3.5017527107, -1.635187577  
H, 0, 3.4838240381, -4.2869863306, -2.3549241926  
C, 0, 2.6297972082, -3.9125891966, -0.3958518436  
C, 0, 2.4637119618, -5.2986366615, -0.2139113875  
H, 0, 2.8074845383, -5.9667916878, -1.0005970884  
C, 0, 1.885077109, -5.8281640346, 0.9320662346  
C, 0, 1.4492195643, -4.9471322268, 1.9188985896  
H, 0, 0.998332038, -5.3411611436, 2.8272096871  
C, 0, 1.5547796431, -3.5553131164, 1.7754252349  
C, 0, 2.1804325695, -2.9821759908, 0.6110815568  
C, 0, 1.0891074137, -2.75784947, 2.8877430212  
H, 0, 0.9142826535, -3.2852547333, 3.8278446588  
C, 0, 0.7962265184, 1.1824174371, 5.0505855029  
H, 0, 0.0420681409, 1.0751799981, 5.835414046  
H, 0, 1.5760365624, 1.8758335503, 5.4057125857  
C, 0, 1.4487853652, -0.1524703116, 4.7398563569  
H, 0, 2.2585349092, -0.0322375245, 4.0169486243  
H, 0, 1.8692286042, -0.5728802352, 5.6632939651  
N, 0, 0.7856650581, 1.6970666975, 2.7400593979  
N, 0, 0.8751989963, -1.4843258728, 2.9101939137  
N, 0, 3.5204562384, -2.287703513, -1.9878517448  
N, 0, 3.6160856989, 0.8920485205, -2.0998365702  
O, 0, 2.3321792631, -1.704762501, 0.5087129454  
O, 0, 1.7664723231, 1.0019983343, 0.1257717364  
O, 0, 4.5119900705, 0.5795661207, -3.1451403498  
O, 0, 3.9696439726, -2.2603933203, -3.335320817  
O, 0, 0.488788403, -1.0863365107, 4.2213056917  
O, 0, 0.0721553766, 1.7518259406, 3.9676337381  
Zn, 0, 0.2959995773, -0.0653133701, 1.3483995183  
Zn, 0, 2.4065013584, -0.5737307772, -1.1830095471  
H, 0, 1.7524540289, 6.1999200513, -0.7594926985  
H, 0, 1.7779235608, -6.9000876953, 1.0573772104  
O, 0, -0.6652596068, -3.0444535895, -1.9864023288  
H, 0, -0.7925237883, -3.6211915383, -1.2154127331  
O, 0, -7.4915758478, -2.209326861, 0.1117436372  
N, 0, -7.0666828148, -2.3359414859, -1.036972059  
C, 0, -5.6829877595, -1.9250476999, -1.3039689354  
O, 0, -7.721972375, -2.7883356769, -1.9772393094  
C, 0, -4.9178195519, -1.3981015209, -0.2631652566  
C, 0, -5.1724408299, -2.0745962943, -2.5940977308  
C, 0, -3.6020395829, -1.0144085416, -0.5096787796  
H, 0, -5.3582465829, -1.2878265543, 0.7200489059  
C, 0, -3.8576095991, -1.6957088601, -2.8411314535

H, 0, -5. 8017059839, -2. 4839685048, -3. 3743512567  
C, 0, -3. 0861258158, -1. 1739337542, -1. 7992886005  
H, 0, -2. 9795956635, -0. 5846296185, 0. 2705571088  
H, 0, -3. 4182368451, -1. 7969459554, -3. 8274793361  
O, 0, -1. 7946523921, -0. 7616534149, -2. 1017156473  
P, 0, -0. 4858874213, -1. 5086325556, -1. 4867273871  
O, 0, -0. 4556309486, -1. 5187442011, 0. 0307455482  
O, 0, 0. 6902318085, -0. 859731916, -2. 2003912713  
O, 0, -1. 5369643784, 0. 721454498, 1. 3494043823  
C, 0, -1. 9945174371, 1. 926072504, 1. 1129605594  
C, 0, -2. 0196293223, 2. 4670085799, -0. 2059079002  
C, 0, -2. 5101409331, 2. 7380974731, 2. 1633023252  
C, 0, -2. 5011479033, 3. 7396225489, -0. 4542162181  
H, 0, -1. 6546310375, 1. 848963379, -1. 0214114996  
C, 0, -2. 9896101636, 4. 0146484937, 1. 916800425  
H, 0, -2. 5069634873, 2. 3305808568, 3. 1689021982  
C, 0, -2. 9764537832, 4. 5190259179, 0. 6100650834  
H, 0, -2. 5173156899, 4. 1520085837, -1. 4561962025  
H, 0, -3. 3757333848, 4. 6369878635, 2. 7158015492  
N, 0, -3. 4514255388, 5. 863635583, 0. 3568376237  
O, 0, -3. 8547581711, 6. 532327281, 1. 3172764203  
O, 0, -3. 4226665336, 6. 284807268, -0. 8066429061

7-RC

C, 0, 0. 0791809262, 0. 5370872356, 4. 1686662893  
H, 0, -0. 6029458178, 0. 4201592325, 5. 0132396545  
C, 0, 0. 2603388176, 1. 8710273918, 3. 6457497742  
C, 0, -0. 3258527334, 2. 9103770596, 4. 3990632213  
H, 0, -0. 9424016933, 2. 6446946873, 5. 2545441762  
C, 0, -0. 1157355176, 4. 2437086955, 4. 0870123141  
C, 0, 0. 7444511983, 4. 5505823631, 3. 0328969869  
H, 0, 0. 9766377369, 5. 5909912345, 2. 8176384616  
C, 0, 1. 3422060451, 3. 5594839549, 2. 2420328148  
C, 0, 1. 0392045813, 2. 1784905226, 2. 4787396069  
C, 0, 2. 341488806, 4. 0035362301, 1. 2829530337  
H, 0, 2. 5548315173, 5. 074604801, 1. 2564607487  
C, 0, 4. 9989744054, 2. 9189461624, -2. 1792767253  
H, 0, 5. 0119286593, 3. 8613395615, -2. 734581245  
H, 0, 5. 901743727, 2. 3442301333, -2. 4445054647  
C, 0, 5. 0342954836, 3. 1794563997, -0. 6797732047  
H, 0, 5. 0350700032, 2. 2460278294, -0. 1136356297  
H, 0, 5. 9522240382, 3. 7331755213, -0. 4455587291  
C, 0, 3. 4458655809, 0. 0643512048, -2. 6293991664  
H, 0, 3. 6456241679, 0. 1766719715, -3. 6937729376  
C, 0, 3. 1722909815, -1. 2759935009, -2. 1352757764  
C, 0, 3. 345664644, -2. 3202178576, -3. 0539836237  
H, 0, 3. 5781776826, -2. 0637930803, -4. 0845735621  
C, 0, 3. 249470703, -3. 6605567634, -2. 6827241229  
C, 0, 2. 9998845806, -3. 9606417286, -1. 3526996946  
H, 0, 2. 9652925566, -4. 9988044984, -1. 0301068074  
C, 0, 2. 7826283607, -2. 9524363561, -0. 3910544783  
C, 0, 2. 8174552006, -1. 5676119057, -0. 7743329056  
C, 0, 2. 6089146972, -3. 4031009656, 0. 971136046  
H, 0, 2. 7565882467, -4. 4678498699, 1. 161373382  
C, 0, 1. 2640360761, -2. 3537587839, 5. 1418178767

H, 0, 0. 7873970389, -3. 278154423, 5. 478984905  
H, 0, 1. 5662800178, -1. 7695471277, 6. 0256358267  
C, 0, 2. 5157137073, -2. 6690361129, 4. 330150746  
H, 0, 3. 0528345333, -1. 7619674925, 4. 0392871792  
H, 0, 3. 1847988063, -3. 2698644309, 4. 9579830449  
N, 0, 0. 6862035261, -0. 5301433279, 3. 7596141841  
N, 0, 2. 3145487101, -2. 6706909213, 1. 9973919106  
N, 0, 3. 5449839473, 1. 1076466384, -1. 8756459807  
N, 0, 3. 0283148686, 3. 2333477063, 0. 5121836631  
O, 0, 2. 5596624696, -0. 6157719234, 0. 084254488  
O, 0, 1. 484808651, 1. 2495329311, 1. 6702752529  
O, 0, 3. 9398572074, 3. 9921147361, -0. 2417511129  
O, 0, 3. 8321514115, 2. 2586857594, -2. 6600958124  
O, 0, 2. 2369046953, -3. 4526778068, 3. 1671163496  
O, 0, 0. 2163560065, -1. 6832286097, 4. 4402817482  
Zn, 0, 1. 3021640731, -0. 8083120911, 1. 7383427665  
Zn, 0, 1. 8275725975, 1. 4246561096, -0. 5119217882  
H, 0, -0. 5774738654, 5. 0317896858, 4. 6718712665  
H, 0, 3. 3931787067, -4. 4492652433, -3. 4132405438  
O, 0, -6. 1704765778, -5. 5886164449, 0. 6496842296  
N, 0, -5. 8267549605, -5. 3196904388, -0. 5026821203  
C, 0, -4. 7420164817, -4. 3518694199, -0. 6827751315  
O, 0, -6. 3316459238, -5. 8095054251, -1. 5139512813  
C, 0, -4. 1399274488, -3. 7883743552, 0. 4411859201  
C, 0, -4. 3326870423, -4. 0190663673, -1. 9754550861  
C, 0, -3. 1044197804, -2. 8727995854, 0. 2800460172  
H, 0, -4. 4824770091, -4. 0758601735, 1. 4275607324  
C, 0, -3. 3030894608, -3. 1026278013, -2. 1385455356  
H, 0, -4. 8234827481, -4. 4752427277, -2. 826139114  
C, 0, -2. 6904114491, -2. 5314342949, -1. 0147975865  
H, 0, -2. 6110393754, -2. 4436759756, 1. 1433737613  
H, 0, -2. 9585132317, -2. 8137093625, -3. 1255549714  
O, 0, -1. 666201104, -1. 6547296159, -1. 2866027364  
P, 0, -0. 9805436288, -0. 5756797788, -0. 2594259617  
O, 0, -0. 5454431495, -1. 2650240524, 1. 0292359822  
O, 0, 0. 0711052589, 0. 1346679869, -1. 0578027267  
O, 0, -2. 229552302, 0. 371791352, 0. 1809910815  
C, 0, -2. 9170714118, 1. 2256548212, -0. 6792836785  
C, 0, -2. 265719095, 2. 2384454972, -1. 3899298202  
C, 0, -4. 3045841165, 1. 0592051263, -0. 7336766915  
C, 0, -3. 0371797706, 3. 0932869562, -2. 1751984327  
H, 0, -1. 1846209404, 2. 3768214983, -1. 3451042072  
C, 0, -5. 0688044619, 1. 9177354656, -1. 5149737104  
H, 0, -4. 7659593634, 0. 2612657336, -0. 1615713403  
C, 0, -4. 4208251796, 2. 9267738575, -2. 2282190718  
H, 0, -2. 570871805, 3. 888621424, -2. 7433910793  
H, 0, -6. 1449816446, 1. 8191238959, -1. 5810931187  
N, 0, -5. 2230733013, 3. 8400044201, -3. 0504960152  
O, 0, -6. 4419480199, 3. 6600016037, -3. 084223858  
O, 0, -4. 6342918466, 4. 7348590776, -3. 6573795181  
O, 0, 0. 8523631131, 2. 7469102774, -1. 537459907  
H, 0, 1. 3854740862, 3. 5318837102, -1. 7305630098  
O, 0, 0. 9466925067, 0. 9817432929, -3. 6805726636  
H, 0, 0. 3891416172, 0. 3430176421, -3. 2090442091  
H, 0, 0. 8942642773, 1. 7538722424, -3. 0613855484

7-TS1

C, 0, -0.3170357823, 1.992165769, 2.7703310756  
H, 0, -1.1439805152, 2.4133155052, 3.3453480677  
C, 0, 0.201641225, 2.7900427331, 1.688220441  
C, 0, -0.3666250864, 4.069827948, 1.5462225097  
H, 0, -1.1444979009, 4.367976592, 2.2451840264  
C, 0, 0.0360534556, 4.9529823679, 0.5538169428  
C, 0, 1.0274806693, 4.5395641498, -0.3285874923  
H, 0, 1.3643812432, 5.2154342705, -1.1113840149  
C, 0, 1.6069589009, 3.2620593871, -0.2559287404  
C, 0, 1.2158462253, 2.3334459963, 0.7721849367  
C, 0, 2.6529777672, 2.9851946975, -1.210473876  
H, 0, 3.026300241, 3.829050502, -1.793829671  
C, 0, 6.0365199251, 0.3548443225, -2.6621457613  
H, 0, 6.2169890362, 0.636459457, -3.7034080886  
H, 0, 6.9944294401, 0.0534038591, -2.2083016977  
C, 0, 5.4856048514, 1.5295378631, -1.8735176516  
H, 0, 5.3500420461, 1.2662670557, -0.8223510868  
H, 0, 6.2006116214, 2.3612233409, -1.9323694653  
C, 0, 4.6179877814, -2.3697629448, -1.3621519462  
H, 0, 5.2105181896, -2.9282325221, -2.0913156457  
C, 0, 4.0008222965, -3.1503840689, -0.3094549664  
C, 0, 4.3664729326, -4.5072221106, -0.2886914258  
H, 0, 5.0211595036, -4.8731622907, -1.0762349984  
C, 0, 3.9383207567, -5.3794602505, 0.7047579532  
C, 0, 3.1644942365, -4.8613032759, 1.7315329859  
H, 0, 2.8650041522, -5.5038817627, 2.5560577517  
C, 0, 2.7556930687, -3.5134372215, 1.7571566476  
C, 0, 3.1007623543, -2.6219334844, 0.6796978637  
C, 0, 2.0916586219, -3.1120396211, 2.9747109061  
H, 0, 1.9979694702, -3.8724136601, 3.7518927756  
C, 0, -0.0191292207, 0.0861283173, 5.3614527125  
H, 0, -0.7194730671, -0.4774386866, 5.9840721074  
H, 0, 0.1872709301, 1.0530426336, 5.8484371481  
C, 0, 1.2946692015, -0.6695444657, 5.2162349705  
H, 0, 2.0374490885, -0.0881471872, 4.6639526549  
H, 0, 1.696207657, -0.8735398315, 6.2164954868  
N, 0, 0.0977680297, 0.8198638753, 3.127021655  
N, 0, 1.6460189624, -1.9368983698, 3.2731985414  
N, 0, 4.5421830455, -1.0925100645, -1.5276951354  
N, 0, 3.2157079028, 1.8440817187, -1.435190442  
O, 0, 2.6553813352, -1.393962249, 0.6250050101  
O, 0, 1.7793840062, 1.1688040153, 0.863969092  
O, 0, 4.2357627681, 1.9814354994, -2.4134101593  
O, 0, 5.1626692902, -0.7645312372, -2.7642493651  
O, 0, 1.1084044748, -1.9357582766, 4.5762572375  
O, 0, -0.7363386633, 0.2815529848, 4.1455379328  
Zn, 0, 1.0487560984, -0.5512238396, 1.7626101344  
Zn, 0, 2.3603251114, -0.1086686227, -1.1536439467  
H, 0, -0.4137640686, 5.9356200996, 0.4661444919  
H, 0, 4.2305104284, -6.4237918261, 0.6960197975  
O, 0, -7.5624095592, -2.8300115643, 0.9848323376  
N, 0, -7.3024303192, -2.5243922822, -0.1810190969  
C, 0, -5.9136296695, -2.2015357305, -0.5091567425

O, 0, -8.1345909955, -2.4744810312, -1.0889261961  
C, 0, -4.9436455556, -2.2644202625, 0.4927350585  
C, 0, -5.5897863756, -1.8395001598, -1.8176179062  
C, 0, -3.6216597518, -1.9655876901, 0.1863437418  
H, 0, -5.2345487722, -2.5509134779, 1.4958490389  
C, 0, -4.2696716323, -1.5351638865, -2.1235537901  
H, 0, -6.3686765528, -1.7966123661, -2.568643174  
C, 0, -3.2884668268, -1.599192624, -1.12542087  
H, 0, -2.8501643767, -2.0094186479, 0.9459063412  
H, 0, -3.979507919, -1.2434740072, -3.1271399384  
O, 0, -1.9983381954, -1.3635117961, -1.5330793896  
P, 0, -0.7716519706, -0.7086994404, -0.6003467199  
O, 0, -0.5073816889, -1.3452638861, 0.7755455875  
O, 0, 0.2618501419, 0.2069358969, -1.2474362853  
O, 0, -1.8526528934, 0.5191000801, 0.0238152567  
C, 0, -2.4297501887, 1.5230774477, -0.6649671548  
C, 0, -2.1210273668, 1.8743512306, -1.9955189871  
C, 0, -3.4108699976, 2.2616701598, 0.0311683609  
C, 0, -2.7703926869, 2.9446887828, -2.5976066787  
H, 0, -1.3594985119, 1.3270930026, -2.5352852427  
C, 0, -4.0560884355, 3.3301812523, -0.5690037825  
H, 0, -3.6538117174, 1.9620375367, 1.0456558504  
C, 0, -3.7275601353, 3.6699183659, -1.8850895578  
H, 0, -2.5411654794, 3.2327714105, -3.6165547843  
H, 0, -4.8118700784, 3.9021307178, -0.0445364032  
N, 0, -4.38958897, 4.8015432603, -2.5185372741  
O, 0, -5.2162067797, 5.4347771173, -1.8542137368  
O, 0, -4.0864506529, 5.0733250288, -3.6842380582  
O, 0, 1.9388352301, -1.1781156642, -2.7929368299  
H, 0, 2.6423902065, -1.7477719249, -3.1329757451  
O, 0, 0.2160585831, -2.2908455819, -1.5162864384  
H, 0, -0.4452321258, -2.775344321, -2.0340469091  
H, 0, 1.0030459814, -1.8374620361, -2.2390231613

7-IMI

C, 0, -0.3583941851, 0.7725411808, 3.5722762006  
H, 0, -1.1850949984, 0.7603084722, 4.2852629134  
C, 0, -0.0468084525, 2.0331922648, 2.9477168157  
C, 0, -0.7823232774, 3.1425482811, 3.4087493835  
H, 0, -1.5364998238, 2.9786594056, 4.174921863  
C, 0, -0.5683792173, 4.4233434401, 2.9213492726  
C, 0, 0.3996293194, 4.6003299611, 1.9372295983  
H, 0, 0.5857829283, 5.5963524548, 1.5418701671  
C, 0, 1.1388277163, 3.5274641648, 1.4164811824  
C, 0, 0.9406060864, 2.1919982534, 1.9122476563  
C, 0, 2.1088547085, 3.8553472288, 0.3957523826  
H, 0, 2.2932661437, 4.9152057586, 0.2097460031  
C, 0, 5.1260796851, 2.4715720758, -2.7019177463  
H, 0, 5.0646714028, 3.2325665213, -3.4850838287  
H, 0, 6.1354011581, 2.0322307007, -2.7150696879  
C, 0, 4.8866478291, 3.0830483084, -1.3291888547  
H, 0, 4.9815631194, 2.3346248956, -0.5392770177  
H, 0, 5.6464522807, 3.8582382151, -1.1638805788  
C, 0, 4.3038875893, -0.6056211755, -2.3508885003  
H, 0, 4.8552729584, -0.6908575833, -3.2901877124

C, 0, 4. 1467551889, -1. 8206747171, -1. 588228344  
C, 0, 4. 7306489223, -2. 9706378211, -2. 1516984163  
H, 0, 5. 2217435195, -2. 8784084439, -3. 1179271482  
C, 0, 4. 7012047077, -4. 2029654805, -1. 5136391831  
C, 0, 4. 0881325233, -4. 2811910046, -0. 2680942812  
H, 0, 4. 073093137, -5. 2314470659, 0. 2609495825  
C, 0, 3. 4816082895, -3. 1706565118, 0. 3433921969  
C, 0, 3. 4730238866, -1. 8840553447, -0. 3138986784  
C, 0, 2. 9461517867, -3. 4070424134, 1. 664605459  
H, 0, 3. 1132098547, -4. 3981863986, 2. 0902808239  
C, 0, 0. 4602630247, -1. 9179841236, 5. 1167966519  
H, 0, -0. 0578371346, -2. 8221370257, 5. 4479934083  
H, 0, 0. 5015066706, -1. 2062175634, 5. 9574235571  
C, 0, 1. 888466868, -2. 2429491275, 4. 6990212037  
H, 0, 2. 4458088127, -1. 3439168153, 4. 4234351598  
H, 0, 2. 4001941877, -2. 7148576419, 5. 5465154776  
N, 0, 0. 2562231955, -0. 3494223238, 3. 3769856306  
N, 0, 2. 3027276638, -2. 5683188847, 2. 4082570993  
N, 0, 3. 8662866179, 0. 5690413461, -2. 0382953316  
N, 0, 2. 7761215207, 3. 0144074161, -0. 3220648167  
O, 0, 2. 919397191, -0. 8415222269, 0. 2132272788  
O, 0, 1. 6469381474, 1. 2048770695, 1. 447108731  
O, 0, 3. 6050624875, 3. 7092057155, -1. 238970644  
O, 0, 4. 1674366017, 1. 4856228677, -3. 107220803  
O, 0, 1. 9355707038, -3. 1834786586, 3. 621228246  
O, 0, -0. 3758122601, -1. 4132267649, 4. 0776497063  
Zn, 0, 1. 2991490845, -0. 8400838818, 1. 5852060732  
Zn, 0, 1. 9235272698, 1. 0603303242, -0. 9007387271  
H, 0, -1. 143461413, 5. 2639951308, 3. 293355671  
H, 0, 5. 1550574657, -5. 0774451367, -1. 9666101772  
O, 0, -5. 907756166, -5. 2902921498, -1. 3705994131  
N, 0, -5. 8076992244, -4. 4273353673, -2. 2465810632  
C, 0, -4. 7024601244, -3. 4773688646, -2. 1473987152  
O, 0, -6. 5790256621, -4. 3175471228, -3. 2027439852  
C, 0, -3. 8043892352, -3. 582485561, -1. 0832926993  
C, 0, -4. 5638757321, -2. 4860777638, -3. 120877209  
C, 0, -2. 7447789051, -2. 6897611546, -0. 9875869734  
H, 0, -3. 9457535289, -4. 3640572891, -0. 3469713768  
C, 0, -3. 5074052312, -1. 5911447305, -3. 0237110953  
H, 0, -5. 2806899954, -2. 4281281673, -3. 9305210349  
C, 0, -2. 5950640817, -1. 6900993391, -1. 9621370586  
H, 0, -2. 0378546371, -2. 7512743123, -0. 1692782834  
H, 0, -3. 3686257057, -0. 8067085068, -3. 7599107151  
O, 0, -1. 5413284424, -0. 8220032119, -1. 9960659282  
P, 0, -0. 634678565, -0. 276627591, -0. 6957618828  
O, 0, -0. 0987135289, -1. 3783538377, 0. 2656772763  
O, 0, -0. 180312909, 1. 1938905479, -0. 6413528203  
O, 0, -2. 094804223, -0. 0563749115, 0. 2789250816  
C, 0, -3. 0301886995, 0. 8944762345, 0. 1440025688  
C, 0, -3. 0794682934, 1. 849324866, -0. 894929809  
C, 0, -4. 0438763545, 0. 9064352809, 1. 1291795411  
C, 0, -4. 1005084481, 2. 7887916933, -0. 9292090293  
H, 0, -2. 3041761757, 1. 8663564159, -1. 6485310473  
C, 0, -5. 0622316345, 1. 8432068686, 1. 0948631392  
H, 0, -4. 0027357527, 0. 1545597469, 1. 9110214969

C, 0, -5. 0843470931, 2. 7877246812, 0. 0628599152  
H, 0, -4. 1468253871, 3. 5322314972, -1. 7159068972  
H, 0, -5. 8421625979, 1. 859328235, 1. 8464672443  
N, 0, -6. 1408744831, 3. 7850890555, 0. 0277050912  
O, 0, -6. 9864003584, 3. 7677409017, 0. 9292087164  
O, 0, -6. 1393616971, 4. 6033594433, -0. 8982845174  
O, 0, 1. 4525658517, 2. 0082269077, -2. 8610031204  
H, 0, 2. 2840208279, 1. 9420355618, -3. 3672101231  
O, 0, 0. 8330698402, -0. 5142840975, -1. 8823092087  
H, 0, 1. 073389203, -1. 4534526455, -1. 9174138875  
H, 0, 0. 9047726678, 1. 2395796093, -3. 1139399059

#### 8-RC

C, 0, -0. 3304440307, -1. 9897078855, 2. 615315986  
H, 0, -1. 2579739251, -2. 4209038592, 2. 9902200353  
C, 0, 0. 2417855035, -0. 8879731698, 3. 3603524953  
C, 0, -0. 3538334142, -0. 6115486445, 4. 6040636994  
H, 0, -1. 23642793, -1. 1780053659, 4. 8899472482  
C, 0, 0. 1622693438, 0. 3449668805, 5. 468893338  
C, 0, 1. 3139656569, 1. 0260017856, 5. 0914807646  
H, 0, 1. 7559862143, 1. 7513640116, 5. 7703916478  
C, 0, 1. 9323327949, 0. 8144194422, 3. 8469468557  
C, 0, 1. 3737150826, -0. 1266229208, 2. 9207661225  
C, 0, 3. 166017636, 1. 5415167333, 3. 6155705569  
H, 0, 3. 5555575048, 2. 1254247697, 4. 4516210165  
C, 0, 6. 1973312713, 2. 9610143521, 0. 6014911515  
H, 0, 6. 4140521745, 3. 9621370739, 0. 9836772705  
C, 0, 7. 0529835274, 2. 6211513643, -0. 0042371179  
H, 0, 6. 0216344777, 1. 9780651214, 1. 7523549768  
H, 0, 5. 826398315, 0. 9644673189, 1. 3927244328  
H, 0, 6. 9582161137, 1. 9621460754, 2. 3234369532  
C, 0, 4. 4852883627, 1. 7941337121, -1. 9082763146  
H, 0, 5. 0165964617, 2. 5566551858, -2. 4821200757  
C, 0, 3. 8992872769, 0. 700016208, -2. 653152707  
C, 0, 4. 1737371728, 0. 6813696687, -4. 0333062637  
H, 0, 4. 7397934889, 1. 5071448389, -4. 4579111629  
C, 0, 3. 7597405484, -0. 3604689452, -4. 8525879273  
C, 0, 3. 0859342916, -1. 428760788, -4. 2713197618  
H, 0, 2. 7943628795, -2. 2772522425, -4. 8857629017  
C, 0, 2. 7686905078, -1. 4574691853, -2. 902220229  
C, 0, 3. 1240635332, -0. 3525528321, -2. 0558952579  
C, 0, 2. 1667431985, -2. 6833916184, -2. 4184023734  
H, 0, 2. 0701074234, -3. 4985882403, -3. 1377339576  
C, 0, 0. 0379154262, -4. 7947275389, 0. 9364894938  
H, 0, -0. 6650296603, -5. 426571153, 0. 3868488929  
H, 0, 0. 2010667779, -5. 2329175596, 1. 9342139656  
C, 0, 1. 3800799077, -4. 7437246832, 0. 2177531366  
H, 0, 2. 1159094034, -4. 1546891932, 0. 771044906  
H, 0, 1. 7617200591, -5. 7675942488, 0. 1257870886  
N, 0, 0. 1968083988, -2. 536457501, 1. 5686717661  
N, 0, 1. 76740506, -2. 9262656836, -1. 214266385  
N, 0, 4. 4594423468, 1. 9381612072, -0. 6245865793  
N, 0, 3. 8554421923, 1. 5521141347, 2. 5241529209  
O, 0, 2. 7838964539, -0. 32741637, -0. 7952820552  
O, 0, 1. 9016960634, -0. 2902594268, 1. 7301261187

0, 0, 4. 9948656881, 2. 3666074374, 2. 6661689949  
0, 0, 5. 057995236, 3. 1659648871, -0. 2373974253  
0, 0, 1. 2680449935, -4. 2359001575, -1. 1168027699  
0, 0, -0. 6491207419, -3. 5511779324, 1. 0470877347  
Zn, 0, 1. 1314280579, -1. 3091137571, 0. 0859526834  
Zn, 0, 2. 7944288771, 1. 3088124007, 0. 6206787538  
H, 0, -0. 3109734855, 0. 5426454897, 6. 4244317771  
H, 0, 3. 9797646454, -0. 3543466331, -5. 9144471837  
0, 0, 1. 4187491283, 2. 6058914314, 0. 5405020519  
H, 0, 1. 5792388284, 3. 3225521963, -0. 0895334745  
0, 0, -2. 611887433, 0. 7693578746, -1. 2454799794  
P, 0, -1. 8869820414, -0. 5007004267, -0. 4893363612  
0, 0, -0. 4019582923, -0. 499318771, -0. 8638243971  
0, 0, -2. 3023109098, -0. 6283708497, 0. 934785563  
0, 0, -2. 4959359765, -1. 6762157726, -1. 4805727703  
C, 0, -3. 7991378326, -2. 0889677065, -1. 5366292187  
C, 0, -4. 7504488761, -1. 830900452, -0. 5373795357  
C, 0, -4. 1459551163, -2. 8361252275, -2. 6728553328  
C, 0, -6. 0446066092, -2. 3167331047, -0. 6884791738  
H, 0, -4. 4648697895, -1. 2739178202, 0. 3468672694  
C, 0, -5. 4359560941, -3. 3245562315, -2. 8197508545  
H, 0, -3. 3880962618, -3. 0166462251, -3. 4277174235  
C, 0, -6. 377077367, -3. 0577950498, -1. 8229345421  
H, 0, -6. 8000477595, -2. 1346945939, 0. 0661303847  
H, 0, -5. 727585709, -3. 9020453352, -3. 6881762586  
N, 0, -7. 737631397, -3. 5720418305, -1. 9703072759  
0, 0, -7. 9985748999, -4. 2285136238, -2. 9813985416  
0, 0, -8. 5484526723, -3. 323141906, -1. 0756215416  
C, 0, -2. 7036209892, 2. 6307161063, -0. 698037507  
C, 0, -3. 9254007235, 2. 0953790315, -0. 8646551404  
C, 0, -1. 625077563, 2. 6484078528, -0. 0569109567  
C, 0, -4. 079431746, 3. 9874675261, -0. 3791627925  
H, 0, -4. 7379878068, 2. 1853478877, -1. 3711897777  
C, 0, -1. 783528926, 3. 9391071652, 0. 4372529615  
H, 0, -0. 653093049, 2. 1714435751, 0. 0500183261  
C, 0, -3. 004075055, 4. 5952515467, 0. 2732372059  
H, 0, -5. 0117575905, 4. 526936485, -0. 4900341659  
H, 0, -0. 9601892435, 4. 4300221217, 0. 9407614859  
N, 0, -3. 1640928669, 5. 954748261, 0. 7898617172  
0, 0, -2. 2022676022, 6. 4725416774, 1. 3613407314  
0, 0, -4. 2531629192, 6. 5105456245, 0. 6248549893

8-TS

C, 0, 0. 062097021, -2. 7254442226, 2. 6647272143  
H, 0, -0. 639572147, -3. 3874265142, 3. 1755178151  
C, 0, 0. 5663163719, -1. 604624273, 3. 4182967136  
C, 0, 0. 1835166735, -1. 5487897388, 4. 7697027988  
H, 0, -0. 44450053, -2. 3456998416, 5. 1612774888  
C, 0, 0. 5794352496, -0. 5137514148, 5. 6083826565  
C, 0, 1. 3574638184, 0. 5063649661, 5. 0743715272  
H, 0, 1. 6680206745, 1. 3327879343, 5. 7097907085  
C, 0, 1. 7503784317, 0. 5169376188, 3. 7245322256  
C, 0, 1. 3807111279, -0. 5635565455, 2. 8510914453  
C, 0, 2. 5380430159, 1. 6489278317, 3. 3004705301  
H, 0, 2. 8284695085, 2. 3605259474, 4. 0757227135

C, 0, 4. 6082377751, 3. 9370564627, -0. 0080304466  
H, 0, 4. 4233791965, 4. 9876063787, 0. 2322040082  
H, 0, 5. 5425368691, 3. 8671937307, -0. 5891838199  
C, 0, 4. 7793283849, 3. 1153640845, 1. 2621210411  
H, 0, 5. 0210499922, 2. 0732240499, 1. 0373929098  
H, 0, 5. 6096981906, 3. 5410116217, 1. 8394074595  
C, 0, 3. 8072008793, 1. 8500976979, -2. 221843231  
H, 0, 4. 1860967942, 2. 6657121994, -2. 8417259653  
C, 0, 3. 7599384603, 0. 5433961599, -2. 8238740024  
C, 0, 4. 1951454617, 0. 4599759847, -4. 1590947783  
H, 0, 4. 5795254818, 1. 3604964267, -4. 6335375147  
C, 0, 4. 1379511155, -0. 7235507493, -4. 8846690305  
C, 0, 3. 5866628697, -1. 8453122636, -4. 273316909  
H, 0, 3. 4945350019, -2. 7709867477, -4. 8374528109  
C, 0, 3. 118246304, -1. 8210155434, -2. 94925842  
C, 0, 3. 2560058249, -0. 6291424403, -2. 1412855559  
C, 0, 2. 508944485, -3. 0342577685, -2. 4674630536  
H, 0, 2. 5785730669, -3. 9108652613, -3. 1141176879  
C, 0, 0. 338756912, -5. 3051157226, 0. 7978874117  
H, 0, -0. 3490484142, -5. 9808119808, 0. 2824893353  
H, 0, 0. 6107147942, -5. 751688006, 1. 7682118367  
C, 0, 1. 6140330245, -5. 1127850141, -0. 0105647679  
H, 0, 2. 3421091501, -4. 4990528242, 0. 5263308684  
H, 0, 2. 0649832244, -6. 0963494964, -0. 192143772  
N, 0, 0. 3502808222, -3. 0314138926, 1. 4405785507  
N, 0, 1. 8579301225, -3. 203725515, -1. 3597397864  
N, 0, 3. 4210548427, 2. 1696832811, -1. 0275089914  
N, 0, 2. 9309921402, 1. 9288158894, 2. 0990985803  
0, 0, 2. 9541076105, -0. 6284795882, -0. 8935122911  
0, 0, 1. 7816034235, -0. 5920774461, 1. 6182828393  
0, 0, 3. 6217662493, 3. 1661801023, 2. 1017855503  
0, 0, 3. 4902258359, 3. 5781322484, -0. 8214453918  
0, 0, 1. 3540101635, -4. 5271189905, -1. 2937665882  
0, 0, -0. 439723977, -4. 1258768792, 0. 9916775515  
Zn, 0, 1. 005971315, -1. 703451434, -0. 0899446335  
Zn, 0, 2. 0777647298, 1. 1305435003, 0. 2532151482  
H, 0, 0. 2777532295, -0. 4958800029, 6. 6498234605  
H, 0, 4. 4866019964, -0. 7647723603, -5. 9106073497  
0, 0, 0. 1462017702, 2. 2116441312, 0. 2372179329  
H, 0, -0. 1911004782, 2. 6482455948, 1. 0358288009  
0, 0, -1. 8248661534, 1. 2365527029, -1. 1229382138  
P, 0, -0. 7809033887, 0. 6525392372, 0. 0200642906  
0, 0, 0. 5401657448, 0. 1449267081, -0. 6971141973  
0, 0, -1. 2360071785, 0. 5478597518, 1. 4511740465  
0, 0, -1. 3314539345, -1. 1517976392, -0. 4700328292  
C, 0, -2. 5382621217, -1. 7161613677, -0. 3379490433  
C, 0, -3. 5368474335, -1. 241261952, 0. 5423161825  
C, 0, -2. 8189623541, -2. 8547520328, -1. 1297346694  
C, 0, -4. 763446174, -1. 8856079651, 0. 6229956203  
H, 0, -3. 3139792758, -0. 3906545287, 1. 1728758707  
C, 0, -4. 0402864711, -3. 5005939874, -1. 046509586  
H, 0, -2. 0510614218, -3. 2096040402, -1. 810382083  
C, 0, -5. 0127508571, -3. 0113021254, -0. 1671655371  
H, 0, -5. 5351448174, -1. 535599567, 1. 2983682778  
H, 0, -4. 2625187259, -4. 3716805485, -1. 6509706452

N, 0, -6. 2930225856, -3. 6907215609, -0. 0678839464  
O, 0, -6. 4775975889, -4. 6901835043, -0. 7723694766  
O, 0, -7. 1334166496, -3. 239857181, 0. 7181225278  
C, 0, -2. 516749657, 2. 411892247, -1. 0265203404  
C, 0, -2. 8005888592, 3. 061075071, -2. 2364167501  
C, 0, -2. 9851374, 2. 9344591619, 0. 189120086  
C, 0, -3. 5375635952, 4. 2370217056, -2. 2376338941  
H, 0, -2. 4318042056, 2. 6273285041, -3. 1595084456  
C, 0, -3. 7189409002, 4. 1151443613, 0. 1880355339  
H, 0, -2. 7829893921, 2. 4065871695, 1. 1143160917  
C, 0, -3. 9855601053, 4. 757366768, -1. 0215881828  
H, 0, -3. 7667184922, 4. 7599741175, -3. 1578022231  
H, 0, -4. 0947799796, 4. 542520259, 1. 1095967282  
N, 0, -4. 752423057, 6. 0023289993, -1. 0164378397  
O, 0, -5. 126739348, 6. 444074033, 0. 0721663922  
O, 0, -4. 9796326682, 6. 5429570474, -2. 1010694497

8-PC

C, 0, -0. 6089594733, -2. 7354277077, 2. 4047833566  
H, 0, -1. 4985532169, -3. 2317752484, 2. 7963746981  
C, 0, -0. 1276327165, -1. 5722454454, 3. 1191392568  
C, 0, -0. 7531052788, -1. 3127157443, 4. 3525080737  
H, 0, -1. 5921161964, -1. 9386314743, 4. 6463697576  
C, 0, -0. 3174853117, -0. 3040339152, 5. 2015086295  
C, 0, 0. 7837322191, 0. 4502957745, 4. 8173105119  
H, 0, 1. 1653678072, 1. 2214061938, 5. 4821274809  
C, 0, 1. 4263731756, 0. 2569440756, 3. 5822559414  
C, 0, 0. 9496543734, -0. 7392604954, 2. 6695257577  
C, 0, 2. 594004341, 1. 0756945785, 3. 3461561268  
H, 0, 2. 9220824574, 1. 7116001203, 4. 1701865177  
C, 0, 5. 7468230092, 2. 49462057, 0. 4337597229  
H, 0, 5. 8861613477, 3. 5388987965, 0. 7255360275  
H, 0, 6. 6633459554, 2. 1417877595, -0. 0661108448  
C, 0, 5. 5167488696, 1. 6253212783, 1. 6632913553  
H, 0, 5. 4254563201, 0. 5677259198, 1. 4022226229  
H, 0, 6. 3838247761, 1. 7367955309, 2. 3258098298  
C, 0, 4. 2588121116, 1. 0488219812, -2. 0963412617  
H, 0, 4. 7539945719, 1. 8140064838, -2. 6972830821  
C, 0, 3. 7870284731, -0. 130542627, -2. 7895116447  
C, 0, 4. 1416909647, -0. 2230969297, -4. 148803262  
H, 0, 4. 6731232661, 0. 610751455, -4. 6010443364  
C, 0, 3. 8476031352, -1. 3457591379, -4. 9100093165  
C, 0, 3. 2135482661, -2. 416378764, -4. 2891674897  
H, 0, 3. 015018669, -3. 3233910386, -4. 8550238925  
C, 0, 2. 8179914937, -2. 3724226911, -2. 9412940966  
C, 0, 3. 0488599354, -1. 1896100369, -2. 1633488548  
C, 0, 2. 2609400354, -3. 599662938, -2. 4058162907  
H, 0, 2. 2520607901, -4. 4643359596, -3. 0718546108  
C, 0, -0. 0403221919, -5. 574743233, 0. 912445281  
H, 0, -0. 6562492849, -6. 2754381628, 0. 3427027805  
H, 0, 0. 0467693385, -5. 9416573448, 1. 9479392122  
C, 0, 1. 362620149, -5. 4971108409, 0. 3235616914  
H, 0, 2. 0065183264, -4. 8237427258, 0. 8950496032  
H, 0, 1. 8022732536, -6. 5011364309, 0. 3585000969  
N, 0, -0. 0449826632, -3. 2674728244, 1. 3707877125

N, 0, 1. 8030442214, -3. 781230535, -1. 2125448731  
N, 0, 4. 1787680084, 1. 2657933432, -0. 8254312523  
N, 0, 3. 3094244898, 1. 1176008335, 2. 2697184662  
O, 0, 2. 6282544652, -1. 1040032413, -0. 9242317623  
O, 0, 1. 5039511484, -0. 895853137, 1. 4900788017  
O, 0, 4. 3715717352, 2. 0322802396, 2. 4184354261  
O, 0, 4. 6677855347, 2. 5548566032, -0. 4984419222  
O, 0, 1. 3638277996, -5. 1056922342, -1. 0523632769  
O, 0, -0. 7975303977, -4. 3649203603, 0. 8809296343  
Zn, 0, 0. 9152220186, -2. 0969755194, -0. 1450254325  
Zn, 0, 2. 5099387052, 0. 5757682087, 0. 3450399322  
H, 0, -0. 8127445198, -0. 1227157323, 6. 148988013  
H, 0, 4. 1275503569, -1. 3974620517, -5. 9564056185  
O, 0, 0. 4170375559, 4. 1047596086, 0. 6304249304  
H, 0, 0. 0080430814, 4. 4030839376, 1. 4584449383  
O, 0, -1. 0622469775, 2. 6204492435, -0. 8416994576  
P, 0, 0. 0354655211, 2. 534424102, 0. 3904021235  
O, 0, 1. 2335837208, 1. 9016409576, -0. 3217759359  
O, 0, -0. 5112563277, 1. 9205407906, 1. 6397203806  
O, 0, -0. 5308802288, -1. 5917069225, -1. 3163849682  
C, 0, -1. 8248034422, -1. 5273888537, -1. 074963249  
C, 0, -2. 3637803983, -0. 7531418537, -0. 0109747588  
C, 0, -2. 7354263983, -2. 2347886398, -1. 9056817759  
C, 0, -3. 7294405071, -0. 717621873, 0. 2237025006  
H, 0, -1. 6950741606, -0. 1528992074, 0. 6003401878  
C, 0, -4. 0982025584, -2. 2014208037, -1. 6707766096  
H, 0, -2. 3282732124, -2. 814603643, -2. 7288758653  
C, 0, -4. 5948140479, -1. 4498043284, -0. 5972176207  
H, 0, -4. 1446909067, -0. 1246841335, 1. 0299765671  
H, 0, -4. 7936688163, -2. 7506359955, -2. 2943519396  
N, 0, -6. 0185487094, -1. 4343801351, -0. 3316760522  
O, 0, -6. 7610967406, -2. 0770811662, -1. 0848581473  
O, 0, -6. 425471405, -0. 7854966755, 0. 6405369439  
C, 0, -2. 2692781738, 3. 2608219058, -0. 7680067556  
C, 0, -2. 7681982236, 3. 7726936878, -1. 9746395456  
C, 0, -3. 0066902723, 3. 3908967479, 0. 4190547442  
C, 0, -3. 9888763266, 4. 4316927944, -1. 9988192546  
H, 0, -2. 1792189112, 3. 6461401214, -2. 8765102582  
C, 0, -4. 2268202894, 4. 0583644948, 0. 3957982327  
H, 0, -2. 628871194, 2. 9527413506, 1. 3357450986  
C, 0, -4. 7035790127, 4. 5771556858, -0. 8077362791  
H, 0, -4. 393249788, 4. 840706205, -2. 916334442  
H, 0, -4. 8191999764, 4. 1750548643, 1. 2950100034  
N, 0, -5. 9789599447, 5. 2932451374, -0. 8233790118  
O, 0, -6. 5737952602, 5. 4343024538, 0. 2469850749  
O, 0, -6. 3843183328, 5. 7223389237, -1. 9058889958

9-RC

C, 0, 0. 7716930082, -3. 5242888552, 0. 8253860055  
H, 0, 1. 6523315047, -4. 1574199912, 0. 7064024876  
C, 0, -0. 3966937089, -3. 8557471722, 0. 0407833959  
C, 0, -0. 3282276218, -5. 0564515912, -0. 6905526461  
H, 0, 0. 607311334, -5. 6101714113, -0. 6883829927  
C, 0, -1. 4195379597, -5. 5487376676, -1. 3921548866  
C, 0, -2. 6149408782, -4. 8393732986, -1. 3406109791

H, 0, -3. 4912319931, -5. 2295159186, -1. 8526490315  
C, 0, -2. 7347544952, -3. 621903441, -0. 6491702126  
C, 0, -1. 595680422, -3. 0695513522, 0. 0244453569  
C, 0, -4. 0617635506, -3. 0333855828, -0. 6279060065  
H, 0, -4. 8610691555, -3. 6159289393, -1. 0898173846  
C, 0, -6. 5048232529, 0. 6832030286, 0. 012639597  
H, 0, -7. 1966100531, 0. 5982338242, -0. 8296099804  
H, 0, -6. 9642231206, 1. 3223714661, 0. 7837123246  
C, 0, -6. 2547231436, -0. 6858443191, 0. 6364494919  
H, 0, -5. 5750224405, -0. 6246717596, 1. 490141794  
H, 0, -7. 2182182003, -1. 0684378883, 0. 9944530293  
C, 0, -3. 8722928472, 2. 5024978369, 0. 6524689059  
H, 0, -4. 4585265237, 3. 343546457, 0. 2784664626  
C, 0, -2. 735413023, 2. 8076929396, 1. 4993777019  
C, 0, -2. 6097414417, 4. 1516954353, 1. 8963027436  
H, 0, -3. 2958920482, 4. 8829219783, 1. 4773558092  
C, 0, -1. 6360704155, 4. 5627036369, 2. 7992508674  
C, 0, -0. 7848731702, 3. 6054605248, 3. 3365093731  
H, 0, -0. 0429781417, 3. 9000420685, 4. 0751460527  
C, 0, -0. 8409955613, 2. 2533134746, 2. 9502063272  
C, 0, -1. 7999816662, 1. 8255652675, 1. 9723824852  
C, 0, 0. 0691292838, 1. 3600231955, 3. 6388551648  
H, 0, 0. 6630583936, 1. 7940238756, 4. 4453249393  
C, 0, 2. 1057398646, -2. 6556832251, 3. 6788948623  
H, 0, 3. 1117487656, -2. 3699510811, 3. 9974605999  
H, 0, 1. 9470969998, -3. 7186567098, 3. 9226539887  
C, 0, 1. 0585075402, -1. 8458617705, 4. 4356494914  
H, 0, 0. 041281284, -2. 1354728684, 4. 1591360727  
H, 0, 1. 1885499846, -2. 0462662436, 5. 5059328362  
N, 0, 0. 8459071871, -2. 569533777, 1. 6944466911  
N, 0, 0. 2406196516, 0. 0998308683, 3. 4100802188  
N, 0, -4. 2597913713, 1. 3123615333, 0. 3326775085  
N, 0, -4. 3926606713, -1. 8976676282, -0. 1112095562  
O, 0, -1. 8270083859, 0. 5850325981, 1. 5532110486  
O, 0, -1. 6674357877, -1. 904186721, 0. 6227995591  
O, 0, -5. 7644158592, -1. 651033766, -0. 2971525674  
O, 0, -5. 3697025565, 1. 3439774379, -0. 5522381041  
O, 0, 1. 2146952615, -0. 4329844772, 4. 2726918214  
O, 0, 2. 1422816134, -2. 4771958421, 2. 2623969793  
Zn, 0, -0. 1709863357, -0. 7124464818, 1. 4521559857  
Zn, 0, -2. 8930549924, -0. 3034271245, -0. 0786212551  
H, 0, -1. 3483553669, -6. 4744003614, -1. 9525112277  
H, 0, -1. 5556067503, 5. 6046912472, 3. 0879165779  
O, 0, -2. 9456134816, 4. 879627133, -1. 6679295291  
N, 0, -1. 8258395334, 5. 161509398, -1. 2251010346  
C, 0, -0. 7378198586, 4. 2191535224, -1. 4610993226  
O, 0, -1. 5898621359, 6. 172772162, -0. 55789739  
C, 0, -0. 9462459358, 3. 1353143162, -2. 3177089526  
C, 0, 0. 4599976784, 4. 3875379479, -0. 7603988984  
C, 0, 0. 0413193703, 2. 1637607545, -2. 4430870702  
H, 0, -1. 8823758982, 3. 0526762676, -2. 8557950468  
C, 0, 1. 4396340059, 3. 4097797958, -0. 8735424199  
H, 0, 0. 5880896335, 5. 2496118494, -0. 1181474349  
C, 0, 1. 2058256294, 2. 2912073738, -1. 6815139334  
H, 0, -0. 0924383491, 1. 2805240555, -3. 0684940821

H, 0, 2. 3694987079, 3. 4798642901, -0. 3195390813  
O, 0, 2. 1650188772, 1. 2978432034, -1. 7341403703  
P, 0, 2. 0393348644, -0. 0363366829, -0. 775614443  
O, 0, 1. 1231228049, 0. 3390607985, 0. 3885767066  
O, 0, 1. 7947286145, -1. 2822103127, -1. 5577707127  
O, 0, 3. 5466998589, -0. 0146342762, -0. 0973055683  
C, 0, 4. 7279981239, -0. 3416130089, -0. 7067466917  
C, 0, 4. 8287778802, -0. 9109967637, -1. 9851083239  
C, 0, 5. 8820197805, -0. 0757788673, 0. 0467058483  
C, 0, 6. 0862147461, -1. 2050056027, -2. 5012525641  
H, 0, 3. 9340083605, -1. 1352593799, -2. 5523639898  
C, 0, 7. 1351724113, -0. 373125535, -0. 4680637777  
H, 0, 5. 7702157134, 0. 3652952086, 1. 0314902585  
C, 0, 7. 2257252396, -0. 9364850727, -1. 7427187635  
H, 0, 6. 194510388, -1. 6443369155, -3. 4852833422  
H, 0, 8. 0394572734, -0. 1762783373, 0. 0943053895  
N, 0, 8. 5435057445, -1. 2546817778, -2. 2903036057  
O, 0, 9. 53096358, -1. 008042151, -1. 5934278381  
O, 0, 8. 5950840942, -1. 7530824263, -3. 4164368463  
O, 0, -2. 3001018095, -0. 0962295499, -1. 8709363561  
H, 0, -2. 8044717812, 0. 5505793566, -2. 3832923884  
O, 0, -0. 2937937884, -0. 8116644494, -3. 6187311234  
H, 0, 0. 4376539615, -1. 0972774808, -3. 041345621  
H, 0, -1. 0427785355, -0. 6707113261, -2. 9917284073

9-TS

C, 0, -0. 1044690399, -4. 0830580548, 0. 4208719429  
H, 0, 0. 5017203587, -4. 9896428943, 0. 3684604687  
C, 0, -1. 4108077249, -4. 1331850742, -0. 1862881554  
C, 0, -1. 802882837, -5. 3807499606, -0. 7115592503  
H, 0, -1. 0980069721, -6. 20737047, -0. 6616213373  
C, 0, -3. 0531354132, -5. 5737098159, -1. 2781721473  
C, 0, -3. 9387856977, -4. 4982309643, -1. 3117661821  
H, 0, -4. 9307301133, -4. 636152047, -1. 7360141876  
C, 0, -3. 5988514986, -3. 2308995271, -0. 8166921774  
C, 0, -2. 2978612619, -3. 0051316901, -0. 2510537611  
C, 0, -4. 634109309, -2. 2163764468, -0. 8804214155  
H, 0, -5. 6020111262, -2. 5309820617, -1. 2763573369  
C, 0, -5. 6722904243, 2. 1472810234, -0. 6326157131  
H, 0, -6. 3587815023, 2. 2410860586, -1. 4787340445  
H, 0, -5. 8815495565, 2. 9606643011, 0. 0814950576  
C, 0, -5. 8838764946, 0. 8224353282, 0. 0898742798  
H, 0, -5. 2124426466, 0. 7205748485, 0. 9460039871  
H, 0, -6. 9174980931, 0. 7993256198, 0. 4575712299  
C, 0, -2. 85276302, 3. 014914453, 0. 2871042434  
H, 0, -3. 2961826797, 3. 983923379, 0. 045749602  
C, 0, -1. 7762092985, 3. 0074070682, 1. 2480430905  
C, 0, -1. 4168723412, 4. 2514631568, 1. 7962707639  
H, 0, -1. 9388642189, 5. 1410377785, 1. 4527287146  
C, 0, -0. 4101950766, 4. 3768377258, 2. 7476283633  
C, 0, 0. 2595982193, 3. 228692922, 3. 1537862099  
H, 0, 1. 0515265145, 3. 3045983542, 3. 8956785122  
C, 0, -0. 0404455382, 1. 9611964786, 2. 623133805  
C, 0, -1. 0886295474, 1. 8055532973, 1. 6468967737  
C, 0, 0. 7345093005, 0. 8556660679, 3. 1285996386

H, 0, 1. 4155689628, 1. 0684063082, 3. 9548251612  
C, 0, 1. 8447014903, -3. 5266540702, 2. 8688749571  
H, 0, 2. 9223627279, -3. 5310242112, 3. 0529553148  
H, 0, 1. 431108202, -4. 5033477679, 3. 1692217654  
C, 0, 1. 1608677956, -2. 4523515435, 3. 7040637096  
H, 0, 0. 0763336273, -2. 4630795314, 3. 5680705723  
H, 0, 1. 3740520821, -2. 6514509048, 4. 7613867534  
N, 0, 0. 4184588516, -3. 075799993, 1. 0435175893  
N, 0, 0. 7190716254, -0. 3679971217, 2. 7035021951  
N, 0, -3. 3460431562, 1. 9753070512, -0. 2999997793  
N, 0, -4. 5206364851, -0. 9849791024, -0. 5151334267  
O, 0, -1. 3992643926, 0. 6424865388, 1. 1747775281  
O, 0, -1. 951267369, -1. 8312175132, 0. 1948594869  
O, 0, -5. 7306038842, -0. 3055278208, -0. 7700960721  
O, 0, -4. 3800136478, 2. 3315709784, -1. 2197303094  
O, 0, 1. 6611829077, -1. 1379276196, 3. 4283381773  
O, 0, 1. 7499740225, -3. 3617867206, 1. 4543783577  
Zn, 0, -0. 027109588, -0. 9996661843, 0. 7639267632  
Zn, 0, -2. 4524183178, 0. 0338997908, -0. 7500146754  
H, 0, -3. 3397862203, -6. 53990539, -1. 6788694982  
H, 0, -0. 1426878511, 5. 348397691, 3. 1470282897  
O, 0, 0. 1485580256, 6. 5527144236, -0. 2134412315  
N, 0, 1. 1581409212, 5. 9083689045, 0. 087041867  
C, 0, 1. 3810970087, 4. 6326515255, -0. 5893551756  
O, 0, 1. 9742432318, 6. 2634477098, 0. 939943884  
C, 0, 0. 4924983427, 4. 228111893, -1. 5883468912  
C, 0, 2. 4532102254, 3. 8318049762, -0. 1923670952  
C, 0, 0. 6576287989, 2. 9819989815, -2. 1798550554  
H, 0, -0. 3122992946, 4. 8893257043, -1. 8851555224  
C, 0, 2. 6143640342, 2. 5826184774, -0. 7815219346  
H, 0, 3. 1297286533, 4. 1869458002, 0. 5749984765  
C, 0, 1. 7042215721, 2. 1517758069, -1. 7553597631  
H, 0, -0. 0038348605, 2. 6258404076, -2. 9602334673  
H, 0, 3. 4289105498, 1. 9274118607, -0. 4926482628  
O, 0, 1. 9009751992, 0. 9214221837, -2. 3312220284  
P, 0, 0. 9226151576, -0. 3766874815, -2. 0374054674  
O, 0, -0. 257552266, -0. 0811225217, -1. 0741396561  
O, 0, 1. 1750726595, -1. 5557909656, -2. 9095293149  
O, 0, 1. 8922308346, -0. 8228408152, -0. 5218587623  
C, 0, 3. 2103376784, -1. 1498281951, -0. 491815741  
C, 0, 3. 9025092731, -1. 6532118675, -1. 6099265566  
C, 0, 3. 8990842495, -0. 9641470443, 0. 7234457441  
C, 0, 5. 2540097776, -1. 9576316249, -1. 507458136  
H, 0, 3. 3642336855, -1. 8137291614, -2. 5352206609  
C, 0, 5. 2471090926, -1. 2740017815, 0. 8262634149  
H, 0, 3. 3555278973, -0. 5947261637, 1. 58538233  
C, 0, 5. 9190597399, -1. 767723876, -0. 2945002527  
H, 0, 5. 8024431548, -2. 3482663487, -2. 3561188845  
H, 0, 5. 7893725586, -1. 13699527, 1. 753927785  
N, 0, 7. 3358547184, -2. 0959789727, -0. 1901299506  
O, 0, 7. 8899093373, -1. 9254558156, 0. 9005111  
O, 0, 7. 9063297023, -2. 5284059717, -1. 1948805985  
O, 0, -2. 6314679032, 0. 0725758338, -2. 7051102733  
H, 0, -3. 2829086966, 0. 725524391, -3. 0001262969  
O, 0, -0. 3303765179, 0. 4345572023, -3. 5428004361

H, 0, -0. 1540101189, -0. 1983794841, -4. 258817749  
H, 0, -1. 3574137664, 0. 2891175616, -3. 2357492721

9-PC

C, 0, 1. 0478139751, -3. 9415881531, 0. 5157140734  
H, 0, 1. 8425005022, -4. 68992272, 0. 4775722141  
C, 0, -0. 2601863639, -4. 3420535749, 0. 0465976001  
C, 0, -0. 4021017951, -5. 675935807, -0. 3715497832  
H, 0, 0. 4809456884, -6. 3106141636, -0. 3845531567  
C, 0, -1. 6325257121, -6. 1993194775, -0. 7531174759  
C, 0, -2. 7503530641, -5. 3735764585, -0. 7005467883  
H, 0, -3. 7248207589, -5. 7713485783, -0. 9750828583  
C, 0, -2. 6661086644, -4. 0276710413, -0. 3034262326  
C, 0, -1. 3958395756, -3. 4636890781, 0. 0627024252  
C, 0, -3. 9073466727, -3. 2826781445, -0. 2761750517  
H, 0, -4. 8138694493, -3. 8300324438, -0. 5422820716  
C, 0, -5. 9150676074, 0. 7553277596, -0. 164268939  
H, 0, -6. 6799928453, 0. 624235893, -0. 9346970021  
H, 0, -6. 2378535629, 1. 5542401211, 0. 5203736602  
C, 0, -5. 7378068308, -0. 5239077002, 0. 6475720241  
H, 0, -4. 9918506505, -0. 4013834344, 1. 4364755828  
H, 0, -6. 7006380541, -0. 754447182, 1. 1204426562  
C, 0, -3. 2792009208, 2. 2928551966, 0. 4191821821  
H, 0, -3. 9471004561, 3. 125316433, 0. 1870874954  
C, 0, -2. 1614126454, 2. 5694632624, 1. 2793927977  
C, 0, -2. 05055745, 3. 8948305994, 1. 755654682  
H, 0, -2. 7671377996, 4. 6352194505, 1. 4089055172  
C, 0, -1. 0439168339, 4. 2684719578, 2. 6295725188  
C, 0, -0. 1411044626, 3. 2943462517, 3. 0611353212  
H, 0, 0. 6389484449, 3. 5681297758, 3. 7679582502  
C, 0, -0. 1954250842, 1. 9677231927, 2. 6139936744  
C, 0, -1. 2039335827, 1. 5697804074, 1. 6713403955  
C, 0, 0. 7774569167, 1. 0491850618, 3. 1781745533  
H, 0, 1. 4368296419, 1. 4500658727, 3. 9508232906  
C, 0, 2. 8653605825, -2. 9138593812, 2. 821835698  
H, 0, 3. 891877449, -2. 5910651979, 3. 0129899354  
H, 0, 2. 7774924442, -3. 9844572283, 3. 0727335983  
C, 0, 1. 8872956304, -2. 1559127569, 3. 7110090981  
H, 0, 0. 8532750595, -2. 4562080448, 3. 5228926402  
H, 0, 2. 130941462, -2. 3960686686, 4. 7532597898  
N, 0, 1. 3475405304, -2. 7930053468, 1. 0240999434  
N, 0, 0. 9345874268, -0. 1901555193, 2. 8563663793  
N, 0, -3. 5811430441, 1. 135783482, -0. 0812114828  
N, 0, -4. 0472656161, -2. 0312545515, 0. 0149218362  
O, 0, -1. 250955504, 0. 3521368681, 1. 2176431217  
O, 0, -1. 28676219, -2. 216584974, 0. 4124331038  
O, 0, -5. 3969768021, -1. 6480291677, -0. 1635593027  
O, 0, -4. 7589059018, 1. 1917799145, -0. 8998507147  
O, 0, 1. 997699219, -0. 7368163681, 3. 5951564223  
O, 0, 2. 7124490202, -2. 730265456, 1. 4115732316  
Zn, 0, 0. 4778770356, -0. 8344278893, 0. 6845820529  
Zn, 0, -2. 3596185537, -0. 602856779, -0. 376896592  
H, 0, -1. 721051471, -7. 232069316, -1. 0722304109  
H, 0, -0. 959240171, 5. 2932980561, 2. 97291199  
O, 0, -1. 7641052804, 6. 3258374368, -0. 7376081514



N, 0, -0.5926424494, 5.9744178656, -0.5565357402  
C, 0, -0.1454522851, 4.7413544954, -1.1985138023  
O, 0, 0.2092719204, 6.5858897627, 0.1504389521  
C, 0, -1.0037096957, 4.0915982175, -2.0869553834  
C, 0, 1.1096505979, 4.2193958024, -0.8770280792  
C, 0, -0.6086296917, 2.8805238215, -2.6424213165  
H, 0, -1.9581470104, 4.5409320412, -2.3322756883  
C, 0, 1.4962112939, 3.0009987647, -1.4215622503  
H, 0, 1.7516667096, 4.7571254229, -0.190582112  
C, 0, 0.6271805916, 2.3230181151, -2.2846247908  
H, 0, -1.2440575015, 2.3606807621, -3.3501105515  
H, 0, 2.4453640186, 2.5454109132, -1.1695312331  
O, 0, 1.0547607396, 1.1327634355, -2.8162061734  
P, 0, 0.253849991, -0.2915119729, -2.6516532847  
O, 0, -0.5025102736, -0.2584046253, -1.3122414997  
O, 0, 1.130128008, -1.4152008293, -3.0507354049  
O, 0, 2.0153007349, 0.1952993994, 0.0482140232  
C, 0, 3.3185093045, 0.041175714, -0.0111829225  
C, 0, 3.9292502434, -0.7432391786, -1.0299276056  
C, 0, 4.1742883917, 0.7074007906, 0.9099486987  
C, 0, 5.3046189892, -0.8669663851, -1.1066843731  
H, 0, 3.2849065118, -1.2321260396, -1.7546052116  
C, 0, 5.551483452, 0.5827460972, 0.83488822  
H, 0, 3.7192600745, 1.3202974431, 1.6828862013  
C, 0, 6.1176547228, -0.2097521235, -0.1712979268  
H, 0, 5.7729917339, -1.4632710227, -1.8809843884  
H, 0, 6.2050070855, 1.0853426753, 1.5383424096  
N, 0, 7.555398362, -0.3487919317, -0.2457396665  
O, 0, 8.2471471267, 0.2462933038, 0.5925026566  
O, 0, 8.0309110403, -1.0591525106, -1.1415045037  
O, 0, -3.229147739, -0.692205522, -2.3629613266  
H, 0, -3.926324417, -0.0105579236, -2.3416737614  
O, 0, -0.9843877533, -0.1127604995, -3.7695226924  
H, 0, -0.716908825, -0.5633286223, -4.588902616  
H, 0, -2.541724654, -0.426854047, -3.019449598

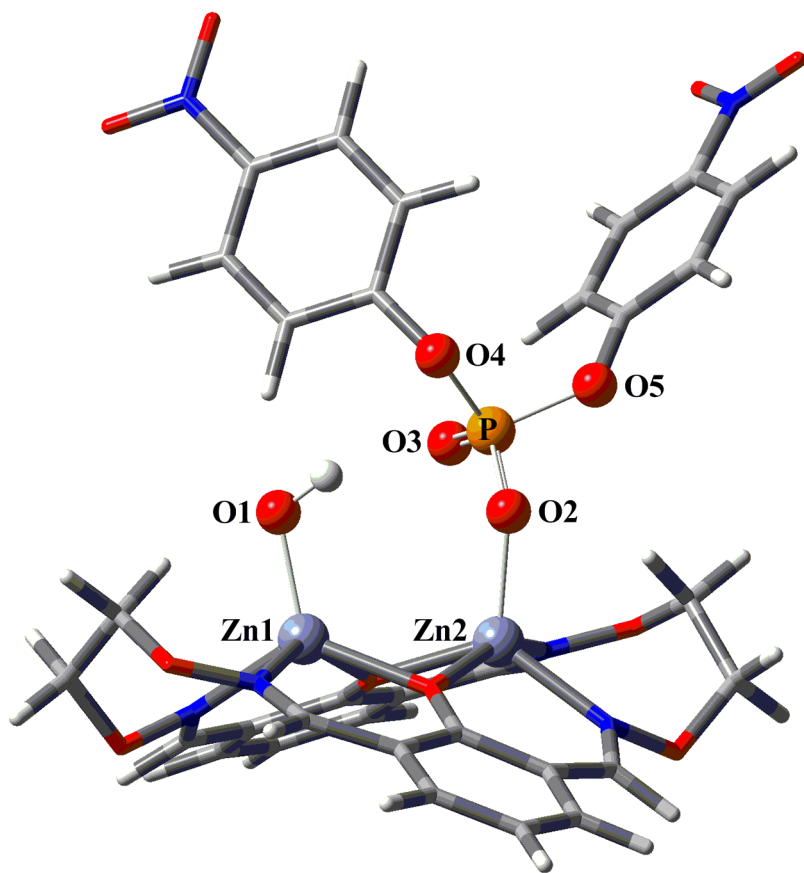

Figure S1. Labels of the atoms in the active site of the reaction complexes in mechanism 1.
